# Supplementary material
Source: publisher figshare collection journal article supplement (https://acs.figshare.com/ndownloader/files/3593550)
Supplement: Supplementary file 1 [file 3593550]

## Sheet: Sheet1
Accession	Description	ΣCoverage	Σ# Proteins	Σ# Unique Peptides	Σ# Peptides	Σ# PSMs	A9: Area	B9: Area	C9: Area	Score A(3,7)	Coverage A(3,7)	# Peptides A(3,7)	# PSM A(3,7)	Score B(3,7)	Coverage B(3,7)	# Peptides B(3,7)	# PSM B(3,7)	Score C(3,7)	Coverage C(3,7)	# Peptides C(3,7)	# PSM C(3,7)	# AAs	MW [kDa]	calc. pI
P01834	Ig kappa chain C region OS=Homo sapiens GN=IGKC PE=1 SV=1 - [IGKC_HUMAN]	84.91	1	7	8	7301	9.55734e+09	1.07293e+10	4.1609e+10	7002.25	69.81	12	2320	6808.47	84.91	15	2484	7109.27	69.81	11	2497	106	11.6017	5.87158
P02768	Serum albumin OS=Homo sapiens GN=ALB PE=1 SV=2 - [ALBU_HUMAN]	84.89	2	67	67	29479	2.05329e+10	28199114344	6.89943e+10	13770	72.74	107	6183	39825.9	84.89	131	17291	11636.3	72.25	104	6005	609	69.3215	6.27783
P68871	Hemoglobin subunit beta OS=Homo sapiens GN=HBB PE=1 SV=2 - [HBB_HUMAN]	77.55	2	7	12	2584	2.80356e+09	6.05908e+09	8.80539e+09	1756.87	77.55	22	813	2404.88	70.75	18	975	1556.85	63.95	14	796	147	15.9883	7.28369
P02675	Fibrinogen beta chain OS=Homo sapiens GN=FGB PE=1 SV=2 - [FIBB_HUMAN]	74.34	1	31	34	7096	5.67299e+09	14009872479	3.80716e+10	5040.69	65.58	53	1678	9562.65	70.47	61	3547	4684.75	69.45	52	1871	491	55.8923	8.26514
P02647	Apolipoprotein A-I OS=Homo sapiens GN=APOA1 PE=1 SV=1 - [APOA1_HUMAN]	74.16	3	30	30	6479	14325785692	8.42822e+09	2.591e+10	3761.77	71.54	52	1846	6177.42	70.79	52	2874	2934.49	69.66	51	1759	267	30.7589	5.75732
P02042	Hemoglobin subunit delta OS=Homo sapiens GN=HBD PE=1 SV=2 - [HBD_HUMAN]	71.43	2	5	10	914	8.2791e+07	4.51114e+08	2.76532e+08	544.086	63.27	17	341	473.297	70.75	17	250	430.688	55.78	12	323	147	16.0453	8.04541
P02787	Serotransferrin OS=Homo sapiens GN=TF PE=1 SV=3 - [TRFE_HUMAN]	69.91	16	49	50	15716	1.93614e+10	2.00349e+10	5.44608e+10	11249.7	62.61	77	4056	19534.7	69.91	94	7434	10525.2	58.31	67	4226	698	77.0136	7.12256
P0CG05	Ig lambda-2 chain C regions OS=Homo sapiens GN=IGLC2 PE=1 SV=1 - [LAC2_HUMAN]	69.81	4	2	6	1549	6.37247e+09	9.36297e+09	2.70251e+10	1048.81	55.66	9	455	1428.43	69.81	11	682	870.843	55.66	7	412	106	11.2865	7.23975
P02652	Apolipoprotein A-II OS=Homo sapiens GN=APOA2 PE=1 SV=1 - [APOA2_HUMAN]	67	1	6	6	56	1.0796e+06	1.09101e+07	1.79091e+07	30.6188	33	5	11	83.6516	62	9	37	20.4046	28	4	8	100	11.1679	6.62451
P69905	Hemoglobin subunit alpha OS=Homo sapiens GN=HBA1 PE=1 SV=2 - [HBA_HUMAN]	64.08	2	8	8	1269	4.1283e+08	4.61051e+08	9.26264e+08	1023.63	64.08	14	427	976.042	63.38	14	408	867.761	31.69	10	434	142	15.2479	8.67529
P01009	Alpha-1-antitrypsin OS=Homo sapiens GN=SERPINA1 PE=1 SV=3 - [A1AT_HUMAN]	61	8	29	29	8224	3.59719e+09	5.31004e+09	2.31825e+10	6217.31	56.94	48	2463	8725.8	59.81	53	3541	4278.49	55.5	47	2220	418	46.707	5.59229
P02766	Transthyretin OS=Homo sapiens GN=TTR PE=1 SV=1 - [TTHY_HUMAN]	59.86	1	6	6	214	1.64682e+08	1.39767e+08	5.33341e+08	401.328	43.54	6	93	274.864	59.86	11	75	168.731	43.54	6	46	147	15.877	5.75732
P35527	Keratin, type I cytoskeletal 9 OS=Homo sapiens GN=KRT9 PE=1 SV=3 - [K1C9_HUMAN]	59.55	2	29	30	642	8.56013e+08	1.7687e+08	9.66318e+08	805.67	59.55	50	279	595.911	41.57	37	219	392.848	42.05	36	144	623	62.0268	5.23682
P02774	Vitamin D-binding protein OS=Homo sapiens GN=GC PE=1 SV=1 - [VTDB_HUMAN]	57.59	2	23	23	1557	1.34818e+09	8.5907e+08	7.2934e+09	1154.19	44.09	35	395	1966.35	54.64	40	684	1232.06	50	36	478	474	52.929	5.5415
P01622	Ig kappa chain V-III region Ti OS=Homo sapiens PE=1 SV=1 - [KV304_HUMAN]	55.05	3	1	3	893	1.3239e+09	5.37951e+09	1.39397e+10	729.836	55.05	5	223	1224.24	55.05	5	387	861.454	55.05	5	283	109	11.7809	8.49951
P01876	Ig alpha-1 chain C region OS=Homo sapiens GN=IGHA1 PE=1 SV=2 - [IGHA1_HUMAN]	53.82	8	5	13	1556	3.02384e+09	1.84837e+09	6.92166e+09	1252.43	39.94	17	397	2428.84	53.82	24	817	1098.94	31.16	13	342	353	37.6306	6.50732
P00915	Carbonic anhydrase 1 OS=Homo sapiens GN=CA1 PE=1 SV=2 - [CAH1_HUMAN]	53.64	1	9	9	128	3.10818e+06	1.91311e+07	4.17388e+07	30.7646	12.64	6	18	120.805	53.64	16	63	63.8793	16.09	8	47	261	28.8524	7.12256
P01877	Ig alpha-2 chain C region OS=Homo sapiens GN=IGHA2 PE=1 SV=3 - [IGHA2_HUMAN]	53.24	8	3	11	529	1.59768e+08	1.1074e+09	2.70344e+08	341.017	31.18	12	106	1012.41	53.24	19	354	194.452	28.82	11	69	340	36.503	6.1001
P06727	Apolipoprotein A-IV OS=Homo sapiens GN=APOA4 PE=1 SV=3 - [APOA4_HUMAN]	52.27	15	24	24	1590	8.89497e+08	6.9442e+08	4.6251e+09	670.12	47.98	45	332	1531.54	52.27	47	717	804.975	47.98	44	541	396	45.3715	5.37646
P00747	Plasminogen OS=Homo sapiens GN=PLG PE=1 SV=2 - [PLMN_HUMAN]	51.11	5	35	37	1028	4.59013e+08	1.73553e+09	3.7636e+09	527.139	40.86	50	221	1312.13	48.02	58	566	523.594	40.12	42	241	810	90.5102	7.23975
P01871	Ig mu chain C region OS=Homo sapiens GN=IGHM PE=1 SV=3 - [IGHM_HUMAN]	50.22	2	7	16	975	8.77651e+08	2.0433e+09	5.47729e+09	696.026	38.94	22	281	1169.61	30.31	20	496	407.085	30.75	17	198	452	49.2755	6.771
P02749	Beta-2-glycoprotein 1 OS=Homo sapiens GN=APOH PE=1 SV=3 - [APOH_HUMAN]	48.99	1	11	12	822	5.98726e+08	1.22557e+09	2.56435e+09	590.225	29.57	16	184	1357.4	48.99	21	429	605.791	33.33	15	209	345	38.2727	7.97217
P02679-2	Isoform Gamma-A of Fibrinogen gamma chain OS=Homo sapiens GN=FGG - [FIBG_HUMAN]	48.74	2	24	24	3582	1.27655e+10	4.72088e+09	2.10797e+10	2865.7	44.85	45	1189	3187.12	43.94	40	1337	2274.45	44.85	42	1056	437	49.465	6.0874
P04206	Ig kappa chain V-III region GOL OS=Homo sapiens PE=1 SV=1 - [KV307_HUMAN]	48.62	3	1	3	910	1.35417e+09	5.41204e+09	1.40228e+10	750.658	48.62	6	229	1244.18	48.62	6	394	879.342	48.62	6	287	109	11.823	9.24658
P02649	Apolipoprotein E OS=Homo sapiens GN=APOE PE=1 SV=1 - [APOE_HUMAN]	47.95	1	13	13	488	7.21606e+07	1.43608e+08	5.19173e+08	339.34	39.75	19	120	733.438	43.22	21	257	261.118	35.96	18	111	317	36.1318	5.73193
P00738	Haptoglobin OS=Homo sapiens GN=HP PE=1 SV=1 - [HPT_HUMAN]	47.78	1	11	22	5359	1.22489e+10	4.81474e+09	2.74302e+10	3462.15	44.09	35	1403	5767.89	46.55	41	2547	3122.86	45.32	34	1409	406	45.1766	6.58057
P01024	Complement C3 OS=Homo sapiens GN=C3 PE=1 SV=2 - [CO3_HUMAN]	46.66	1	60	61	3551	1.19658e+09	3.49857e+09	6.33377e+09	2631.36	39.03	97	899	5212.23	41.13	101	1795	2363.24	37.7	93	857	1663	187.03	6.40479
P25311	Zinc-alpha-2-glycoprotein OS=Homo sapiens GN=AZGP1 PE=1 SV=2 - [ZA2G_HUMAN]	46.64	2	12	13	249	6.47312e+07	7.42055e+07	7.36031e+08	103.856	31.54	15	50	294.351	43.29	23	127	129.053	40.6	21	72	298	34.2371	6.04932
P05452	Tetranectin OS=Homo sapiens GN=CLEC3B PE=1 SV=3 - [TETN_HUMAN]	45.54	1	8	8	210	1.75734e+08	5.97024e+07	6.08446e+08	163.423	32.18	9	59	285.738	45.54	16	109	74.3108	32.18	9	42	202	22.5223	5.66846
P02533	Keratin, type I cytoskeletal 14 OS=Homo sapiens GN=KRT14 PE=1 SV=4 - [K1C14_HUMAN]	44.28	6	7	19	281	2.95303e+08	7.1752e+07	4.13738e+08	291.794	42.37	35	120	205.801	22.67	21	97	131.191	29.03	25	64	472	51.5294	5.16064
P04220	Ig mu heavy chain disease protein OS=Homo sapiens PE=1 SV=1 - [MUCB_HUMAN]	44.25	1	1	10	263	4.20695e+07	1.99152e+08	9.79577e+07	280.83	38.62	14	109	255.13	21.23	8	115	69.2321	21.74	7	39	391	43.0303	5.23682
P13645	Keratin, type I cytoskeletal 10 OS=Homo sapiens GN=KRT10 PE=1 SV=6 - [K1C10_HUMAN]	43.66	7	18	24	733	6.23731e+08	1.82659e+08	1.23184e+09	646.918	41.78	41	249	701.726	38.53	41	295	396.73	41.78	39	189	584	58.7917	5.21143
P01008	Antithrombin-III OS=Homo sapiens GN=SERPINC1 PE=1 SV=1 - [ANT3_HUMAN]	43.53	1	19	20	1443	5.90754e+08	2.36658e+08	2.68127e+09	702.007	43.1	35	295	1693.45	42.03	36	812	755.695	42.03	33	336	464	52.5689	6.7124
P01859	Ig gamma-2 chain C region OS=Homo sapiens GN=IGHG2 PE=1 SV=2 - [IGHG2_HUMAN]	43.25	1	6	12	3913	1.04947e+10	1.25513e+10	21287256465	2740.96	41.72	18	1198	3330.61	43.25	21	1779	2001.09	41.72	20	936	326	35.8778	7.59131
P08779	Keratin, type I cytoskeletal 16 OS=Homo sapiens GN=KRT16 PE=1 SV=4 - [K1C16_HUMAN]	42.49	5	10	18	324	2.95303e+08	7.42012e+07	4.13738e+08	327.71	40.59	34	137	251.055	38.05	31	116	139.967	32.35	26	71	473	51.2362	5.04639
P08697	Alpha-2-antiplasmin OS=Homo sapiens GN=SERPINF2 PE=1 SV=3 - [A2AP_HUMAN]	42.36	1	14	14	369	1.39138e+08	7.50811e+07	6.28971e+08	183.836	35.03	20	85	434.427	31.57	21	208	131.452	30.75	17	76	491	54.5311	6.29053
P01861	Ig gamma-4 chain C region OS=Homo sapiens GN=IGHG4 PE=1 SV=1 - [IGHG4_HUMAN]	41.59	1	5	10	2036	2.60685e+09	3.43992e+09	9.99256e+09	1106.42	29.05	13	548	1498.84	41.59	16	967	803.013	29.05	15	521	327	35.9179	7.35693
P01011	Alpha-1-antichymotrypsin OS=Homo sapiens GN=SERPINA3 PE=1 SV=2 - [AACT_HUMAN]	40.9	2	16	16	1548	9.15487e+08	4.96455e+08	2.78028e+09	955.093	36.17	30	349	2141.43	33.33	28	796	849.313	40.9	31	403	423	47.6205	5.51611
P01042-2	Isoform LMW of Kininogen-1 OS=Homo sapiens GN=KNG1 - [KNG1_HUMAN]	40.52	2	15	15	934	3.02121e+08	4.19549e+08	2.7909e+09	502.413	37.24	25	264	594.429	27.17	25	395	473.598	39.58	25	275	427	47.8527	6.65381
P00739	Haptoglobin-related protein OS=Homo sapiens GN=HPR PE=1 SV=2 - [HPTR_HUMAN]	40.23	2	3	14	2246	6.87069e+09	3.9856e+09	8.67912e+09	1066.47	37.36	19	560	2353.53	30.17	24	1188	805.072	32.47	17	498	348	39.0047	7.09326
P08603	Complement factor H OS=Homo sapiens GN=CFH PE=1 SV=4 - [CFAH_HUMAN]	39.48	2	30	32	1367	2.04546e+08	5.8842e+08	2.40792e+09	884.253	34.52	52	325	2213.45	37.86	60	773	667.621	27.38	44	269	1231	139.005	6.60986
P00734	Prothrombin OS=Homo sapiens GN=F2 PE=1 SV=2 - [THRB_HUMAN]	38.75	1	18	21	574	2.9448e+08	1.25316e+08	5.93031e+08	447.551	32.32	30	160	728.821	33.12	36	250	360.653	32.8	30	164	622	69.9921	5.89697
P00918	Carbonic anhydrase 2 OS=Homo sapiens GN=CA2 PE=1 SV=2 - [CAH2_HUMAN]	38.46	1	6	7	59	1.06233e+07	3.00913e+07	6.9646e+07	30.6362	32.31	10	14	61.0437	25	10	26	39.8819	20.38	9	19	260	29.2279	7.40088
P01023	Alpha-2-macroglobulin OS=Homo sapiens GN=A2M PE=1 SV=3 - [A2MG_HUMAN]	37.99	1	35	36	2509	1.18901e+09	1.71905e+09	7.28392e+09	1620.01	34.53	58	564	3645.82	37.99	65	1355	1402.28	33.38	55	590	1474	163.188	6.45557
P02790	Hemopexin OS=Homo sapiens GN=HPX PE=1 SV=2 - [HEMO_HUMAN]	37.45	2	16	16	1759	2.99108e+09	3.0708e+09	4.80524e+09	1214.51	32.68	24	524	1971.2	37.45	25	854	759.268	32.68	20	381	462	51.6433	7.02002
P00450	Ceruloplasmin OS=Homo sapiens GN=CP PE=1 SV=1 - [CERU_HUMAN]	36.9	1	31	31	1851	8.9468e+08	1.09885e+09	2.63704e+09	979.908	31.74	47	352	3254.55	31.46	53	1128	850.743	29.3	45	371	1065	122.128	5.71924
P23083	Ig heavy chain V-I region V35 OS=Homo sapiens PE=1 SV=1 - [HV103_HUMAN]	36.75	1	4	5	100	6.31761e+07	8.83653e+07	1.08732e+08	31.4491	26.5	6	23	79.674	32.48	8	43	47.1691	22.22	5	34	117	13.0004	9.5542
O43866	CD5 antigen-like OS=Homo sapiens GN=CD5L PE=1 SV=1 - [CD5L_HUMAN]	36.31	1	9	9	292	3.97329e+08	9.86261e+07	1.34361e+09	206.305	24.5	13	81	303.761	31.41	14	146	133.962	26.51	14	65	347	38.0629	5.46533
P01763	Ig heavy chain V-III region WEA OS=Homo sapiens PE=1 SV=1 - [HV302_HUMAN]	35.96	1	2	3	713	7.03684e+08	1.89883e+09	1.70007e+09	459.027	35.96	6	186	751.074	35.96	5	318	441.637	35.96	5	209	114	12.2485	8.49951
P01767	Ig heavy chain V-III region BUT OS=Homo sapiens PE=1 SV=1 - [HV306_HUMAN]	35.65	1	2	3	746	6.70893e+08	2.7703e+09	2.09818e+09	528.188	35.65	5	201	848.611	35.65	5	339	466.726	35.65	5	206	115	12.3712	9.24658
O95445	Apolipoprotein M OS=Homo sapiens GN=APOM PE=1 SV=2 - [APOM_HUMAN]	35.64	1	4	4	79	8.88515e+07	2.7473e+07	1.39496e+08	53.2466	23.4	6	27	44.8051	23.4	5	30	34.5055	35.64	7	22	188	21.2394	6.01123
P02538	Keratin, type II cytoskeletal 6A OS=Homo sapiens GN=KRT6A PE=1 SV=3 - [K2C6A_HUMAN]	34.93	4	2	20	292	1.97552e+08	5.78181e+07	3.49071e+08	282.397	34.93	37	120	252.432	19.86	26	103	134.063	26.06	26	69	564	60.0083	8.00146
P04259	Keratin, type II cytoskeletal 6B OS=Homo sapiens GN=KRT6B PE=1 SV=5 - [K2C6B_HUMAN]	34.93	4	1	20	363	6.03952e+08	1.46281e+08	8.92255e+08	379.161	34.93	37	160	300.292	18.26	24	119	163.815	26.06	26	84	564	60.0303	8.00146
P35908	Keratin, type II cytoskeletal 2 epidermal OS=Homo sapiens GN=KRT2 PE=1 SV=2 - [K22E_HUMAN]	34.9	5	15	24	622	5.22422e+08	1.45348e+08	1.39016e+09	548.573	34.27	43	211	683.642	30.2	38	268	327.244	28.48	34	143	639	65.3932	8.00146
P36955	Pigment epithelium-derived factor OS=Homo sapiens GN=SERPINF1 PE=1 SV=4 - [PEDF_HUMAN]	34.69	1	11	11	178	1.35978e+08	6.14738e+07	3.20698e+08	113.765	20.1	14	42	252.009	31.82	19	97	100.473	16.03	14	39	418	46.2833	6.37939
P04264	Keratin, type II cytoskeletal 1 OS=Homo sapiens GN=KRT1 PE=1 SV=6 - [K2C1_HUMAN]	34.63	4	22	27	1237	1.05042e+09	2.62792e+08	1.78846e+09	1096.21	29.35	47	459	1200.93	30.43	43	517	491.6	26.86	40	261	644	65.999	8.11865
P06310	Ig kappa chain V-II region RPMI 6410 OS=Homo sapiens PE=4 SV=1 - [KV206_HUMAN]	34.59	2	2	4	135	1.28534e+08	4.58428e+08	3.21126e+08	99.8906	34.59	6	40	173.333	34.59	6	61	75.5918	34.59	8	34	133	14.6974	9.24658
P02760	Protein AMBP OS=Homo sapiens GN=AMBP PE=1 SV=1 - [AMBP_HUMAN]	34.38	1	11	11	601	6.61296e+08	2.79391e+08	1.64447e+09	491.077	29.83	17	154	715.745	29.83	15	259	489.181	34.09	19	188	352	38.974	6.25244
P06396	Gelsolin OS=Homo sapiens GN=GSN PE=1 SV=1 - [GELS_HUMAN]	34.27	2	16	16	334	105258424	3.6603e+08	2.75691e+08	188.399	26.6	22	69	546.68	34.27	29	193	192.15	28.77	20	72	782	85.6442	6.27783
P07358	Complement component C8 beta chain OS=Homo sapiens GN=C8B PE=1 SV=3 - [CO8B_HUMAN]	33.5	1	15	16	253	8.48338e+07	3.01532e+08	5.01922e+08	152.608	19.97	20	53	367.279	28.43	26	131	178.782	24.53	21	69	591	67.0035	8.1333
P08571	Monocyte differentiation antigen CD14 OS=Homo sapiens GN=CD14 PE=1 SV=2 - [CD14_HUMAN]	33.33	1	5	6	79	1.55274e+07	1.79138e+07	6.4601e+07	67.5035	33.33	9	22	116.259	13.33	8	40	44.3168	7.73	6	17	375	40.0507	6.22705
P01614	Ig kappa chain V-II region Cum OS=Homo sapiens PE=1 SV=1 - [KV201_HUMAN]	33.04	2	1	2	108	3.43626e+08	6.88546e+08	4.59708e+08	79.6463	11.3	2	28	160.212	33.04	3	53	67.5673	33.04	3	27	115	12.6683	5.40186
P05090	Apolipoprotein D OS=Homo sapiens GN=APOD PE=1 SV=1 - [APOD_HUMAN]	32.8	1	6	6	162	1.22438e+08	8.95892e+07	6.81155e+08	130.44	29.1	10	50	209.342	32.8	11	77	79.2504	25.93	8	35	189	21.2618	5.14795
P01617	Ig kappa chain V-II region TEW OS=Homo sapiens PE=1 SV=1 - [KV204_HUMAN]	32.74	2	1	2	252	9.17682e+08	2.24784e+09	1.72558e+09	153.034	32.74	4	52	492.733	32.74	4	159	114.707	32.74	4	41	113	12.3082	5.99854
P01857	Ig gamma-1 chain C region OS=Homo sapiens GN=IGHG1 PE=1 SV=1 - [IGHG1_HUMAN]	32.73	1	5	10	2390	3773954244	6.99227e+09	9.49825e+09	1617.31	29.7	14	671	2405.82	29.7	17	1196	1029.86	32.73	14	523	330	36.0832	8.19189
P18136	Ig kappa chain V-III region HIC OS=Homo sapiens PE=2 SV=2 - [KV313_HUMAN]	32.56	1	1	2	107	1.39347e+08	1.61149e+09	2.40727e+08	97.77	12.4	2	34	166.538	12.4	2	51	70.2122	32.56	3	22	129	14.0801	6.59521
P04217	Alpha-1B-glycoprotein OS=Homo sapiens GN=A1BG PE=1 SV=4 - [A1BG_HUMAN]	32.53	2	9	9	399	1.74028e+08	3.12016e+08	4.1578e+08	307.084	22.63	13	119	517.087	25.05	15	183	256.961	30.1	13	97	495	54.2195	5.85889
P48668	Keratin, type II cytoskeletal 6C OS=Homo sapiens GN=KRT6C PE=1 SV=3 - [K2C6C_HUMAN]	32.27	4	0	19	280	1.97552e+08	5.78181e+07	3.49071e+08	265.918	32.27	35	114	252.82	19.86	26	103	119.507	23.4	24	63	564	59.9883	8.00146
P10909-4	Isoform 4 of Clusterin OS=Homo sapiens GN=CLU - [CLUS_HUMAN]	31.97	5	12	12	669	3.28081e+08	3.98936e+08	1.84594e+09	365.265	25.72	18	160	811.187	31.97	24	315	424.036	25.72	18	194	416	48.7721	6.7124
P51884	Lumican OS=Homo sapiens GN=LUM PE=1 SV=2 - [LUM_HUMAN]	31.95	1	8	8	103	6.73247e+07	4.69048e+07	3.297e+08	64.299	23.96	11	30	103.897	22.19	10	49	42.4164	23.67	11	24	338	38.4048	6.60986
P01593	Ig kappa chain V-I region AG OS=Homo sapiens PE=1 SV=1 - [KV101_HUMAN]	31.48	6	0	2	610	4.40647e+08	4.28715e+08	2.55244e+09	410.35	31.48	4	133	754.086	31.48	4	223	675.226	31.48	4	254	108	11.9849	5.98584
P01594	Ig kappa chain V-I region AU OS=Homo sapiens PE=1 SV=1 - [KV102_HUMAN]	31.48	6	1	2	583	2.26903e+08	3.66976e+08	2.23863e+09	399.917	31.48	4	132	655.424	31.48	4	197	662.782	31.48	4	254	108	11.9318	5.32568
P01603	Ig kappa chain V-I region Ka OS=Homo sapiens PE=1 SV=1 - [KV111_HUMAN]	31.48	1	1	2	41	3.71686e+06	5.34427e+06	3.10153e+07	9.1122	16.67	2	13	16.0474	31.48	3	7	23.5178	16.67	2	21	108	11.8924	8.85107
P01611	Ig kappa chain V-I region Wes OS=Homo sapiens PE=1 SV=1 - [KV119_HUMAN]	31.48	1	2	2	234	6.84624e+07	3.67683e+07	723880643	147.662	16.67	2	58	271.241	31.48	4	77	258.846	16.67	2	99	108	11.6007	7.28369
P60709	Actin, cytoplasmic 1 OS=Homo sapiens GN=ACTB PE=1 SV=1 - [ACTB_HUMAN]	30.93	10	3	7	111	3.6066e+07	1.2891e+07	1.49955e+08	115.234	23.47	12	40	96.0309	30.93	12	39	61.2335	23.47	11	32	375	41.7097	5.47803
Q04695	Keratin, type I cytoskeletal 17 OS=Homo sapiens GN=KRT17 PE=1 SV=2 - [K1C17_HUMAN]	30.79	4	6	14	210	2.80805e+08	5.32956e+07	4.0488e+08	178.67	28.24	24	81	166.331	21.3	20	80	88.5484	23.61	21	49	432	48.076	5.021
P04004	Vitronectin OS=Homo sapiens GN=VTN PE=1 SV=1 - [VTNC_HUMAN]	30.75	1	9	9	168	1.86897e+08	7.27689e+07	4.89031e+08	84.6027	14.64	13	39	247.919	28.24	15	93	67.1596	26.99	10	36	478	54.2712	5.79541
P02748	Complement component C9 OS=Homo sapiens GN=C9 PE=1 SV=2 - [CO9_HUMAN]	30.59	1	13	13	257	1.98905e+08	2.10129e+08	1.1545e+09	168.802	18.78	15	57	358.305	20.21	18	142	150.063	27.73	21	58	559	63.1327	5.59229
P0C0L4	Complement C4-A OS=Homo sapiens GN=C4A PE=1 SV=1 - [CO4A_HUMAN]	30.5	1	1	42	1738	8.39504e+08	2.12732e+09	3.34793e+09	1190.43	24.03	59	444	2212.06	23.05	64	879	843.809	26.55	59	415	1744	192.65	7.07861
P0C0L5	Complement C4-B OS=Homo sapiens GN=C4B PE=1 SV=1 - [CO4B_HUMAN]	30.5	1	1	42	1737	8.39504e+08	2.12732e+09	3.34793e+09	1184.37	22.48	58	443	2217.66	24.6	65	880	839.077	25	58	414	1744	192.673	7.15186
P02671	Fibrinogen alpha chain OS=Homo sapiens GN=FGA PE=1 SV=2 - [FIBA_HUMAN]	30.37	19	30	33	4852	7.04494e+09	9.36784e+09	2.5059e+10	2463.9	27.71	49	1087	5467.52	30.25	59	2400	2598.01	24.83	46	1365	866	94.9144	6.01123
B9A064	Immunoglobulin lambda-like polypeptide 5 OS=Homo sapiens GN=IGLL5 PE=2 SV=2 - [IGLL5_HUMAN]	30.37	2	2	6	1219	4.18134e+09	5.19836e+09	1.03097e+10	732.602	19.63	8	364	948.694	30.37	11	513	625.27	19.63	6	342	214	23.0486	8.83643
P01613	Ig kappa chain V-I region Ni OS=Homo sapiens PE=1 SV=1 - [KV121_HUMAN]	30.36	1	1	2	251	2.76308e+08	1.25302e+08	6.84471e+08	188.545	30.36	4	54	415.502	30.36	4	123	229.192	30.36	4	74	112	12.238	5.36377
P02753	Retinol-binding protein 4 OS=Homo sapiens GN=RBP4 PE=1 SV=3 - [RET4_HUMAN]	30.35	1	5	5	501	133226186	6.03677e+07	1.0612e+09	421.37	19.4	8	172	547.76	30.35	10	217	222.945	19.4	8	112	201	22.9953	6.07471
Q03591	Complement factor H-related protein 1 OS=Homo sapiens GN=CFHR1 PE=1 SV=2 - [FHR1_HUMAN]	30	1	1	6	327	1.52909e+08	4.63353e+08	2.8307e+09	181.596	30	11	73	429.196	30	11	169	169.751	17.58	10	85	330	37.626	7.38623
P01602	Ig kappa chain V-I region HK102 (Fragment) OS=Homo sapiens GN=IGKV1-5 PE=4 SV=1 - [KV110_HUMAN]	29.91	1	2	2	34	132328478	1.31475e+08	2.78334e+08	18.7662	13.68	2	8	33.1135	13.68	2	13	33.1631	29.91	4	13	117	12.7603	6.50732
P17936	Insulin-like growth factor-binding protein 3 OS=Homo sapiens GN=IGFBP3 PE=1 SV=2 - [IBP3_HUMAN]	29.21	1	4	5	20	8.99399e+06	3.20563e+07	5.59757e+07	6.7471	17.87	4	5	12.642	17.87	5	9	16.0147	25.77	6	6	291	31.6537	8.68994
P13647	Keratin, type II cytoskeletal 5 OS=Homo sapiens GN=KRT5 PE=1 SV=3 - [K2C5_HUMAN]	29.15	4	8	16	224	1.69479e+08	5.56641e+07	1.50196e+08	228.284	29.15	31	100	205.349	16.1	18	77	97.3377	19.15	18	47	590	62.34	7.73779
P36980-2	Isoform Short of Complement factor H-related protein 2 OS=Homo sapiens GN=CFHR2 - [FHR2_HUMAN]	28.81	2	4	6	192	1.77093e+08	3.30408e+08	1.44201e+09	130.232	28.81	12	54	254.803	23.46	9	95	83.866	28.81	11	43	243	27.8783	6.91748
Q15582	Transforming growth factor-beta-induced protein ig-h3 OS=Homo sapiens GN=TGFBI PE=1 SV=1 - [BGH3_HUMAN]	28.4	1	10	10	57	1.45869e+07	3.02586e+07	6.38836e+07	31.4986	8.49	10	15	57.6565	26.5	14	24	40.3909	11.86	10	18	683	74.634	7.7085
Q14624-2	Isoform 2 of Inter-alpha-trypsin inhibitor heavy chain H4 OS=Homo sapiens GN=ITIH4 - [ITIH4_HUMAN]	28.34	2	18	18	402	1.65234e+08	2.91799e+08	3.43029e+08	234.503	21.66	25	88	624.911	28.34	34	222	209.922	21.88	24	92	914	101.178	6.65381
Q16610	Extracellular matrix protein 1 OS=Homo sapiens GN=ECM1 PE=1 SV=2 - [ECM1_HUMAN]	28.33	4	10	10	106	6.11843e+07	3.03101e+07	3.01844e+08	124.331	28.33	18	45	67.6989	23.33	13	23	87.007	23.15	17	38	540	60.6353	6.7124
P00751	Complement factor B OS=Homo sapiens GN=CFB PE=1 SV=2 - [CFAB_HUMAN]	27.88	2	18	18	430	1.87159e+08	4.19816e+08	6.89822e+08	152.359	18.46	21	81	543.728	27.88	33	281	107.836	18.85	25	68	764	85.4785	7.06396
P01609	Ig kappa chain V-I region Scw OS=Homo sapiens PE=1 SV=1 - [KV117_HUMAN]	27.78	6	1	2	569	2.01271e+08	3.75365e+08	2063884750	409.309	27.78	4	133	649.343	27.78	4	193	640.828	27.78	4	243	108	11.7568	5.99854
P02812	Basic salivary proline-rich protein 2 OS=Homo sapiens GN=PRB2 PE=1 SV=3 - [PRB2_HUMAN]	27.64	1	2	2	7	1.26618e+07	0	0	16.6693	27.64	2	7									416	40.7748	11.6343
P01860	Ig gamma-3 chain C region OS=Homo sapiens GN=IGHG3 PE=1 SV=2 - [IGHG3_HUMAN]	27.59	1	3	9	1492	3.67868e+09	6.24385e+09	7.26602e+09	508.485	27.59	15	334	1229.19	27.59	16	839	402.008	24.4	15	319	377	41.2604	7.89893
P01716	Ig lambda chain V-IV region X OS=Homo sapiens PE=1 SV=1 - [LV402_HUMAN]	27.36	1	2	2	33	2.32609e+07	4.29169e+07	7.61503e+07	30.2301	23.58	2	9	32.4785	27.36	3	12	28.6383	27.36	3	12	106	11.3273	4.58936
P13646	Keratin, type I cytoskeletal 13 OS=Homo sapiens GN=KRT13 PE=1 SV=4 - [K1C13_HUMAN]	27.29	6	5	11	173	2.78803e+08	7.83687e+07	5.95066e+08	128.7	15.72	16	65	133.806	8.52	8	66	71.3916	27.07	17	42	458	49.5574	4.95752
P18135	Ig kappa chain V-III region HAH OS=Homo sapiens PE=2 SV=1 - [KV312_HUMAN]	27.13	1	1	2	120	8.09878e+07	8.24827e+08	2.69316e+08	119.151	27.13	4	42	180.745	27.13	4	55	74.6554	27.13	3	23	129	14.0641	7.95752
P61769	Beta-2-microglobulin OS=Homo sapiens GN=B2M PE=1 SV=1 - [B2MG_HUMAN]	26.89	1	2	2	37	2.92559e+06	5.49623e+07	1.04656e+07	23.7055	26.89	4	12	47.2392	26.89	4	16	15.1336	26.89	4	9	119	13.7059	6.52197
P01598	Ig kappa chain V-I region EU OS=Homo sapiens PE=1 SV=1 - [KV106_HUMAN]	26.85	2	2	2	340	7.95468e+07	6.10798e+07	6.9854e+08	272.441	26.85	4	95	427.868	26.85	4	145	278.771	26.85	4	100	108	11.7808	8.44092
P02810	Salivary acidic proline-rich phosphoprotein 1/2 OS=Homo sapiens GN=PRH1 PE=1 SV=2 - [PRPC_HUMAN]	26.51	1	1	1	12	7.61884e+07	3.8941e+07	7.86332e+06	19.8961	26.51	1	9	0	26.51	1	1	0	26.51	1	2	166	17.0063	4.84326
P01765	Ig heavy chain V-III region TIL OS=Homo sapiens PE=1 SV=1 - [HV304_HUMAN]	26.09	5	2	2	1042	2.73192e+09	2.61595e+09	1.66675e+10	682.165	26.09	4	246	1242.97	26.09	4	463	837.816	26.09	4	333	115	12.3481	9.12939
P80419	Ig heavy chain V-III region GAR OS=Homo sapiens PE=1 SV=1 - [HV322_HUMAN]	25.42	1	2	2	114	4.33602e+07	1.09505e+08	2.41578e+08	66.3417	25.42	4	31	103.288	25.42	4	51	64.1143	25.42	4	32	118	13.0792	4.80518
P04114	Apolipoprotein B-100 OS=Homo sapiens GN=APOB PE=1 SV=2 - [APOB_HUMAN]	25.36	1	80	82	1144	9.37356e+07	1.28146e+08	3.45613e+08	928.981	20.53	128	350	1202.75	22.31	137	463	760.24	19.7	126	331	4563	515.283	7.04932
P05543	Thyroxine-binding globulin OS=Homo sapiens GN=SERPINA7 PE=1 SV=2 - [THBG_HUMAN]	25.3	1	6	7	95	7.51349e+07	2.50995e+07	3.66758e+08	38.897	17.83	7	14	116.128	25.3	11	55	57.2087	20.48	9	26	415	46.2946	6.30322
P09871	Complement C1s subcomponent OS=Homo sapiens GN=C1S PE=1 SV=1 - [C1S_HUMAN]	25.29	1	14	14	268	8.85281e+07	8.26046e+07	6.92584e+08	142.657	21.37	22	66	281.331	24.42	21	131	157.096	21.66	23	71	688	76.6348	4.95752
P19827	Inter-alpha-trypsin inhibitor heavy chain H1 OS=Homo sapiens GN=ITIH1 PE=1 SV=3 - [ITIH1_HUMAN]	25.14	1	13	13	264	2.60582e+08	3.03473e+08	1.13002e+09	169.373	14.71	17	59	461.485	25.14	24	151	155.418	14.71	17	54	911	101.326	6.78564
P01766	Ig heavy chain V-III region BRO OS=Homo sapiens PE=1 SV=1 - [HV305_HUMAN]	25	2	1	2	1291	3.4159e+09	5533193658	17871993458	1214.85	25	4	382	1575.02	25	4	515	1137.71	25	4	394	120	13.2184	6.56592
P01714	Ig lambda chain V-III region SH OS=Homo sapiens PE=1 SV=1 - [LV301_HUMAN]	25	1	2	2	242	1.21769e+08	1.93287e+09	1.40006e+09	94.7618	25	4	30	441.743	25	4	142	202.284	25	4	70	108	11.3856	6.52197
P01608	Ig kappa chain V-I region Roy OS=Homo sapiens PE=1 SV=1 - [KV116_HUMAN]	24.07	6	1	2	567	2.01466e+08	3.6157e+08	2.06569e+09	398.289	24.07	4	133	627.464	24.07	4	191	624.979	24.07	4	243	108	11.7748	5.36377
P10643	Complement component C7 OS=Homo sapiens GN=C7 PE=1 SV=2 - [CO7_HUMAN]	23.96	1	12	12	133	2.5289e+07	6.27422e+07	1.40053e+08	50.2819	7.83	10	23	203.142	22.18	18	80	69.2652	12.93	12	30	843	93.4573	6.48096
P07360	Complement component C8 gamma chain OS=Homo sapiens GN=C8G PE=1 SV=3 - [CO8G_HUMAN]	23.76	1	3	3	23	1.3837e+07	2.01893e+07	4.42684e+07	25.2033	15.84	4	8	27.6593	23.76	6	9	19.559	15.84	4	6	202	22.2635	8.30908
P0CG48	Polyubiquitin-C OS=Homo sapiens GN=UBC PE=1 SV=2 - [UBC_HUMAN]	23.65	4	2	2	6	8.04713e+06	0	2.91233e+07	8.81207	23.65	4	4					6.09672	21.02	2	2	685	76.9815	7.66455
P06889	Ig lambda chain V-IV region MOL OS=Homo sapiens PE=1 SV=1 - [LV405_HUMAN]	23.58	1	1	1	34	1.44328e+08	1.40303e+08	4.63169e+08	18.5075	23.58	2	6	42.7855	23.58	2	21	14.2662	23.58	2	7	106	11.2648	4.42432
P01781	Ig heavy chain V-III region GAL OS=Homo sapiens PE=1 SV=1 - [HV320_HUMAN]	23.28	2	2	2	171	1.11747e+08	1.78275e+08	6.29937e+08	89.7724	23.28	4	36	181.214	23.28	4	73	119.407	23.28	4	62	116	12.7222	8.48486
P05156	Complement factor I OS=Homo sapiens GN=CFI PE=1 SV=2 - [CFAI_HUMAN]	23.16	1	10	10	226	1.25299e+08	5.48444e+07	7.9505e+08	168.882	23.16	19	55	249.54	20.41	18	89	214.512	23.16	20	82	583	65.7066	7.50342
Q9HCY8	Protein S100-A14 OS=Homo sapiens GN=S100A14 PE=1 SV=1 - [S10AE_HUMAN]	23.08	1	2	2	4	1.1127e+06	0	0	9.61884	23.08	4	4									104	11.6548	5.23682
P04792	Heat shock protein beta-1 OS=Homo sapiens GN=HSPB1 PE=1 SV=2 - [HSPB1_HUMAN]	22.93	1	2	2	3	6.58512e+06	0	0	9.27401	22.93	3	3									205	22.7685	6.40479
P04278	Sex hormone-binding globulin OS=Homo sapiens GN=SHBG PE=1 SV=2 - [SHBG_HUMAN]	22.64	2	4	5	21	1.99411e+07	4.25529e+06	3.26166e+07	17.2747	10.45	3	5	46.7613	12.19	6	13	12.9663	5.72	1	3	402	43.7518	6.7124
P10163	Basic salivary proline-rich protein 4 OS=Homo sapiens GN=PRB4 PE=1 SV=3 - [PRB4_HUMAN]	22.58	1	1	1	1	6.78368e+06	0	0	3.84747	22.58	1	1									310	31.3328	10.521
P24592	Insulin-like growth factor-binding protein 6 OS=Homo sapiens GN=IGFBP6 PE=1 SV=1 - [IBP6_HUMAN]	22.5	1	2	2	6	3.12689e+06	3.89895e+06	1.6336e+07	6.7763	12.08	2	2	12.0052	22.5	3	3	3.22591	12.08	1	1	240	25.3062	7.81104
P43652	Afamin OS=Homo sapiens GN=AFM PE=1 SV=1 - [AFAM_HUMAN]	22.37	1	10	10	212	6.02787e+07	8.61894e+07	3.19195e+08	140.392	16.19	13	60	295.715	17.7	18	108	110.703	14.52	11	44	599	69.024	5.89697
P01743	Ig heavy chain V-I region HG3 OS=Homo sapiens PE=4 SV=1 - [HV102_HUMAN]	22.22	1	2	2	337	1.00269e+08	6.03919e+08	1.64209e+09	140.126	22.22	4	73	335.456	22.22	4	151	204.176	22.22	4	113	117	12.9373	8.92432
P01625	Ig kappa chain V-IV region Len OS=Homo sapiens PE=1 SV=2 - [KV402_HUMAN]	21.93	4	1	2	32	9.42698e+06	1.34759e+07	5.71608e+07	23.4746	21.93	3	10	6.16053	21.93	3	5	35.5986	21.93	4	17	114	12.6322	7.92822
P00736	Complement C1r subcomponent OS=Homo sapiens GN=C1R PE=1 SV=2 - [C1R_HUMAN]	21.84	1	9	10	262	3.53072e+07	6.50535e+07	9.25663e+07	185.909	18.3	14	74	287.921	18.16	17	112	218.4	16.74	15	76	705	80.0668	6.21436
P22352	Glutathione peroxidase 3 OS=Homo sapiens GN=GPX3 PE=1 SV=2 - [GPX3_HUMAN]	21.68	1	4	4	104	3.02234e+07	4.09699e+07	4.23499e+08	65.7283	21.68	8	35	117.03	18.14	6	44	51.3778	21.68	7	25	226	25.5369	8.1333
A6NDP1	Putative V-set and immunoglobulin domain-containing protein 7 OS=Homo sapiens GN=VSIG7 PE=5 SV=1 - [VSIG7_HUMAN]	21.67	2	2	2	26	2.53071e+07	6.34822e+06	1.33536e+08	12.0539	21.67	4	10	0	9.17	1	3	7.71628	21.67	4	13	120	13.2923	8.08936
P01616	Ig kappa chain V-II region MIL OS=Homo sapiens PE=1 SV=1 - [KV203_HUMAN]	21.43	1	1	1	21	6.50302e+07	1.46118e+08	5.85903e+07	19.9507	21.43	2	6	29.6717	21.43	2	10	16.4675	21.43	2	5	112	12.0481	9.29053
P07225	Vitamin K-dependent protein S OS=Homo sapiens GN=PROS1 PE=1 SV=1 - [PROS_HUMAN]	21.15	1	10	10	84	2.56255e+07	4.54845e+07	1.14999e+08	59.2499	18.34	15	23	85.6197	17.6	15	32	78.5677	20.71	17	29	676	75.0739	5.66846
P10599	Thioredoxin OS=Homo sapiens GN=TXN PE=1 SV=3 - [THIO_HUMAN]	20.95	1	2	2	3	1153559	0	6.67299e+06	1.61339	8.57	1	1					5.63661	12.38	2	2	105	11.7297	4.91943
Q96PD5	N-acetylmuramoyl-L-alanine amidase OS=Homo sapiens GN=PGLYRP2 PE=1 SV=1 - [PGRP2_HUMAN]	20.66	2	7	7	87	1.51931e+07	2.34958e+07	7.46962e+07	75.0829	20.66	12	33	68.8102	10.24	7	30	39.9897	16.49	10	24	576	62.1779	7.54736
P02743	Serum amyloid P-component OS=Homo sapiens GN=APCS PE=1 SV=2 - [SAMP_HUMAN]	20.63	1	6	6	438	5.27793e+08	4.06253e+08	2.82552e+09	361.071	20.63	12	152	347.524	20.63	12	132	310.476	20.63	12	154	223	25.3711	6.53662
P02751-10	Isoform 10 of Fibronectin OS=Homo sapiens GN=FN1 - [FINC_HUMAN]	20.59	15	30	30	789	2.65374e+08	2.75052e+08	8.17451e+08	647.56	19.16	51	219	1178.51	19.3	53	387	508.776	17	42	183	2176	239.476	5.88428
Q9BXR6	Complement factor H-related protein 5 OS=Homo sapiens GN=CFHR5 PE=1 SV=1 - [FHR5_HUMAN]	20.56	1	8	9	84	1.24724e+07	5.4312e+07	87610604	41.1573	15.29	11	15	123.567	18.1	16	48	38.1902	16.34	14	21	569	64.3771	7.06396
P08670	Vimentin OS=Homo sapiens GN=VIM PE=1 SV=4 - [VIME_HUMAN]	19.96	1	7	7	85	1.09732e+07	6.9489e+06	0	165.859	18.03	11	67	21.1127	7.51	6	18					466	53.6191	5.12256
P00746	Complement factor D OS=Homo sapiens GN=CFD PE=1 SV=5 - [CFAD_HUMAN]	19.76	1	3	3	32	1.17467e+07	4.27179e+07	4.73017e+07	33.1011	19.76	5	8	47.9066	19.76	6	12	44.605	19.76	5	12	253	27.0159	7.7085
P55064	Aquaporin-5 OS=Homo sapiens GN=AQP5 PE=1 SV=1 - [AQP5_HUMAN]	19.62	1	1	1	2	0	0	0	0	19.62	1	2									265	28.2741	8.6167
P05109	Protein S100-A8 OS=Homo sapiens GN=S100A8 PE=1 SV=1 - [S10A8_HUMAN]	19.35	1	2	2	20	3.24734e+07	5.79928e+07	2.13066e+08	18.1759	11.83	2	6	25.9189	19.35	4	10	9.07781	11.83	2	4	93	10.8276	7.03467
P03952	Plasma kallikrein OS=Homo sapiens GN=KLKB1 PE=1 SV=1 - [KLKB1_HUMAN]	19.28	1	9	9	111	3.61634e+07	1.2235e+08	2.86569e+08	61.4123	12.7	9	23	165.103	19.28	17	67	36.8691	11.44	9	21	638	71.3228	8.22119
P09382	Galectin-1 OS=Homo sapiens GN=LGALS1 PE=1 SV=2 - [LEG1_HUMAN]	19.26	1	1	1	1	0	0	610925									6.04377	19.26	1	1	135	14.7062	5.50342
P05154	Plasma serine protease inhibitor OS=Homo sapiens GN=SERPINA5 PE=1 SV=3 - [IPSP_HUMAN]	19.21	1	5	6	43	5.43124e+06	1.06694e+07	4.54049e+07	20.5528	7.88	6	10	29.1026	16.01	9	11	45.6947	15.02	9	22	406	45.6457	9.26123
P01034	Cystatin-C OS=Homo sapiens GN=CST3 PE=1 SV=1 - [CYTC_HUMAN]	19.18	1	2	2	7	1.17302e+07	0	1.84306e+07	5.66608	19.18	4	4					4.37147	19.18	3	3	146	15.7891	8.74854
Q9HDC9-2	Isoform 2 of Adipocyte plasma membrane-associated protein OS=Homo sapiens GN=APMAP - [APMAP_HUMAN]	19.03	2	4	4	17	3.74793e+06	4.55548e+06	2.17667e+07	21.4731	19.03	7	7	5.07594	4.15	2	2	18.9653	11.07	6	8	289	32.1407	5.84619
P07357	Complement component C8 alpha chain OS=Homo sapiens GN=C8A PE=1 SV=2 - [CO8A_HUMAN]	18.66	1	8	8	116	4.03116e+07	4.22608e+07	2.22393e+08	78.7883	15.75	14	37	106.264	18.66	15	49	52.8825	15.58	14	30	584	65.121	6.46826
Q7Z794	Keratin, type II cytoskeletal 1b OS=Homo sapiens GN=KRT77 PE=1 SV=3 - [K2C1B_HUMAN]	18.51	2	9	11	70	2.67766e+07	4.36372e+07	1.807e+07	76.7434	18.51	20	37	39.5908	3.29	4	16	35.1484	9.17	10	17	578	61.8635	5.98584
P04040	Catalase OS=Homo sapiens GN=CAT PE=1 SV=3 - [CATA_HUMAN]	18.41	1	8	8	56	9.85289e+06	1.4137e+07	4.89778e+07	33.7409	12.52	11	14	57.8052	18.41	15	22	44.8334	12.52	11	20	527	59.7188	7.38623
P01744	Ig heavy chain V-I region ND (Fragments) OS=Homo sapiens PE=1 SV=2 - [HV104_HUMAN]	18.37	1	1	2	10	732561	5.45401e+06	0	0	7.48	1	1	0	18.37	2	7	0	7.48	1	2	147	16.4806	7.38623
Q14520	Hyaluronan-binding protein 2 OS=Homo sapiens GN=HABP2 PE=1 SV=1 - [HABP2_HUMAN]	18.21	1	7	7	125	1.1614e+08	6.32874e+07	3.91483e+08	84.5149	16.96	11	35	112.628	15	11	49	85.5838	16.96	11	41	560	62.6304	6.53662
P04003	C4b-binding protein alpha chain OS=Homo sapiens GN=C4BPA PE=1 SV=2 - [C4BPA_HUMAN]	18.09	1	10	10	173	2.12886e+08	1.47777e+08	6.23271e+08	85.6787	11.39	11	38	186.294	15.08	16	82	102.943	18.09	19	53	597	66.9894	7.29834
Q9UGM5	Fetuin-B OS=Homo sapiens GN=FETUB PE=1 SV=2 - [FETUB_HUMAN]	18.06	1	3	4	37	6.7452e+07	1.31865e+07	1.75391e+08	29.5247	12.57	3	9	51.3664	12.57	3	14	51.7317	18.06	5	14	382	42.028	6.82959
P06318	Ig lambda chain V-VI region WLT OS=Homo sapiens PE=1 SV=1 - [LV604_HUMAN]	18.02	2	1	1	16	3.06611e+06	6.05647e+07	1.24621e+07	8.15362	18.02	2	2	44.196	18.02	2	12	4.28777	18.02	2	2	111	11.9586	4.77979
P19823	Inter-alpha-trypsin inhibitor heavy chain H2 OS=Homo sapiens GN=ITIH2 PE=1 SV=2 - [ITIH2_HUMAN]	17.97	1	12	12	230	5.80932e+07	1.05966e+08	4.04651e+08	124.034	12.26	17	58	282.466	16.38	21	124	89.4187	9.62	14	48	946	106.397	6.85889
P01717	Ig lambda chain V-IV region Hil OS=Homo sapiens PE=1 SV=1 - [LV403_HUMAN]	17.76	1	1	1	49	1.59724e+07	9.3758e+07	3.10454e+07	68.1524	17.76	2	20	62.0445	17.76	2	18	39.1436	17.76	2	11	107	11.5096	6.50732
P01615	Ig kappa chain V-II region FR OS=Homo sapiens PE=1 SV=1 - [KV202_HUMAN]	17.7	1	1	2	67	2.0905e+08	3.8537e+08	4.82981e+08	26.0337	11.5	2	12	74.151	11.5	2	35	30.1059	17.7	4	20	113	12.6517	7.94287
P27169	Serum paraoxonase/arylesterase 1 OS=Homo sapiens GN=PON1 PE=1 SV=3 - [PON1_HUMAN]	17.46	1	4	4	75	3.15644e+07	5.99067e+07	1.53728e+08	74.2451	17.46	8	23	70.2449	11.27	6	25	78.675	17.46	8	27	355	39.7062	5.22412
O00187-2	Isoform 2 of Mannan-binding lectin serine protease 2 OS=Homo sapiens GN=MASP2 - [MASP2_HUMAN]	17.3	2	3	3	18	8.22602e+06	1.61776e+06	1.79041e+07	17.161	16.76	4	6	6.61482	8.11	2	2	21.0767	17.3	5	10	185	20.6159	5.96045
P32119	Peroxiredoxin-2 OS=Homo sapiens GN=PRDX2 PE=1 SV=5 - [PRDX2_HUMAN]	17.17	1	3	3	20	1.03864e+07	937792	2.60342e+07	18.6389	13.13	4	8	6.36452	8.59	2	2	15.1661	17.17	6	10	198	21.8782	5.97314
P06331	Ig heavy chain V-II region ARH-77 OS=Homo sapiens PE=4 SV=1 - [HV209_HUMAN]	17.12	2	2	2	107	1.16679e+07	9.31302e+07	2.22892e+07	115.597	17.12	4	44	127.374	17.12	4	43	48.4782	17.12	4	20	146	16.2181	8.27979
P01742	Ig heavy chain V-I region EU OS=Homo sapiens PE=1 SV=1 - [HV101_HUMAN]	17.09	1	1	1	2	9.76884e+06	0	0	2.88564	17.09	1	2									117	12.4641	6.56592
P02763	Alpha-1-acid glycoprotein 1 OS=Homo sapiens GN=ORM1 PE=1 SV=1 - [A1AG1_HUMAN]	16.92	2	3	3	24	2.36132e+07	8.64571e+06	1.26218e+08	20.1774	9.95	4	8	20.5007	10.95	4	8	16.1526	9.95	4	8	201	23.4968	5.021
Q9BWW8	Apolipoprotein L6 OS=Homo sapiens GN=APOL6 PE=1 SV=1 - [APOL6_HUMAN]	16.91	1	0	1	3	0	98371.8	0					0	16.91	1	3					343	38.1038	8.35303
P01031	Complement C5 OS=Homo sapiens GN=C5 PE=1 SV=4 - [CO5_HUMAN]	16.83	1	16	17	192	4.89628e+07	5.13881e+07	1.76189e+08	152.344	11.52	25	55	204.748	12.05	26	75	157.556	13.01	25	62	1676	188.186	6.52197
P06733	Alpha-enolase OS=Homo sapiens GN=ENO1 PE=1 SV=2 - [ENOA_HUMAN]	16.82	6	6	6	25	9.1976e+06	3.56215e+06	1.0666e+07	14.4043	10.37	7	8	25.397	10.37	5	8	16.7094	13.36	8	9	434	47.1393	7.38623
P15169	Carboxypeptidase N catalytic chain OS=Homo sapiens GN=CPN1 PE=1 SV=1 - [CBPN_HUMAN]	16.81	1	4	4	19	3.24137e+06	1.87267e+07	3.58137e+07	5.26259	1.31	1	3	38.6169	16.81	6	13	3.30941	1.31	1	3	458	52.2533	7.34229
Q15485-2	Isoform 2 of Ficolin-2 OS=Homo sapiens GN=FCN2 - [FCN2_HUMAN]	16.73	2	3	3	21	2.70335e+07	2.47806e+07	9.73127e+07	25.1489	8.36	4	8	7.87292	11.64	3	3	28.2951	8.36	4	10	275	30.2085	6.29053
P01597	Ig kappa chain V-I region DEE OS=Homo sapiens PE=1 SV=1 - [KV105_HUMAN]	16.67	1	1	1	286	3.63003e+08	7.00865e+08	4.12261e+09	250.085	16.67	2	65	384.015	16.67	1	91	449.299	16.67	2	130	108	11.6538	9.36377
P01605	Ig kappa chain V-I region Lay OS=Homo sapiens PE=1 SV=1 - [KV113_HUMAN]	16.67	1	1	1	215	4.66885e+07	6.98881e+07	1.97601e+08	145.774	16.67	2	67	107.788	16.67	2	43	203.931	16.67	2	105	108	11.8268	7.95752
P01606	Ig kappa chain V-I region OU OS=Homo sapiens PE=1 SV=1 - [KV114_HUMAN]	16.67	1	1	1	3	552037	0	2.48136e+06	2.09975	16.67	2	2					0	16.67	1	1	108	11.7697	9.90576
P04430	Ig kappa chain V-I region BAN OS=Homo sapiens PE=1 SV=1 - [KV122_HUMAN]	16.67	1	1	1	257	9.52911e+06	2.49958e+07	1.34963e+08	121.431	16.67	2	74	161.738	16.67	2	76	187.114	16.67	2	107	108	11.8328	8.44092
P62318	Small nuclear ribonucleoprotein Sm D3 OS=Homo sapiens GN=SNRPD3 PE=1 SV=1 - [SMD3_HUMAN]	16.67	1	1	1	1	1794527	0	0	3.51638	16.67	1	1									126	13.9073	10.3159
P13760	HLA class II histocompatibility antigen, DRB1-4 beta chain OS=Homo sapiens GN=HLA-DRB1 PE=1 SV=1 - [2B14_HUMAN]	16.54	9	1	2	9	815488	0	0	18.1901	16.54	3	9									266	30.093	7.18115
P01780	Ig heavy chain V-III region JON OS=Homo sapiens PE=1 SV=1 - [HV319_HUMAN]	16.52	1	1	1	4	3.66235e+06	6.4217e+06	0	1.99845	16.52	1	1	8.37832	16.52	1	3					115	12.5553	9.29053
P01612	Ig kappa chain V-I region Mev OS=Homo sapiens PE=1 SV=1 - [KV120_HUMAN]	16.51	1	1	1	79	7.68472e+06	1.92083e+07	1.02804e+08	76.4976	16.51	2	23	77.3542	16.51	2	26	68.7244	16.51	2	30	109	11.8628	6.56592
P01624	Ig kappa chain V-III region POM OS=Homo sapiens PE=1 SV=1 - [KV306_HUMAN]	16.51	1	1	1	82	4.60997e+07	2.40705e+08	1.27097e+09	41.436	16.51	2	22	102.454	16.51	2	34	42.1503	16.51	2	26	109	11.9149	8.93896
P01778	Ig heavy chain V-III region ZAP OS=Homo sapiens PE=1 SV=1 - [HV317_HUMAN]	16.38	1	1	1	6	1.48075e+07	1.55241e+07	1.59098e+08	0	16.38	1	1	4.34087	16.38	2	3	4.47625	16.38	2	2	116	12.5741	8.51416
Q15113	Procollagen C-endopeptidase enhancer 1 OS=Homo sapiens GN=PCOLCE PE=1 SV=2 - [PCOC1_HUMAN]	16.26	1	6	6	55	2.95478e+06	6.88224e+06	4.09673e+07	27.8934	10.69	8	10	40.0039	12.03	8	23	38.9381	16.26	12	22	449	47.942	7.43018
P02656	Apolipoprotein C-III OS=Homo sapiens GN=APOC3 PE=1 SV=1 - [APOC3_HUMAN]	16.16	1	1	1	26	5.57368e+06	7.07206e+06	7.96506e+07	16.1537	16.16	2	4	41.4877	16.16	2	12	33.3941	16.16	2	10	99	10.8455	5.41455
O43790	Keratin, type II cuticular Hb6 OS=Homo sapiens GN=KRT86 PE=1 SV=1 - [KRT86_HUMAN]	16.05	2	2	9	34	7.00564e+06	11782004	5.10208e+06	47.3968	13.58	14	20	4.03186	1.44	2	2	24.0031	10.08	9	12	486	53.4663	5.65576
P30043	Flavin reductase (NADPH) OS=Homo sapiens GN=BLVRB PE=1 SV=3 - [BLVRB_HUMAN]	16.02	1	2	2	16	5.29459e+06	7.06879e+06	3.50523e+07	13.2642	16.02	3	5	16.5179	16.02	4	7	5.43029	6.8	2	4	206	22.1054	7.6499
Q9H2M9-2	Isoform 2 of Rab3 GTPase-activating protein non-catalytic subunit OS=Homo sapiens GN=RAB3GAP2 - [RBGPR_HUMAN]	16.02	2	0	1	2	0	2.83244e+06	0					0	16.02	1	2					206	23.3464	4.79248
P01621	Ig kappa chain V-III region NG9 (Fragment) OS=Homo sapiens PE=1 SV=1 - [KV303_HUMAN]	16	1	1	1	19	1.86555e+07	4.04526e+07	3.81175e+07	17.4655	16	2	6	22.3532	16	2	8	14.8195	16	2	5	100	10.7223	6.52197
Q8NBU9	Placenta-specific protein 2 OS=Homo sapiens GN=PLAC2 PE=2 SV=2 - [PLAC2_HUMAN]	15.89	1	1	1	1	3.43469e+07	0	0	0	15.89	1	1									151	16.0982	8.03076
P35858	Insulin-like growth factor-binding protein complex acid labile subunit OS=Homo sapiens GN=IGFALS PE=1 SV=1 - [ALS_HUMAN]	15.87	1	6	7	96	2.93645e+07	1.40804e+07	7.86609e+07	61.3388	11.9	9	23	169.648	14.55	12	54	45.1193	9.59	7	19	605	65.9938	6.78564
Q96KN2	Beta-Ala-His dipeptidase OS=Homo sapiens GN=CNDP1 PE=1 SV=4 - [CNDP1_HUMAN]	15.78	1	6	6	57	2.49443e+07	1.61886e+07	96326416	44.1054	11.83	8	21	37.4814	13.61	9	17	26.3383	14	9	19	507	56.6701	5.30029
P69891	Hemoglobin subunit gamma-1 OS=Homo sapiens GN=HBG1 PE=1 SV=2 - [HBG1_HUMAN]	15.65	3	1	2	34	4.54816e+06	9.27372e+06	4.22562e+07	11.9847	15.65	4	4	47.714	15.65	4	28	6.74922	8.84	2	2	147	16.1303	7.1958
P04070	Vitamin K-dependent protein C OS=Homo sapiens GN=PROC PE=1 SV=1 - [PROC_HUMAN]	15.62	1	3	3	32	9.31218e+06	5.16632e+06	4.35354e+07	27.9759	15.62	5	8	21.8864	1.52	2	12	39.2573	15.62	4	12	461	52.0375	6.27783
P05155	Plasma protease C1 inhibitor OS=Homo sapiens GN=SERPING1 PE=1 SV=2 - [IC1_HUMAN]	15.6	1	6	6	354	2.79521e+08	3.28871e+08	2.62201e+09	198.2	15.6	11	67	437.25	15.6	11	168	229.556	13.4	9	119	500	55.1194	6.55127
Q06033-2	Isoform 2 of Inter-alpha-trypsin inhibitor heavy chain H3 OS=Homo sapiens GN=ITIH3 - [ITIH3_HUMAN]	15.58	2	10	10	189	4.53927e+07	1.53885e+08	2.98913e+08	129.544	14.22	17	42	246.071	15.58	19	94	112.329	15.58	20	53	886	99.2653	5.79541
P04434	Ig kappa chain V-III region VH (Fragment) OS=Homo sapiens PE=4 SV=1 - [KV310_HUMAN]	15.52	1	1	1	68	2.19131e+08	1.06299e+09	837735003	35.6728	15.52	2	12	107.227	15.52	2	35	55.1298	15.52	2	21	116	12.7494	5.93506
P11021	78 kDa glucose-regulated protein OS=Homo sapiens GN=HSPA5 PE=1 SV=2 - [GRP78_HUMAN]	15.44	3	6	8	26	5.74014e+06	0	2.58323e+07	18.2583	7.34	8	9					37.1314	15.44	15	17	654	72.2884	5.16064
P00740	Coagulation factor IX OS=Homo sapiens GN=F9 PE=1 SV=2 - [FA9_HUMAN]	15.4	1	4	4	51	4.05049e+07	1.23521e+07	1.26161e+08	56.3342	15.4	8	23	27.6871	6.94	4	13	37.1695	15.4	8	15	461	51.745	5.46533
P01619	Ig kappa chain V-III region B6 OS=Homo sapiens PE=1 SV=1 - [KV301_HUMAN]	14.81	1	1	1	31	8.7321e+06	1.49466e+08	2.76922e+07	42.5065	14.81	2	12	35.0387	14.81	2	10	29.5675	14.81	2	9	108	11.6278	9.24658
P01833	Polymeric immunoglobulin receptor OS=Homo sapiens GN=PIGR PE=1 SV=4 - [PIGR_HUMAN]	14.79	1	8	8	108	4.21261e+07	1.98544e+07	2.26205e+08	76.9684	11.26	11	26	115.876	11.13	9	44	92.1183	14.79	15	38	764	83.2317	5.74463
Q8N1N4	Keratin, type II cytoskeletal 78 OS=Homo sapiens GN=KRT78 PE=2 SV=2 - [K2C78_HUMAN]	14.62	4	4	7	21	2.86167e+06	7.21344e+06	1.71125e+06	35.0543	11.35	12	16	4.51164	5.58	3	3	4.90225	1.73	2	2	520	56.8305	6.02393
P04075	Fructose-bisphosphate aldolase A OS=Homo sapiens GN=ALDOA PE=1 SV=2 - [ALDOA_HUMAN]	14.56	1	3	3	5	0	81480.9	4.43012e+06					3.63798	8.24	1	1	8.28525	6.32	4	4	364	39.3953	8.08936
Q86XW9-2	Isoform 2 of Thioredoxin domain-containing protein 6 OS=Homo sapiens GN=NME9 - [TXND6_HUMAN]	14.45	3	2	2	11	0	2.70066e+07	0	0	6.46	1	1	0	14.45	2	9	0	6.46	1	1	263	29.6636	4.98291
Q15323	Keratin, type I cuticular Ha1 OS=Homo sapiens GN=KRT31 PE=2 SV=3 - [K1H1_HUMAN]	14.42	12	5	6	100	1.9643e+08	1.28872e+08	2.99028e+08	58.8958	11.78	10	36	64.8049	1.68	2	42	16.4874	8.65	7	22	416	47.2071	4.88135
P06314	Ig kappa chain V-IV region B17 OS=Homo sapiens PE=2 SV=1 - [KV404_HUMAN]	14.18	4	1	2	30	2.71722e+06	2.35949e+06	2.84105e+07	23.3191	14.18	3	13	6.16053	5.22	2	4	16.4732	14.18	4	13	134	14.9565	6.58057
Q8WWZ3-2	Isoform B of Ectodysplasin-A receptor-associated adapter protein OS=Homo sapiens GN=EDARADD - [EDAD_HUMAN]	14.15	2	1	1	1	158732	0	0	0	14.15	1	1									205	23.6743	4.97021
Q15828	Cystatin-M OS=Homo sapiens GN=CST6 PE=1 SV=1 - [CYTM_HUMAN]	14.09	1	1	1	2	0	0	26322738									6.25208	14.09	2	2	149	16.5004	8.08936
O14791	Apolipoprotein L1 OS=Homo sapiens GN=APOL1 PE=1 SV=5 - [APOL1_HUMAN]	14.07	2	4	4	76	3.00656e+07	3.11772e+07	1.35554e+08	53.8792	14.07	6	15	125.191	12.06	6	41	49.7018	14.07	7	20	398	43.9469	5.80811
P78385	Keratin, type II cuticular Hb3 OS=Homo sapiens GN=KRT83 PE=1 SV=2 - [KRT83_HUMAN]	14	3	1	8	32	7.00564e+06	11782004	4.41162e+06	44.4792	11.56	12	18	4.03186	1.42	2	2	23.5513	9.94	9	12	493	54.1605	5.64307
P13671	Complement component C6 OS=Homo sapiens GN=C6 PE=1 SV=3 - [CO6_HUMAN]	13.92	1	8	8	76	1.28112e+07	1.00984e+08	9.59157e+07	56.7515	7.92	9	17	125.554	12.74	13	36	72.1065	6.75	8	23	934	104.718	6.75635
Q92496	Complement factor H-related protein 4 OS=Homo sapiens GN=CFHR4 PE=1 SV=2 - [FHR4_HUMAN]	13.9	2	3	4	21	9.70439e+06	5.36003e+06	7.45969e+07	18.9868	8.76	6	8	4.98675	2.42	2	2	21.0129	13.9	7	11	331	37.2744	5.26221
P01344	Insulin-like growth factor II OS=Homo sapiens GN=IGF2 PE=1 SV=1 - [IGF2_HUMAN]	13.89	2	2	2	27	2.84677e+07	7.38941e+07	3.79079e+07	16.6282	13.89	4	5	36.14	13.89	4	14	19.2885	13.89	4	8	180	20.1273	9.31982
Q9BWP8-8	Isoform 8 of Collectin-11 OS=Homo sapiens GN=COLEC11 - [COL11_HUMAN]	13.71	9	2	2	9	8.30165e+06	0	3.89185e+07	4.48476	5.08	2	2					11.5174	13.71	4	7	197	21.5751	4.75439
Q08380	Galectin-3-binding protein OS=Homo sapiens GN=LGALS3BP PE=1 SV=1 - [LG3BP_HUMAN]	13.68	1	5	5	89	3.12453e+07	3.50179e+07	7.63792e+07	93.4024	13.68	9	31	54.2506	13.68	9	19	99.555	13.68	9	39	585	65.2893	5.2749
P16035	Metalloproteinase inhibitor 2 OS=Homo sapiens GN=TIMP2 PE=1 SV=2 - [TIMP2_HUMAN]	13.64	1	2	2	5	2.49136e+06	7.2816e+06	0	0	6.82	1	1	6.90297	13.64	4	4					220	24.3831	7.48877
P01770	Ig heavy chain V-III region NIE OS=Homo sapiens PE=1 SV=1 - [HV309_HUMAN]	13.45	1	1	1	9	9.15152e+06	9.38287e+06	2.50925e+07	7.17024	13.45	2	3	12.6896	13.45	2	4	4.19689	13.45	1	2	119	13.234	9.71533
P11142-2	Isoform 2 of Heat shock cognate 71 kDa protein OS=Homo sapiens GN=HSPA8 - [HSP7C_HUMAN]	13.39	3	2	5	20	7.89263e+06	2.47327e+07	1.52483e+07	30.6993	10.14	8	12	5.19312	2.03	2	2	15.1029	8.11	6	6	493	53.4844	5.85889
P05089	Arginase-1 OS=Homo sapiens GN=ARG1 PE=1 SV=2 - [ARGI1_HUMAN]	13.35	3	4	4	15	6.83847e+06	1.48492e+06	1.03803e+07	15.7415	13.35	7	7	5.51069	3.42	2	2	8.90739	6.83	4	6	322	34.7133	7.21045
P02654	Apolipoprotein C-I OS=Homo sapiens GN=APOC1 PE=1 SV=1 - [APOC1_HUMAN]	13.25	1	2	2	52	1.19276e+08	6.60727e+07	5.68487e+08	25.9682	13.25	4	13	36.237	13.25	4	24	19.9833	13.25	4	15	83	9.32609	8.47021
P06702	Protein S100-A9 OS=Homo sapiens GN=S100A9 PE=1 SV=1 - [S10A9_HUMAN]	13.16	1	1	1	6	5.7653e+06	0	22446698	6.50436	13.16	2	2	6.33279	13.16	2	2	8.65866	13.16	1	2	114	13.2335	6.12549
P02745	Complement C1q subcomponent subunit A OS=Homo sapiens GN=C1QA PE=1 SV=2 - [C1QA_HUMAN]	13.06	1	2	2	4	0	5.73536e+06	0					2.1955	4.08	2	2	3.48211	8.98	2	2	245	26.0002	9.11475
P20742	Pregnancy zone protein OS=Homo sapiens GN=PZP PE=1 SV=4 - [PZP_HUMAN]	12.89	2	15	16	146	1.1356e+07	3.12537e+07	5.62505e+07	104.861	11.74	24	37	224.464	11.54	23	75	76.1215	9.65	23	34	1482	163.76	6.37939
O75223	Gamma-glutamylcyclotransferase OS=Homo sapiens GN=GGCT PE=1 SV=1 - [GGCT_HUMAN]	12.77	1	2	2	5	1.49268e+06	0	4.88306e+06	8.24114	12.77	3	3					3.01153	6.91	2	2	188	20.9943	5.13525
P81605	Dermcidin OS=Homo sapiens GN=DCD PE=1 SV=2 - [DCD_HUMAN]	12.73	1	1	1	6	1.34041e+07	0	2.0985e+07	11.5341	12.73	2	4					6.71975	12.73	2	2	110	11.2768	6.53662
O75556	Mammaglobin-B OS=Homo sapiens GN=SCGB2A1 PE=1 SV=1 - [SG2A1_HUMAN]	12.63	1	1	1	1	1.17483e+06	0	0	2.32311	12.63	1	1									95	10.8763	5.78271
P18065	Insulin-like growth factor-binding protein 2 OS=Homo sapiens GN=IGFBP2 PE=1 SV=2 - [IBP2_HUMAN]	12.62	1	3	3	13	2.91207e+06	7.05335e+06	1.42011e+07	3.91623	4.92	1	1	19.2448	12.62	6	6	17.009	12.62	6	6	325	34.7912	7.50342
P14923	Junction plakoglobin OS=Homo sapiens GN=JUP PE=1 SV=3 - [PLAK_HUMAN]	12.62	2	7	7	35	9.09726e+06	2.28239e+07	6.1218e+06	34.4503	12.62	10	14	18.8416	2.55	3	12	16.4356	8.32	8	9	745	81.6927	6.13818
Q06830	Peroxiredoxin-1 OS=Homo sapiens GN=PRDX1 PE=1 SV=1 - [PRDX1_HUMAN]	12.56	1	1	2	4	3.66885e+06	0	2.40298e+08	5.05327	12.56	3	3					0	8.54	1	1	199	22.0963	8.1333
P19013	Keratin, type II cytoskeletal 4 OS=Homo sapiens GN=KRT4 PE=1 SV=4 - [K2C4_HUMAN]	12.55	6	2	7	90	6.42689e+07	2.31984e+07	2.98905e+08	87.9883	12.55	13	38	56.0446	5.06	6	28	47.1715	9.36	9	24	534	57.2498	6.60986
P06311	Ig kappa chain V-III region IARC/BL41 OS=Homo sapiens PE=1 SV=1 - [KV311_HUMAN]	12.5	1	1	1	2	0	1.29386e+07	0					5.60703	12.5	2	2					128	14.0611	6.60986
Q86Y46	Keratin, type II cytoskeletal 73 OS=Homo sapiens GN=KRT73 PE=1 SV=1 - [K2C73_HUMAN]	12.41	7	0	6	35	7.97643e+06	8.81327e+06	7.09267e+06	50.4244	9.07	10	22	13.1329	6.85	5	9	10.0016	4.44	4	4	540	58.8867	7.2251
P04207	Ig kappa chain V-III region CLL OS=Homo sapiens PE=1 SV=2 - [KV308_HUMAN]	12.4	1	1	1	11	1.33459e+07	5.90959e+07	2.14918e+07	9.01455	12.4	2	4	12.1142	12.4	2	4	6.85602	12.4	2	3	129	14.2662	8.51416
O95969	Secretoglobin family 1D member 2 OS=Homo sapiens GN=SCGB1D2 PE=2 SV=1 - [SG1D2_HUMAN]	12.22	1	1	1	2	0	0	3.96286e+06									0	12.22	2	2	90	9.91834	8.25049
Q04756	Hepatocyte growth factor activator OS=Homo sapiens GN=HGFAC PE=1 SV=1 - [HGFA_HUMAN]	12.21	1	7	7	60	1.94881e+07	4.06294e+06	8.21872e+07	33.2821	8.85	10	15	42.9857	6.56	8	22	39.8332	9.77	12	23	655	70.6361	7.23975
Q9NZP8	Complement C1r subcomponent-like protein OS=Homo sapiens GN=C1RL PE=1 SV=2 - [C1RL_HUMAN]	12.11	1	3	4	57	1.92188e+07	4.14937e+06	1.20448e+08	38.4406	6.78	4	16	42.2002	4.72	4	18	51.9319	10.27	5	23	487	53.4643	7.1958
Q8TAA1	Probable ribonuclease 11 OS=Homo sapiens GN=RNASE11 PE=2 SV=1 - [RNS11_HUMAN]	12.06	1	1	1	5	4.12856e+06	0	3.01272e+07	2.79576	12.06	1	1					4.78739	12.06	1	4	199	22.4119	6.52197
P63220	40S ribosomal protein S21 OS=Homo sapiens GN=RPS21 PE=1 SV=1 - [RS21_HUMAN]	12.05	1	1	1	4	261729	0	0	8.4479	12.05	2	4									83	9.10557	8.49951
P05160	Coagulation factor XIII B chain OS=Homo sapiens GN=F13B PE=1 SV=3 - [F13B_HUMAN]	11.95	1	4	4	31	2.35795e+07	8.18686e+07	1.45272e+08	44.9577	8.32	6	15	11.7818	2.87	2	4	31.6382	9.53	6	12	661	75.4612	6.39209
O60814	Histone H2B type 1-K OS=Homo sapiens GN=HIST1H2BK PE=1 SV=3 - [H2B1K_HUMAN]	11.9	14	1	1	4	3.3668e+06	3.03396e+06	0	7.05809	11.9	2	2	7.4708	11.9	2	2					126	13.8816	10.3159
P01707	Ig lambda chain V-II region TRO OS=Homo sapiens PE=1 SV=1 - [LV204_HUMAN]	11.71	1	1	1	16	3.58173e+06	6.58305e+06	10673569	21.732	11.71	2	10	1.91193	11.71	2	2	4.9176	11.71	2	4	111	11.5536	8.29443
O95428-3	Isoform 3 of Papilin OS=Homo sapiens GN=PAPLN - [PPN_HUMAN]	11.63	5	1	1	6	1.11882e+06	7444749	4.79217e+06	2.5278	11.63	2	2	3.09076	11.63	2	2	6.78498	11.63	2	2	129	14.359	8.92432
P19012	Keratin, type I cytoskeletal 15 OS=Homo sapiens GN=KRT15 PE=1 SV=3 - [K1C15_HUMAN]	11.62	4	0	6	162	2.85284e+08	6.9814e+07	4.13738e+08	124.154	11.62	12	61	130.545	9.65	10	66	55.1005	11.62	12	35	456	49.1811	4.76709
Q02413	Desmoglein-1 OS=Homo sapiens GN=DSG1 PE=1 SV=2 - [DSG1_HUMAN]	11.53	1	8	8	48	2.29944e+07	6.70806e+06	4.39148e+07	66.2489	11.53	16	29	2.7601	1.53	2	2	28.022	8.39	12	17	1049	113.676	5.03369
P02735	Serum amyloid A protein OS=Homo sapiens GN=SAA1 PE=1 SV=2 - [SAA_HUMAN]	11.48	1	1	1	8	1.13627e+06	1.82002e+06	1.86007e+06	7.37621	11.48	2	4	6.62699	11.48	2	2	5.88237	11.48	2	2	122	13.5235	6.78564
P02746	Complement C1q subcomponent subunit B OS=Homo sapiens GN=C1QB PE=1 SV=3 - [C1QB_HUMAN]	11.46	1	2	2	18	2.69803e+07	1.9881e+07	6.5529e+07	20.0967	11.46	4	6	11.9288	11.46	4	4	22.6066	11.46	3	8	253	26.7045	8.63135
P12035	Keratin, type II cytoskeletal 3 OS=Homo sapiens GN=KRT3 PE=1 SV=3 - [K2C3_HUMAN]	11.46	2	0	7	62	6.38967e+07	2.31273e+07	1.05978e+08	42.9408	10.03	11	21	53.1717	4.3	6	30	17.7866	7.01	5	11	628	64.3776	6.48096
O95678	Keratin, type II cytoskeletal 75 OS=Homo sapiens GN=KRT75 PE=1 SV=2 - [K2C75_HUMAN]	11.43	4	0	6	101	1.43292e+08	5.38092e+07	7.37057e+07	94.9566	11.43	12	38	145.722	5.26	6	52	26.3483	6.72	5	11	551	59.524	7.73779
P09172	Dopamine beta-hydroxylase OS=Homo sapiens GN=DBH PE=1 SV=3 - [DOPO_HUMAN]	11.35	1	3	3	6	0	1.94983e+07	4.75969e+06					15.3772	6.32	4	5	4.90523	5.02	1	1	617	69.0207	6.41748
P04406	Glyceraldehyde-3-phosphate dehydrogenase OS=Homo sapiens GN=GAPDH PE=1 SV=3 - [G3P_HUMAN]	11.34	1	1	1	3	0	41312.1	0					11.4522	11.34	1	3					335	36.0304	8.45557
P23142	Fibulin-1 OS=Homo sapiens GN=FBLN1 PE=1 SV=4 - [FBLN1_HUMAN]	11.24	4	6	6	27	4.95002e+06	1.11146e+07	2.38554e+07	4.51914	1.56	2	2	36.2185	11.24	11	19	15.6237	7.11	5	6	703	77.1624	5.22412
Q562R1	Beta-actin-like protein 2 OS=Homo sapiens GN=ACTBL2 PE=1 SV=2 - [ACTBL_HUMAN]	11.17	1	1	3	25	1.30983e+07	1.30225e+07	3.9023e+07	11.301	6.38	4	8	1.60011	6.38	3	5	6.97139	11.17	5	12	376	41.976	5.59229
P30041	Peroxiredoxin-6 OS=Homo sapiens GN=PRDX6 PE=1 SV=3 - [PRDX6_HUMAN]	11.16	1	2	2	4	594494	0	3.61555e+06	3.56408	5.8	2	2					4.67533	5.36	2	2	224	25.0192	6.37939
Q12805-2	Isoform 2 of EGF-containing fibulin-like extracellular matrix protein 1 OS=Homo sapiens GN=EFEMP1 - [FBLN3_HUMAN]	11.13	4	3	3	15	4.14823e+06	7.45807e+06	1.73123e+07	22.2648	11.13	6	6	14.3998	8.25	4	4	13.2621	5.15	4	5	485	53.6867	5.021
P02741-2	Isoform 2 of C-reactive protein OS=Homo sapiens GN=CRP - [CRP_HUMAN]	10.99	2	1	1	21	1.8828e+07	9.87672e+06	5.38333e+07	9.20738	10.99	2	4	20.8895	10.99	2	14	6.75291	10.99	2	3	91	10.4084	9.17334
P51571	Translocon-associated protein subunit delta OS=Homo sapiens GN=SSR4 PE=1 SV=1 - [SSRD_HUMAN]	10.98	1	1	1	1	319825	0	0	2.21721	10.98	1	1									173	18.9866	6.15088
P07339	Cathepsin D OS=Homo sapiens GN=CTSD PE=1 SV=1 - [CATD_HUMAN]	10.92	1	3	3	13	6.18644e+06	2.34461e+06	2.17209e+07	17.4285	10.92	5	8	3.408	4.37	2	2	1.63123	2.18	2	3	412	44.5236	6.53662
P31151	Protein S100-A7 OS=Homo sapiens GN=S100A7 PE=1 SV=4 - [S10A7_HUMAN]	10.89	1	1	1	2	0	4.50506e+06	0					5.39858	10.89	2	2					101	11.4636	6.771
Q9H596	Dual specificity protein phosphatase 21 OS=Homo sapiens GN=DUSP21 PE=1 SV=1 - [DUS21_HUMAN]	10.53	1	1	1	1	0	1.02082e+06	0					2.52728	10.53	1	1					190	21.5149	8.82178
Q9Y3U8	60S ribosomal protein L36 OS=Homo sapiens GN=RPL36 PE=1 SV=3 - [RL36_HUMAN]	10.48	1	1	1	2	0	0	0									2.41038	10.48	2	2	105	12.2459	11.5903
O14718	Visual pigment-like receptor peropsin OS=Homo sapiens GN=RRH PE=1 SV=1 - [OPSX_HUMAN]	10.39	1	1	1	2	0	0	0	5.7723	10.39	1	2									337	37.3979	8.48486
Q8N8X6	Golgin subfamily A member 2-like protein 4 OS=Homo sapiens PE=2 SV=1 - [GG2L4_HUMAN]	10.37	2	1	1	1	0	2.41363e+07	0					0	10.37	1	1					164	19.7829	8.83643
Q9UK55	Protein Z-dependent protease inhibitor OS=Homo sapiens GN=SERPINA10 PE=1 SV=1 - [ZPI_HUMAN]	10.36	1	4	4	38	8.78923e+06	5.73237e+06	2.41504e+07	32.6131	10.36	8	14	33.9599	7.66	6	11	27.6861	10.36	7	13	444	50.6742	8.26514
P07355	Annexin A2 OS=Homo sapiens GN=ANXA2 PE=1 SV=2 - [ANXA2_HUMAN]	10.32	3	3	3	22	3.87702e+06	2.14171e+06	6.36994e+06	28.8277	10.32	6	12	5.94307	2.95	2	2	19.0309	6.19	4	8	339	38.5798	7.75244
Q9HA72	Calcium homeostasis modulator protein 2 OS=Homo sapiens GN=CALHM2 PE=2 SV=1 - [CAHM2_HUMAN]	10.22	1	1	2	2	1.13247e+06	0	4.9679e+06	2.8615	5.57	1	1					0	4.64	1	1	323	36.1516	7.69385
P31947-2	Isoform 2 of 14-3-3 protein sigma OS=Homo sapiens GN=SFN - [1433S_HUMAN]	10.19	2	2	2	4	1.35988e+06	0	0	6.64654	10.19	4	4									216	24.321	4.81787
P01604	Ig kappa chain V-I region Kue OS=Homo sapiens PE=1 SV=1 - [KV112_HUMAN]	10.19	1	1	1	8	0	3.21992e+06	0					18.0823	10.19	2	8					108	12.119	8.80713
P01033	Metalloproteinase inhibitor 1 OS=Homo sapiens GN=TIMP1 PE=1 SV=1 - [TIMP1_HUMAN]	10.14	1	2	2	16	8.15047e+06	9.32891e+06	6.99414e+07	11.6155	10.14	4	4	18.0674	10.14	4	6	14.2237	10.14	4	6	207	23.1555	8.104
P15924	Desmoplakin OS=Homo sapiens GN=DSP PE=1 SV=3 - [DESP_HUMAN]	10.03	2	22	23	72	1.06593e+07	2.31522e+06	1.55473e+07	128.514	9.72	43	53	10.6836	1.92	8	8	18.0534	2.06	11	11	2871	331.569	6.81494
Q0D2H9	Putative golgin subfamily A member 8D OS=Homo sapiens GN=GOLGA8DP PE=5 SV=1 - [GOG8D_HUMAN]	10	2	1	1	1	1.96552e+06	0	0	0	10	1	1									430	48.3931	5.56689
P02730	Band 3 anion transport protein OS=Homo sapiens GN=SLC4A1 PE=1 SV=3 - [B3AT_HUMAN]	9.88	1	5	5	31	3.95826e+06	0	0	99.5528	9.88	9	31									911	101.727	5.18604
Q9BTP7	Fanconi anemia-associated protein of 24 kDa OS=Homo sapiens GN=FAAP24 PE=1 SV=2 - [FAP24_HUMAN]	9.77	1	1	1	6	3.8292e+08	7.55326e+07	2.12484e+07	4.53949	9.77	1	2	7.22753	9.77	1	3	2.0524	9.77	1	1	215	23.8818	9.18799
P02144	Myoglobin OS=Homo sapiens GN=MB PE=1 SV=2 - [MYG_HUMAN]	9.74	1	1	1	1	0	0	5.26591e+06									0	9.74	1	1	154	17.173	7.6792
Q6KB66-2	Isoform 2 of Keratin, type II cytoskeletal 80 OS=Homo sapiens GN=KRT80 - [K2C80_HUMAN]	9.72	6	3	4	14	7.37291e+06	3.44307e+07	8.52868e+07	23.5797	9.72	8	9	6.62641	2.61	2	2	7.81989	4.74	3	3	422	47.212	5.30029
P62805	Histone H4 OS=Homo sapiens GN=HIST1H4A PE=1 SV=2 - [H4_HUMAN]	9.71	1	1	1	12	5.25893e+06	9.36948e+07	0	26.7996	9.71	2	10	6.66582	9.71	2	2					103	11.3604	11.356
O75874	Isocitrate dehydrogenase [NADP] cytoplasmic OS=Homo sapiens GN=IDH1 PE=1 SV=2 - [IDHC_HUMAN]	9.66	1	2	3	10	0	2.86777e+06	3.56828e+06					6.93362	9.66	5	6	6.99439	5.8	4	4	414	46.6295	7.00537
Q32M88-2	Isoform 2 of Acid trehalase-like protein 1 OS=Homo sapiens GN=ATHL1 - [ATHL1_HUMAN]	9.6	2	1	1	2	0	0	0					3.18558	9.6	1	2					354	38.2491	6.21436
P68104	Elongation factor 1-alpha 1 OS=Homo sapiens GN=EEF1A1 PE=1 SV=1 - [EF1A1_HUMAN]	9.52	3	2	2	13	0	830496	1.26025e+06					42.7566	6.28	1	11	6.81921	3.25	2	2	462	50.1091	9.01221
P01019	Angiotensinogen OS=Homo sapiens GN=AGT PE=1 SV=1 - [ANGT_HUMAN]	9.28	1	4	4	312	3.24019e+07	2.0997e+08	1.84694e+08	118.027	9.28	8	48	420.834	9.28	8	193	139.205	9.28	8	71	485	53.1205	6.31592
P10635	Cytochrome P450 2D6 OS=Homo sapiens GN=CYP2D6 PE=1 SV=2 - [CP2D6_HUMAN]	9.26	1	1	1	1	0	1.07285e+06	0					0	9.26	1	1					497	55.7341	7.25439
P01773	Ig heavy chain V-III region BUR OS=Homo sapiens PE=1 SV=1 - [HV312_HUMAN]	9.24	1	1	1	60	1.20695e+08	8.98268e+07	233650248	11.921	9.24	2	12	55.7334	9.24	2	33	19.3896	9.24	2	15	119	12.9726	9.59814
P62269	40S ribosomal protein S18 OS=Homo sapiens GN=RPS18 PE=1 SV=3 - [RS18_HUMAN]	9.21	1	1	1	22	9.07932e+07	9.86435e+06	380466	19.9889	9.21	1	8	21.967	9.21	1	12	4.62136	9.21	1	2	152	17.7079	10.9897
P61006	Ras-related protein Rab-8A OS=Homo sapiens GN=RAB8A PE=1 SV=1 - [RAB8A_HUMAN]	9.18	1	1	1	1	0	0	0					0	9.18	1	1					207	23.6532	9.0708
Q92753-1	Isoform 1 of Nuclear receptor ROR-beta OS=Homo sapiens GN=RORB - [RORB_HUMAN]	9.15	2	0	1	8	0	0	0	0	9.15	1	8									459	52.0391	7.79639
P01880	Ig delta chain C region OS=Homo sapiens GN=IGHD PE=1 SV=2 - [IGHD_HUMAN]	9.11	2	2	2	44	9.0798e+07	6.67582e+07	3.9181e+08	23.9538	3.39	2	8	97.766	9.11	4	26	27.7066	3.39	2	10	384	42.2272	7.92822
P01771	Ig heavy chain V-III region HIL OS=Homo sapiens PE=1 SV=1 - [HV310_HUMAN]	9.09	1	1	1	111	6.33273e+07	4.29816e+08	3.65965e+08	41.7634	9.09	2	29	67.3634	9.09	2	51	35.2958	9.09	2	31	121	13.5572	9.36377
P09038-2	Isoform 3 of Heparin-binding growth factor 2 OS=Homo sapiens GN=FGF2 - [FGF2_HUMAN]	9.03	4	1	1	3	0	2.73078e+07	0					9.00636	9.03	1	3					155	17.2428	9.5249
P01769	Ig heavy chain V-III region GA OS=Homo sapiens PE=1 SV=1 - [HV308_HUMAN]	9.02	1	1	1	2	19826965	0	0	0	9.02	1	1	1.60995	9.02	1	1					122	13.1574	9.77393
Q5XKE5	Keratin, type II cytoskeletal 79 OS=Homo sapiens GN=KRT79 PE=1 SV=2 - [K2C79_HUMAN]	8.97	2	0	5	117	1.28282e+08	5.85585e+07	2.13019e+08	87.1703	8.97	10	37	169.695	5.23	6	68	27.6025	3.93	4	12	535	57.8002	7.1958
P41222	Prostaglandin-H2 D-isomerase OS=Homo sapiens GN=PTGDS PE=1 SV=1 - [PTGDS_HUMAN]	8.95	1	1	1	6	6.58884e+06	7.30291e+06	3.1095e+07	5.83778	8.95	2	2	3.94911	8.95	2	2	5.96052	8.95	2	2	190	21.0153	7.79639
P02655	Apolipoprotein C-II OS=Homo sapiens GN=APOC2 PE=1 SV=1 - [APOC2_HUMAN]	8.91	1	1	1	4	5.12738e+06	0	2.8556e+07	4.46826	8.91	2	2					1.89353	8.91	2	2	101	11.2768	4.71631
O14727-6	Isoform 6 of Apoptotic protease-activating factor 1 OS=Homo sapiens GN=APAF1 - [APAF_HUMAN]	8.88	4	1	1	1	0	0	0									0	8.88	1	1	338	37.9518	8.25049
P48740	Mannan-binding lectin serine protease 1 OS=Homo sapiens GN=MASP1 PE=1 SV=3 - [MASP1_HUMAN]	8.87	4	5	5	46	5.16271e+06	6.27119e+06	3.93844e+07	52.4527	8.3	8	18	11.6855	3.29	4	4	50.6283	8.87	10	24	699	79.1952	5.49072
P05546	Heparin cofactor 2 OS=Homo sapiens GN=SERPIND1 PE=1 SV=3 - [HEP2_HUMAN]	8.82	1	4	4	35	1.71873e+07	1.49456e+07	1.12673e+08	19.4461	3.41	4	15	19.1348	3.41	4	12	10.0531	5.21	4	8	499	57.0342	6.90283
Q8NBP7	Proprotein convertase subtilisin/kexin type 9 OS=Homo sapiens GN=PCSK9 PE=1 SV=3 - [PCSK9_HUMAN]	8.82	2	4	4	10	775206	7.85589e+06	4.85422e+06	1.68366	1.45	1	1	10.4302	3.61	3	4	15.8074	5.2	3	5	692	74.2391	6.60986
P46781	40S ribosomal protein S9 OS=Homo sapiens GN=RPS9 PE=1 SV=3 - [RS9_HUMAN]	8.76	1	1	2	5	1.66837e+07	1.87857e+06	1.45428e+08	0	4.12	1	1	0	4.64	1	2	0	4.12	1	2	194	22.5776	10.6528
Q53HC0	Coiled-coil domain-containing protein 92 OS=Homo sapiens GN=CCDC92 PE=2 SV=2 - [CCD92_HUMAN]	8.76	1	0	1	3	0	0	0					2.9985	8.76	1	3					331	36.9383	8.89502
P34931	Heat shock 70 kDa protein 1-like OS=Homo sapiens GN=HSPA1L PE=1 SV=2 - [HS71L_HUMAN]	8.74	4	1	4	12	3.36755e+06	0	1.52483e+07	14.031	6.24	6	6					15.1029	6.24	6	6	641	70.3313	6.02393
Q9GZZ8	Extracellular glycoprotein lacritin OS=Homo sapiens GN=LACRT PE=1 SV=1 - [LACRT_HUMAN]	8.7	1	1	1	2	2.62644e+06	0	0	6.80909	8.7	2	2									138	14.2373	5.50342
Q969H8	UPF0556 protein C19orf10 OS=Homo sapiens GN=C19orf10 PE=1 SV=1 - [CS010_HUMAN]	8.67	1	1	1	1	0	0	4.44857e+06									0	8.67	1	1	173	18.7833	6.68311
P08519	Apolipoprotein(a) OS=Homo sapiens GN=LPA PE=1 SV=1 - [APOA_HUMAN]	8.6	1	2	2	11	756940	1.37722e+07	6.09732e+06	5.97501	0.31	2	2	25.6931	8.29	2	8	2.63399	8.29	1	1	4548	500.995	5.88428
P35542	Serum amyloid A-4 protein OS=Homo sapiens GN=SAA4 PE=1 SV=2 - [SAA4_HUMAN]	8.46	1	1	1	193	2.83909e+08	3.89949e+08	1862992484	81.5149	8.46	2	39	190.154	8.46	2	106	80.0023	8.46	2	48	130	14.7373	9.0708
P13796	Plastin-2 OS=Homo sapiens GN=LCP1 PE=1 SV=6 - [PLSL_HUMAN]	8.45	3	4	4	15	3.25751e+06	0	1.37814e+07	14.9524	4.31	6	8					15.4855	7.18	5	7	627	70.2439	5.42725
P13591-5	Isoform 5 of Neural cell adhesion molecule 1 OS=Homo sapiens GN=NCAM1 - [NCAM1_HUMAN]	8.42	5	2	3	13	3.25128e+06	2.85608e+06	9.69264e+07	9.24623	5.11	4	4	5.50909	1.8	2	2	12.9786	8.42	5	7	665	73.4275	4.83057
Q13748-2	Isoform 2 of Tubulin alpha-3C/D chain OS=Homo sapiens GN=TUBA3C - [TBA3C_HUMAN]	8.37	8	1	2	7	944361	9.62274e+06	0	8.9856	5.02	1	2	5.5441	3.35	1	5					418	46.0829	5.14795
P01762	Ig heavy chain V-III region TRO OS=Homo sapiens PE=1 SV=1 - [HV301_HUMAN]	8.2	1	1	1	1	0	0	0									1.9771	8.2	1	1	122	13.4635	9.71533
P25774	Cathepsin S OS=Homo sapiens GN=CTSS PE=1 SV=3 - [CATS_HUMAN]	8.16	1	2	2	16	3.28796e+06	3.27704e+06	1.79526e+07	12.0903	8.16	4	4	9.2007	3.32	2	4	14.4869	8.16	4	8	331	37.4713	8.33838
Q92954-3	Isoform C of Proteoglycan 4 OS=Homo sapiens GN=PRG4 - [PRG4_HUMAN]	8.16	6	6	6	24	6.88817e+06	1.38969e+07	3.38839e+07	11.3161	4.81	4	5	25.8869	8.16	11	14	13.743	5.26	4	5	1311	141.018	9.39307
P01699	Ig lambda chain V-I region VOR OS=Homo sapiens PE=1 SV=1 - [LV101_HUMAN]	8.11	1	1	1	13	0	3.60366e+07	6881253					14.8143	8.11	2	9	1.94114	8.11	2	4	111	11.5075	5.2876
P07477	Trypsin-1 OS=Homo sapiens GN=PRSS1 PE=1 SV=1 - [TRY1_HUMAN]	8.1	3	1	1	2	1.54139e+06	0	0	5.41501	8.1	2	2									247	26.5411	6.50732
P47929	Galectin-7 OS=Homo sapiens GN=LGALS7 PE=1 SV=2 - [LEG7_HUMAN]	8.09	1	1	1	8	9.40902e+06	0	7.86008e+06	12.532	8.09	2	4					8.70378	8.09	2	4	136	15.0658	7.62061
Q9UNS2	COP9 signalosome complex subunit 3 OS=Homo sapiens GN=COPS3 PE=1 SV=3 - [CSN3_HUMAN]	8.04	1	2	2	3	1.22424e+06	1.32322e+07	4.71055e+07	0	3.78	1	1	3.29056	4.26	1	1	3.19765	4.26	1	1	423	47.842	6.65381
Q9NZ38	Uncharacterized protein IDI2-AS1 OS=Homo sapiens GN=IDI2-AS1 PE=1 SV=1 - [IDAS1_HUMAN]	7.98	1	1	1	6	6.43781e+06	1.09116e+07	0	0	7.98	1	5	0	7.98	1	1					188	21.2981	10.1987
P04433	Ig kappa chain V-III region VG (Fragment) OS=Homo sapiens PE=1 SV=1 - [KV309_HUMAN]	7.83	1	1	1	44	9.27013e+07	6.51085e+08	1.71134e+08	28.1835	7.83	2	14	41.2373	7.83	2	18	21.4795	7.83	2	12	115	12.5673	4.95752
P05062	Fructose-bisphosphate aldolase B OS=Homo sapiens GN=ALDOB PE=1 SV=2 - [ALDOB_HUMAN]	7.69	1	2	2	8	2.04898e+06	3.65636e+06	8.68963e+06	6.50575	3.57	2	2	5.89676	3.57	2	2	9.33456	7.69	4	4	364	39.4481	7.86963
Q7RTY8-3	Isoform 3 of Transmembrane protease serine 7 OS=Homo sapiens GN=TMPRSS7 - [TMPS7_HUMAN]	7.69	3	1	2	2	0	701451	0	0	4.9	1	1	0	2.8	1	1					572	63.9833	7.89893
P18124	60S ribosomal protein L7 OS=Homo sapiens GN=RPL7 PE=1 SV=1 - [RL7_HUMAN]	7.66	1	1	1	1	1.8242e+06	0	0	0	7.66	1	1									248	29.2072	10.6528
Q9UHK6-4	Isoform 3 of Alpha-methylacyl-CoA racemase OS=Homo sapiens GN=AMACR - [AMACR_HUMAN]	7.58	2	1	1	1	0	0	39568026									2.38136	7.58	1	1	198	22.1696	10.1401
Q9H999	Pantothenate kinase 3 OS=Homo sapiens GN=PANK3 PE=1 SV=1 - [PANK3_HUMAN]	7.57	4	2	2	3	0	2.82451e+06	0					6.30523	7.57	2	3					370	41.0679	6.55127
Q92820	Gamma-glutamyl hydrolase OS=Homo sapiens GN=GGH PE=1 SV=2 - [GGH_HUMAN]	7.55	1	2	2	18	6.76473e+06	1.22668e+06	5.37605e+07	13.6251	7.55	4	6	4.70677	3.46	2	2	18.3284	7.55	4	10	318	35.9412	7.10791
Q99801-3	Isoform 3 of Homeobox protein Nkx-3.1 OS=Homo sapiens GN=NKX3-1 - [NKX31_HUMAN]	7.55	5	1	1	1	0	1.10956e+06	0					0	7.55	1	1					159	18.4115	9.51025
P01591	Immunoglobulin J chain OS=Homo sapiens GN=IGJ PE=1 SV=4 - [IGJ_HUMAN]	7.55	1	1	1	2	0	0	5.9352e+06									5.05943	7.55	2	2	159	18.087	5.23682
Q9H9A5-5	Isoform 5 of CCR4-NOT transcription complex subunit 10 OS=Homo sapiens GN=CNOT10 - [CNOTA_HUMAN]	7.54	5	1	1	1	0	0	0	2.81575	7.54	1	1									451	49.4512	8.1333
P12273	Prolactin-inducible protein OS=Homo sapiens GN=PIP PE=1 SV=1 - [PIP_HUMAN]	7.53	1	1	1	8	4.44335e+06	0	11724700	10.203	7.53	2	4					6.76487	7.53	2	4	146	16.5618	8.04541
Q9H1B5-2	Isoform 2 of Xylosyltransferase 2 OS=Homo sapiens GN=XYLT2 - [XYLT2_HUMAN]	7.52	1	1	1	1	0	0	0					0	7.52	1	1					638	71.07	9.12939
P05787	Keratin, type II cytoskeletal 8 OS=Homo sapiens GN=KRT8 PE=1 SV=7 - [K2C8_HUMAN]	7.45	5	0	4	38	2.34623e+07	1.94448e+07	1.1433e+08	27.3941	7.45	8	18	18.0848	5.59	6	12	6.20819	4.14	4	8	483	53.6711	5.59229
Q9NP55	BPI fold-containing family A member 1 OS=Homo sapiens GN=BPIFA1 PE=1 SV=1 - [BPIA1_HUMAN]	7.42	1	1	1	2	7.32619e+06	0	0	7.10347	7.42	2	2									256	26.6959	5.75732
P02747	Complement C1q subcomponent subunit C OS=Homo sapiens GN=C1QC PE=1 SV=3 - [C1QC_HUMAN]	7.35	1	1	1	40	7.80087e+07	1.02612e+08	475135201	38.479	7.35	2	10	73.9004	7.35	2	20	36.1882	7.35	2	10	245	25.7571	8.41162
P11597	Cholesteryl ester transfer protein OS=Homo sapiens GN=CETP PE=1 SV=2 - [CETP_HUMAN]	7.3	2	3	3	33	2.43656e+07	5.14492e+06	1.06745e+08	31.2615	7.3	6	14	23.989	5.07	4	8	19.815	7.3	6	11	493	54.7212	6.0874
P01701	Ig lambda chain V-I region NEW OS=Homo sapiens PE=1 SV=1 - [LV103_HUMAN]	7.21	1	1	1	13	3.28438e+06	3.0916e+06	9.89459e+06	5.44941	7.21	2	4	1.63705	7.21	2	2	5.55161	7.21	2	7	111	11.4457	8.00146
P01702	Ig lambda chain V-I region NIG-64 OS=Homo sapiens PE=1 SV=1 - [LV104_HUMAN]	7.21	2	1	1	23	6.7851e+06	4.49584e+07	1.14108e+07	5.43069	7.21	2	8	9.48526	7.21	2	9	3.29222	7.21	2	6	111	11.4465	4.89404
P01712	Ig lambda chain V-II region WIN OS=Homo sapiens PE=1 SV=1 - [LV209_HUMAN]	7.21	1	1	1	6	1.47042e+06	0	8.46916e+06	3.93864	7.21	2	2					6.81045	7.21	2	4	111	11.6867	8.44092
Q969T7	Cytosolic 5'-nucleotidase III-like protein OS=Homo sapiens GN=NT5C3L PE=1 SV=3 - [5NT3L_HUMAN]	7.19	1	0	2	2	916819	373771	0	0	4.45	1	1	1.65221	2.74	1	1					292	33.507	6.68311
Q96M96	FYVE, RhoGEF and PH domain-containing protein 4 OS=Homo sapiens GN=FGD4 PE=1 SV=2 - [FGD4_HUMAN]	7.18	2	2	3	5	0	0	4.42577e+06	0	3.39	1	1	0	1.44	1	2	1.99473	3.79	2	2	766	86.5714	6.12549
P55056	Apolipoprotein C-IV OS=Homo sapiens GN=APOC4 PE=1 SV=1 - [APOC4_HUMAN]	7.09	1	1	1	6	2.31499e+06	0	5.49277e+06	4.29689	7.09	2	2					0	7.09	2	4	127	14.5435	8.92432
O94905	Erlin-2 OS=Homo sapiens GN=ERLIN2 PE=1 SV=1 - [ERLN2_HUMAN]	7.08	3	1	2	11	3.42073e+06	1.13489e+06	0	10.9164	7.08	3	5	15.7332	5.01	1	6					339	37.8155	5.61768
O00602	Ficolin-1 OS=Homo sapiens GN=FCN1 PE=1 SV=2 - [FCN1_HUMAN]	7.06	1	2	2	12	6.39455e+06	7.96463e+06	0	5.16255	4.29	2	2	18.2755	7.06	4	8	5.087	2.76	2	2	326	35.0561	6.85889
Q08830	Fibrinogen-like protein 1 OS=Homo sapiens GN=FGL1 PE=1 SV=3 - [FGL1_HUMAN]	7.05	1	2	2	5	3.80624e+06	2.87466e+06	3.26597e+06	4.23377	2.56	2	2	0	2.56	1	1	5.61784	4.49	2	2	312	36.3565	5.87158
P02775	Platelet basic protein OS=Homo sapiens GN=PPBP PE=1 SV=3 - [CXCL7_HUMAN]	7.03	1	1	1	4	0	2.81861e+06	0					6.92893	7.03	2	4					128	13.8854	8.79248
P01824	Ig heavy chain V-II region WAH OS=Homo sapiens PE=1 SV=1 - [HV206_HUMAN]	6.98	1	1	1	14	1.17663e+06	7.08703e+06	1.85075e+06	11.6261	6.98	2	6	13.8265	6.98	2	6	1.6644	6.98	2	2	129	14.108	8.45557
Q7Z5H5	Vomeronasal type-1 receptor 4 OS=Homo sapiens GN=VN1R4 PE=2 SV=2 - [VN1R4_HUMAN]	6.98	1	1	1	1	6.50332e+06	0	0	0	6.98	1	1									301	33.5344	9.42236
P16930	Fumarylacetoacetase OS=Homo sapiens GN=FAH PE=1 SV=2 - [FAAA_HUMAN]	6.92	1	1	2	8	562019	0	4.43242e+06	8.2811	6.92	3	4	7.13763	3.82	2	2	7.35514	3.82	2	2	419	46.3442	6.94678
Q15011-3	Isoform 3 of Homocysteine-responsive endoplasmic reticulum-resident ubiquitin-like domain member 1 protein OS=Homo sapiens GN=HERPUD1 - [HERP1_HUMAN]	6.9	3	1	1	1	0	0	1.34912e+06									0	6.9	1	1	232	26.2041	5.77002
Q9Y6Z7	Collectin-10 OS=Homo sapiens GN=COLEC10 PE=2 SV=2 - [COL10_HUMAN]	6.86	1	2	2	13	4.99786e+06	2.12286e+06	2.69688e+07	6.87077	6.86	4	4	3.79012	3.25	2	2	10.4357	6.86	4	7	277	30.6853	7.32764
P35240-10	Isoform 10 of Merlin OS=Homo sapiens GN=NF2 - [MERL_HUMAN]	6.82	8	1	1	4	4.45003e+07	5.15393e+06	1.76795e+08	0	6.82	2	2	0	6.82	1	1	0	6.82	1	1	220	24.4997	9.51025
Q2TV78-2	Isoform 2 of Putative macrophage-stimulating protein MSTP9 OS=Homo sapiens GN=MST1P9 - [MSTP9_HUMAN]	6.82	3	4	4	19	2.73142e+06	6.86227e+06	1.18691e+07	5.07554	3.77	2	2	28.1105	6.82	7	11	4.08548	5.08	5	6	689	76.7339	7.78174
P05177	Cytochrome P450 1A2 OS=Homo sapiens GN=CYP1A2 PE=1 SV=3 - [CP1A2_HUMAN]	6.8	2	0	1	4	0	144039	0					2.41158	6.8	1	4					515	58.2573	9.05615
Q8NH51	Olfactory receptor 8K3 OS=Homo sapiens GN=OR8K3 PE=2 SV=1 - [OR8K3_HUMAN]	6.73	1	1	1	5	2.39588e+06	3.84286e+06	0	7.90607	6.73	1	3	5.1668	6.73	1	2					312	35.4388	7.85498
O75636	Ficolin-3 OS=Homo sapiens GN=FCN3 PE=1 SV=2 - [FCN3_HUMAN]	6.69	2	2	2	10	1.42956e+06	1.46876e+07	1.60424e+07	4.55565	3.01	2	2	5.02615	3.01	2	2	12.5112	6.69	4	6	299	32.882	6.66846
P04196	Histidine-rich glycoprotein OS=Homo sapiens GN=HRG PE=1 SV=1 - [HRG_HUMAN]	6.67	1	3	3	183	7.89446e+07	4.88255e+07	4.12719e+08	57.6254	6.67	6	24	323.927	6.67	6	132	61.288	6.67	6	27	525	59.5409	7.50342
Q7Z3Z0	Keratin, type I cytoskeletal 25 OS=Homo sapiens GN=KRT25 PE=1 SV=1 - [K1C25_HUMAN]	6.67	3	1	3	17	7.55223e+06	1.10192e+07	7.78368e+06	13.0985	4.67	3	7	12.6489	4	4	6	7.87724	2	2	4	450	49.2874	5.08447
Q14CN4-2	Isoform 2 of Keratin, type II cytoskeletal 72 OS=Homo sapiens GN=KRT72 - [K2C72_HUMAN]	6.67	3	0	3	30	8.48402e+06	6.53715e+06	1.12914e+07	30.2412	6.67	6	16	11.248	3.73	4	8	5.86294	5.29	4	6	510	55.7144	6.88818
Q494R4	Coiled-coil domain-containing protein 153 OS=Homo sapiens GN=CCDC153 PE=2 SV=2 - [CC153_HUMAN]	6.67	1	1	1	17	1.1116e+07	4.80647e+07	0	0	6.67	1	8	1.70934	6.67	2	9					210	23.8435	9.29053
Q9P121-3	Isoform 3 of Neurotrimin OS=Homo sapiens GN=NTM - [NTRI_HUMAN]	6.65	4	1	1	1	0	0	4.47812e+06									2.05571	6.65	1	1	316	34.9628	6.96143
Q13103	Secreted phosphoprotein 24 OS=Homo sapiens GN=SPP2 PE=1 SV=1 - [SPP24_HUMAN]	6.64	1	1	1	2	0	0	3.77002e+06									6.16291	6.64	2	2	211	24.3218	8.32373
A2A2Y4-3	Isoform 3 of FERM domain-containing protein 3 OS=Homo sapiens GN=FRMD3 - [FRMD3_HUMAN]	6.63	4	1	2	2	0	2.62023e+06	0	2.15641	3.87	1	1	1.72979	2.76	1	1					362	40.659	5.51611
Q96IY4	Carboxypeptidase B2 OS=Homo sapiens GN=CPB2 PE=1 SV=2 - [CBPB2_HUMAN]	6.62	2	2	2	14	6.02991e+06	9.6239e+06	1.83866e+07	9.39767	6.62	4	4	15.4065	6.62	4	6	11.8858	6.62	3	4	423	48.3934	7.7085
P02765	Alpha-2-HS-glycoprotein OS=Homo sapiens GN=AHSG PE=1 SV=1 - [FETUA_HUMAN]	6.54	1	2	2	40	1.1134e+07	2.19793e+07	5.7845e+07	44.9248	6.54	4	21	45.0229	6.54	4	16	9.23456	3.81	2	3	367	39.2997	5.71924
Q14515	SPARC-like protein 1 OS=Homo sapiens GN=SPARCL1 PE=1 SV=2 - [SPRL1_HUMAN]	6.48	1	2	2	3	0	0	7.40902e+06									11.6235	6.48	3	3	664	75.1613	4.80518
P43251	Biotinidase OS=Homo sapiens GN=BTD PE=1 SV=2 - [BTD_HUMAN]	6.45	1	3	3	24	3.60106e+06	3.63861e+06	4.7434e+07	19.9999	6.45	5	9	7.8832	4.05	3	5	14.7315	6.45	5	10	543	61.0933	6.25244
P19105	Myosin regulatory light chain 12A OS=Homo sapiens GN=MYL12A PE=1 SV=2 - [ML12A_HUMAN]	6.43	3	1	1	2	392937	0	0	5.44935	6.43	2	2									171	19.7815	4.80518
O00391	Sulfhydryl oxidase 1 OS=Homo sapiens GN=QSOX1 PE=1 SV=3 - [QSOX1_HUMAN]	6.43	2	3	3	27	6.33223e+06	7.84659e+06	2.92567e+07	29.2662	4.28	4	10	18.4088	6.43	5	7	28.4637	4.28	4	10	747	82.5255	8.92432
Q12913	Receptor-type tyrosine-protein phosphatase eta OS=Homo sapiens GN=PTPRJ PE=1 SV=3 - [PTPRJ_HUMAN]	6.36	1	4	5	16	2.65297e+06	0	2.27533e+07	19.8119	5.46	7	7					27.2055	5.53	7	9	1337	145.851	5.57959
O75494-4	Isoform 4 of Serine/arginine-rich splicing factor 10 OS=Homo sapiens GN=SRSF10 - [SRS10_HUMAN]	6.36	4	1	1	1	253333	0	0	0	6.36	1	1									173	20.9875	10.4771
Q86WK7	Amphoterin-induced protein 3 OS=Homo sapiens GN=AMIGO3 PE=2 SV=1 - [AMGO3_HUMAN]	6.35	1	1	2	2	4.26175e+06	0	524506	2.20455	3.97	1	1					0	2.38	1	1	504	55.2145	7.86963
P49908	Selenoprotein P OS=Homo sapiens GN=SEPP1 PE=1 SV=3 - [SEPP1_HUMAN]	6.3	1	2	2	32	4.76654e+07	1.43442e+07	1.59204e+08	15.05	2.62	2	6	42.512	2.62	2	16	19.8221	6.3	4	10	381	43.1563	7.86963
P31025	Lipocalin-1 OS=Homo sapiens GN=LCN1 PE=1 SV=1 - [LCN1_HUMAN]	6.25	1	1	1	4	6.61619e+06	0	9.74246e+06	5.26339	6.25	2	2					5.46395	6.25	2	2	176	19.2378	5.57959
Q8N4L2	Transmembrane protein 55A OS=Homo sapiens GN=TMEM55A PE=2 SV=1 - [TM55A_HUMAN]	6.23	1	1	1	4	5.09459e+06	0	2.41963e+07	0	6.23	1	2					0	6.23	1	2	257	28.0623	8.67529
Q99784-3	Isoform 3 of Noelin OS=Homo sapiens GN=OLFM1 - [NOE1_HUMAN]	6.21	2	1	2	3	0	0	1.26748e+07					0	2.14	1	2	3.28569	4.07	1	1	467	54.0829	7.15186
P53985	Monocarboxylate transporter 1 OS=Homo sapiens GN=SLC16A1 PE=1 SV=3 - [MOT1_HUMAN]	6.2	1	1	1	1	0	0	0	0	6.2	1	1									500	53.9089	8.66064
Q15848	Adiponectin OS=Homo sapiens GN=ADIPOQ PE=1 SV=1 - [ADIPO_HUMAN]	6.15	1	1	1	12	1.24224e+07	1.339e+07	0	5.45562	6.15	2	2	30.2125	6.15	2	10					244	26.397	5.74463
Q15063-4	Isoform 4 of Periostin OS=Homo sapiens GN=POSTN - [POSTN_HUMAN]	6.13	4	3	3	10	679906	4.41527e+06	4.26534e+06	4.27543	2.66	1	1	23.3905	4.53	4	7	4.27554	4.26	2	2	751	83.7971	8.17725
Q5JPI3-2	Isoform 2 of Uncharacterized protein C3orf38 OS=Homo sapiens GN=C3orf38 - [CC038_HUMAN]	6.12	2	1	2	10	0	1.83504e+08	4.88798e+06					8.41291	6.12	2	8	0	6.12	2	2	327	37.2569	6.58057
Q96HP4	Oxidoreductase NAD-binding domain-containing protein 1 OS=Homo sapiens GN=OXNAD1 PE=1 SV=1 - [OXND1_HUMAN]	6.09	1	1	1	4	2.30082e+06	0	0	11.2887	6.09	1	4									312	34.8322	8.36768
P49747	Cartilage oligomeric matrix protein OS=Homo sapiens GN=COMP PE=1 SV=2 - [COMP_HUMAN]	6.08	1	2	2	8	2.58187e+06	3.58762e+06	1.36459e+07	7.84595	6.08	3	3	0	2.64	2	2	4.76596	6.08	3	3	757	82.8076	4.60205
Q8TDS4	Hydroxycarboxylic acid receptor 2 OS=Homo sapiens GN=HCAR2 PE=1 SV=1 - [HCAR2_HUMAN]	6.06	1	1	1	1	0	2.45166e+07	0					0	6.06	1	1					363	41.8217	9.11475
O14786-2	Isoform 2 of Neuropilin-1 OS=Homo sapiens GN=NRP1 - [NRP1_HUMAN]	6.06	2	1	2	3	0	2.16591e+06	4.5925e+06					2.74027	3.88	1	1	4.58656	2.17	2	2	644	71.8893	5.56689
P14618	Pyruvate kinase isozymes M1/M2 OS=Homo sapiens GN=PKM2 PE=1 SV=4 - [KPYM_HUMAN]	6.03	4	3	3	8	277149	2.5681e+06	4.51679e+06	2.28692	1.88	2	2	6.00791	2.07	2	2	9.27548	4.14	4	4	531	57.9	7.84033
Q8TB73	Protein NDNF OS=Homo sapiens GN=NDNF PE=2 SV=2 - [NDNF_HUMAN]	5.99	1	1	1	1	0	0	0	0	5.99	1	1									568	64.6323	8.93896
Q9P0G3	Kallikrein-14 OS=Homo sapiens GN=KLK14 PE=1 SV=2 - [KLK14_HUMAN]	5.99	1	1	1	2	0	0	0	0	5.99	1	1	0	5.99	1	1					267	29.1028	9.23193
Q96NI6	Leucine-rich repeat and fibronectin type-III domain-containing protein 5 OS=Homo sapiens GN=LRFN5 PE=1 SV=2 - [LRFN5_HUMAN]	5.98	1	1	2	2	0	0	1.67263e+07	0	3.62	1	1					2.16034	2.36	1	1	719	79.3946	7.48877
P0CG39	POTE ankyrin domain family member J OS=Homo sapiens GN=POTEJ PE=3 SV=1 - [POTEJ_HUMAN]	5.97	2	1	4	44	2.08249e+07	3.70137e+06	7.68357e+07	32.0712	3.76	5	15	32.8958	3.76	5	17	19.0028	4.43	5	12	1038	117.315	5.97314
Q9Y5Y7	Lymphatic vessel endothelial hyaluronic acid receptor 1 OS=Homo sapiens GN=LYVE1 PE=1 SV=2 - [LYVE1_HUMAN]	5.9	1	2	2	13	471282	5.8931e+06	42227130	3.85024	3.42	2	2	12.7799	2.48	1	9	5.07684	3.42	2	2	322	35.191	8.27979
P55058-2	Isoform 2 of Phospholipid transfer protein OS=Homo sapiens GN=PLTP - [PLTP_HUMAN]	5.9	2	2	2	17	1.02747e+07	4.01975e+06	1.84321e+07	4.09414	2.49	2	2	18.1564	5.9	4	9	12.5973	5.9	3	6	441	49.2409	6.55127
Q8N1A0-2	Isoform 2 of Keratin-like protein KRT222 OS=Homo sapiens GN=KRT222 - [KT222_HUMAN]	5.88	2	1	2	15	1.10449e+08	5.38321e+06	1.31767e+08	16.9724	3.53	2	6	11.3208	5.88	3	5	9.30045	3.53	2	4	255	29.3961	5.98584
Q7L5N7-2	Isoform 2 of Lysophosphatidylcholine acyltransferase 2 OS=Homo sapiens GN=LPCAT2 - [PCAT2_HUMAN]	5.84	2	1	1	1	641862	0	0	0	5.84	1	1									274	30.8755	4.81787
O95140	Mitofusin-2 OS=Homo sapiens GN=MFN2 PE=1 SV=3 - [MFN2_HUMAN]	5.81	2	1	3	6	9.66997e+06	526325	1.25629e+07	1.61126	3.7	2	4	1.75871	1.32	1	1	1.66376	2.11	1	1	757	86.3468	6.97607
Q01581	Hydroxymethylglutaryl-CoA synthase, cytoplasmic OS=Homo sapiens GN=HMGCS1 PE=1 SV=2 - [HMCS1_HUMAN]	5.77	1	1	2	7	1.17391e+08	6217917	4.4698e+06	0	5.77	2	3	0	3.27	1	3	0	2.5	1	1	520	57.2574	5.41455
P00742	Coagulation factor X OS=Homo sapiens GN=F10 PE=1 SV=2 - [FA10_HUMAN]	5.74	1	2	2	14	1.48149e+07	1.24664e+07	3.46651e+07	17.4897	5.74	4	6	5.23282	3.89	2	2	10.2616	5.74	4	6	488	54.6965	5.93506
P63104	14-3-3 protein zeta/delta OS=Homo sapiens GN=YWHAZ PE=1 SV=1 - [1433Z_HUMAN]	5.71	1	1	1	2	1.57496e+06	0	0	7.19884	5.71	2	2									245	27.7277	4.79248
Q9HCU9	Breast cancer metastasis-suppressor 1 OS=Homo sapiens GN=BRMS1 PE=1 SV=1 - [BRMS1_HUMAN]	5.69	1	1	1	4	4.46343e+06	1.61275e+07	1.5899e+07	0	5.69	1	2	0	5.69	1	1	0	5.69	1	1	246	28.443	4.7417
A6NJ16	Putative V-set and immunoglobulin domain-containing protein 6 OS=Homo sapiens GN=VSIG6 PE=5 SV=2 - [VSIG6_HUMAN]	5.69	1	1	1	7	1.21587e+06	5.36788e+06	0	0	5.69	1	4	5.37387	5.69	1	3					123	13.576	9.59814
Q16270	Insulin-like growth factor-binding protein 7 OS=Homo sapiens GN=IGFBP7 PE=1 SV=1 - [IBP7_HUMAN]	5.67	1	1	1	4	0	5.00321e+06	1.56891e+07					3.73106	5.67	2	2	4.73444	5.67	2	2	282	29.1114	7.89893
A5D8V6	Vacuolar protein sorting-associated protein 37C OS=Homo sapiens GN=VPS37C PE=1 SV=2 - [VP37C_HUMAN]	5.63	1	1	1	2	1.4577e+06	0	0	0	5.63	1	2									355	38.6346	5.21143
Q9UBR2	Cathepsin Z OS=Homo sapiens GN=CTSZ PE=1 SV=1 - [CATZ_HUMAN]	5.61	1	1	1	4	879352	0	2.27663e+06	4.47523	5.61	2	2					4.05914	5.61	2	2	303	33.8462	7.10791
Q96KS0-2	Isoform p40 of Egl nine homolog 2 OS=Homo sapiens GN=EGLN2 - [EGLN2_HUMAN]	5.61	2	1	2	4	0	5.4763e+06	1.1367e+07					0	5.61	2	3	0	2.14	1	1	374	40.1421	8.22119
P03951-2	Isoform 2 of Coagulation factor XI OS=Homo sapiens GN=F11 - [FA11_HUMAN]	5.6	2	3	3	30	1.16983e+07	2.11728e+07	5.4221e+07	21.8979	5.6	6	10	26.4265	5.6	6	10	25.9105	5.6	6	10	571	63.7987	8.26514
A0PK00	Transmembrane protein 120B OS=Homo sapiens GN=TMEM120B PE=2 SV=1 - [T120B_HUMAN]	5.6	1	1	1	1	0	6.3206e+06	0					0	5.6	1	1					339	40.2198	8.89502
Q9Y279-3	Isoform 3 of V-set and immunoglobulin domain-containing protein 4 OS=Homo sapiens GN=VSIG4 - [VSIG4_HUMAN]	5.57	2	1	1	1	0	1.84019e+06	0					0	5.57	1	1					305	33.8358	5.63037
Q8IV77	Cyclic nucleotide-gated cation channel alpha-4 OS=Homo sapiens GN=CNGA4 PE=1 SV=3 - [CNGA4_HUMAN]	5.57	1	1	2	2	0	0	1.25622e+07									0	5.57	2	2	575	65.9567	5.5542
Q9NVI1-4	Isoform 4 of Fanconi anemia group I protein OS=Homo sapiens GN=FANCI - [FANCI_HUMAN]	5.56	4	1	1	8	0	4.11126e+06	0					0	5.56	1	8					252	27.8067	5.52881
Q6MZP7-4	Isoform 4 of Protein lin-54 homolog OS=Homo sapiens GN=LIN54 - [LIN54_HUMAN]	5.46	4	0	1	1	2.62147e+06	0	0	3.35398	5.46	1	1									348	37.5886	8.57275
P29401	Transketolase OS=Homo sapiens GN=TKT PE=1 SV=3 - [TKT_HUMAN]	5.46	1	2	2	4	562741	0	0	12.0079	5.46	4	4									623	67.8347	7.66455
P17677	Neuromodulin OS=Homo sapiens GN=GAP43 PE=1 SV=1 - [NEUM_HUMAN]	5.46	1	1	1	1	0	0	0									2.32235	5.46	1	1	238	24.7879	4.71631
P31997	Carcinoembryonic antigen-related cell adhesion molecule 8 OS=Homo sapiens GN=CEACAM8 PE=1 SV=2 - [CEAM8_HUMAN]	5.44	1	1	1	13	0	3.09564e+07	0					9.32104	5.44	2	13					349	38.1301	7.38623
Q8N474	Secreted frizzled-related protein 1 OS=Homo sapiens GN=SFRP1 PE=1 SV=1 - [SFRP1_HUMAN]	5.41	1	1	1	2	0	2.48645e+06	5.97255e+06					0	5.41	1	1	0	5.41	1	1	314	35.3621	8.85107
P28066	Proteasome subunit alpha type-5 OS=Homo sapiens GN=PSMA5 PE=1 SV=3 - [PSA5_HUMAN]	5.39	1	1	1	2	780317	0	0	2.29634	5.39	2	2									241	26.3942	4.79248
P26038	Moesin OS=Homo sapiens GN=MSN PE=1 SV=3 - [MOES_HUMAN]	5.37	1	1	1	1	517982	0	0	6.0008	5.37	1	1									577	67.7778	6.40479
Q5TC79	Zinc finger and BTB domain-containing protein 37 OS=Homo sapiens GN=ZBTB37 PE=2 SV=1 - [ZBT37_HUMAN]	5.37	1	1	1	8	0	128571	0	7.09851	5.37	1	5	5.87972	5.37	1	3					503	56.0198	6.771
Q08554-2	Isoform 1B of Desmocollin-1 OS=Homo sapiens GN=DSC1 - [DSC1_HUMAN]	5.36	2	4	4	23	9.61948e+06	3.37969e+06	1.4489e+07	33.2823	5.36	8	12	8.18565	3.45	3	3	20.1058	3.45	4	8	840	93.776	5.52881
P22792	Carboxypeptidase N subunit 2 OS=Homo sapiens GN=CPN2 PE=1 SV=3 - [CPN2_HUMAN]	5.32	1	2	2	62	3.37347e+07	3.22579e+07	1.23141e+08	26.6676	5.32	4	17	71.4387	5.32	4	27	34.913	5.32	4	18	545	60.5181	5.98584
Q15070-3	Isoform 3 of Mitochondrial inner membrane protein OXA1L OS=Homo sapiens GN=OXA1L - [OXA1L_HUMAN]	5.32	1	1	1	1	0	8.65362e+06	0					0	5.32	1	1					263	28.7841	9.02686
P35030-3	Isoform C of Trypsin-3 OS=Homo sapiens GN=PRSS3 - [TRY3_HUMAN]	5.26	4	1	1	2	1.04112e+06	0	0	3.34771	5.26	2	2									247	26.7102	6.1001
P11226	Mannose-binding protein C OS=Homo sapiens GN=MBL2 PE=1 SV=2 - [MBL2_HUMAN]	5.24	1	1	1	2	0	1.05891e+06	0					6.6042	5.24	2	2					248	26.127	5.49072
P04180	Phosphatidylcholine-sterol acyltransferase OS=Homo sapiens GN=LCAT PE=1 SV=1 - [LCAT_HUMAN]	5.23	1	3	3	11	7.26152e+06	4.8625e+06	4.60718e+07	7.73986	5	4	4	5.84325	2.73	3	3	9.23733	5	4	4	440	49.5461	6.11279
Q9BT22	Chitobiosyldiphosphodolichol beta-mannosyltransferase OS=Homo sapiens GN=ALG1 PE=1 SV=2 - [ALG1_HUMAN]	5.17	1	1	1	3	7.85423e+06	0	0	7.65834	5.17	1	3									464	52.4839	7.2251
Q86SE8	Nucleoplasmin-2 OS=Homo sapiens GN=NPM2 PE=1 SV=1 - [NPM2_HUMAN]	5.14	1	1	1	3	0	4.13392e+06	0					0	5.14	1	3					214	24.1372	4.98291
Q8IWP9	Coiled-coil domain-containing protein 28A OS=Homo sapiens GN=CCDC28A PE=1 SV=1 - [CC28A_HUMAN]	5.11	1	1	1	1	1.09465e+06	0	0	2.76172	5.11	1	1									274	30.3477	9.24658
Q9UKW6-2	Isoform 2 of ETS-related transcription factor Elf-5 OS=Homo sapiens GN=ELF5 - [ELF5_HUMAN]	5.1	2	1	1	2	6.43726e+06	7.33061e+06	0	0	5.1	1	1	0	5.1	1	1					255	30.1013	5.80811
Q8N5Z5-2	Isoform 2 of BTB/POZ domain-containing protein KCTD17 OS=Homo sapiens GN=KCTD17 - [KCD17_HUMAN]	5.05	2	1	1	1	0	0	0	0	5.05	1	1									297	33.2553	4.89404
Q17RH7	Putative protein TPRXL OS=Homo sapiens GN=TPRXL PE=5 SV=2 - [TPRXL_HUMAN]	5.04	1	1	1	24	0	708132	0	7.80126	5.04	1	6	0	5.04	1	7	14.0719	5.04	1	11	258	24.1253	11.4731
O96020-2	Isoform Short of G1/S-specific cyclin-E2 OS=Homo sapiens GN=CCNE2 - [CCNE2_HUMAN]	5.01	2	1	1	2	0	27260646	0	0	5.01	1	1	0	5.01	1	1					359	41.4384	8.00146
P21912	Succinate dehydrogenase [ubiquinone] iron-sulfur subunit, mitochondrial OS=Homo sapiens GN=SDHB PE=1 SV=3 - [DHSB_HUMAN]	5	1	1	1	1	0	0	0	0	5	1	1									280	31.6088	8.76318
Q9H160	Inhibitor of growth protein 2 OS=Homo sapiens GN=ING2 PE=1 SV=2 - [ING2_HUMAN]	5	1	1	1	3	984030	2.12592e+06	8303117	0	5	1	1	0	5	1	1	0	5	1	1	280	32.7871	7.89893
P46977	Dolichyl-diphosphooligosaccharide--protein glycosyltransferase subunit STT3A OS=Homo sapiens GN=STT3A PE=1 SV=2 - [STT3A_HUMAN]	4.96	1	1	1	3	0	0	0					0	4.96	1	3					705	80.4768	8.07471
P35900	Keratin, type I cytoskeletal 20 OS=Homo sapiens GN=KRT20 PE=1 SV=1 - [K1C20_HUMAN]	4.95	9	1	3	34	5.80388e+07	2.58688e+07	7.34387e+07	16.9724	3.54	4	14	11.3208	4.95	5	13	9.30045	3.54	3	7	424	48.4569	5.69385
Q9NQ79-3	Isoform 3 of Cartilage acidic protein 1 OS=Homo sapiens GN=CRTAC1 - [CRAC1_HUMAN]	4.94	3	2	2	9	2.21377e+06	2.03249e+06	1.32701e+07	4.69163	1.43	2	2	9.01529	1.43	2	4	4.9257	4.94	3	3	628	68.0168	5.2876
Q9HCC9-5	Isoform 5 of Lateral signaling target protein 2 homolog OS=Homo sapiens GN=ZFYVE28 - [LST2_HUMAN]	4.92	5	1	1	2	18600.4	0	0	6.16938	4.92	1	2									773	83.1452	5.07178
P06748-2	Isoform 2 of Nucleophosmin OS=Homo sapiens GN=NPM1 - [NPM_HUMAN]	4.91	2	1	1	36	1.28378e+07	5.57655e+06	0	75.644	4.91	2	32	10.7408	4.91	2	4					265	29.4462	4.61475
Q9BZW7	Testis-specific gene 10 protein OS=Homo sapiens GN=TSGA10 PE=1 SV=1 - [TSG10_HUMAN]	4.87	1	1	2	2	0	0	6.4465e+07									2.44083	4.87	2	2	698	81.37	5.97314
Q68D10-3	Isoform 3 of Protein SPT2 homolog OS=Homo sapiens GN=SPTY2D1 - [SPT2_HUMAN]	4.84	3	1	1	1	0	646777	0					0	4.84	1	1					351	40.4171	9.65674
Q9Y2A7	Nck-associated protein 1 OS=Homo sapiens GN=NCKAP1 PE=1 SV=1 - [NCKP1_HUMAN]	4.79	2	1	3	6	1.26097e+06	1.00235e+07	0	3.97472	3.1	2	2	2.10283	3.01	2	4					1128	128.707	6.62451
P55008	Allograft inflammatory factor 1 OS=Homo sapiens GN=AIF1 PE=1 SV=1 - [AIF1_HUMAN]	4.76	1	1	1	3	2.11896e+06	0	1.01816e+07	1.68297	4.76	1	2					1.90572	4.76	1	1	147	16.6926	6.23975
P30101	Protein disulfide-isomerase A3 OS=Homo sapiens GN=PDIA3 PE=1 SV=4 - [PDIA3_HUMAN]	4.75	1	2	2	8	1.30651e+06	0	3.38225e+06	17.8621	2.97	2	6					0	1.78	2	2	505	56.7468	6.354
Q9Y6B7	AP-4 complex subunit beta-1 OS=Homo sapiens GN=AP4B1 PE=2 SV=2 - [AP4B1_HUMAN]	4.74	1	1	2	2	2.43272e+06	7.20393e+06	0	0	2.17	1	1	0	2.57	1	1					739	83.2057	5.85889
Q9P217	Zinc finger SWIM domain-containing protein 5 OS=Homo sapiens GN=ZSWIM5 PE=2 SV=2 - [ZSWM5_HUMAN]	4.73	1	0	2	5	281540	0	0	2.59823	1.77	1	1	3.44482	2.95	1	4					1185	130.551	7.18115
P41212	Transcription factor ETV6 OS=Homo sapiens GN=ETV6 PE=1 SV=1 - [ETV6_HUMAN]	4.65	1	1	1	1	0	6.16204e+06	0					2.00126	4.65	1	1					452	52.9666	7.43018
Q9H560	Putative ankyrin repeat domain-containing protein 19 OS=Homo sapiens GN=ANKRD19P PE=5 SV=1 - [ANR19_HUMAN]	4.55	1	1	1	7	2.28852e+06	1.0252e+07	0	4.84311	4.55	1	3	2.42413	4.55	1	4					264	30.4168	8.95361
P31944	Caspase-14 OS=Homo sapiens GN=CASP14 PE=1 SV=2 - [CASPE_HUMAN]	4.55	1	1	1	5	2.92006e+06	0	4.50337e+06	2.91718	4.55	2	2					4.42003	4.55	2	3	242	27.662	5.57959
Q9Y5K3-2	Isoform 1 of Choline-phosphate cytidylyltransferase B OS=Homo sapiens GN=PCYT1B - [PCY1B_HUMAN]	4.55	4	1	1	1	0	0	1.41427e+07									0	4.55	1	1	330	38.062	6.55127
Q15517	Corneodesmosin OS=Homo sapiens GN=CDSN PE=1 SV=3 - [CDSN_HUMAN]	4.54	1	1	1	4	2.82994e+06	0	1029871196	3.28946	4.54	2	2					5.46187	4.54	1	2	529	51.4902	8.35303
Q6X9E4	F-box/WD repeat-containing protein 12 OS=Homo sapiens GN=FBXW12 PE=2 SV=2 - [FBW12_HUMAN]	4.53	1	1	1	1	1.62877e+06	0	0	0	4.53	1	1									464	53.0216	7.73779
P06681	Complement C2 OS=Homo sapiens GN=C2 PE=1 SV=2 - [CO2_HUMAN]	4.52	1	2	3	18	4.57617e+06	5.1643e+06	2.6719e+07	6.61689	2.93	3	4	18.0093	4.52	5	8	8.70775	2.93	3	6	752	83.2143	7.41553
Q14694	Ubiquitin carboxyl-terminal hydrolase 10 OS=Homo sapiens GN=USP10 PE=1 SV=2 - [UBP10_HUMAN]	4.51	3	1	1	2	0	0	0					3.42596	4.51	1	2					798	87.0798	5.31299
Q8NCC5-3	Isoform 3 of Sugar phosphate exchanger 3 OS=Homo sapiens GN=SLC37A3 - [SPX3_HUMAN]	4.51	1	1	1	1	0	0	53654394									2.59538	4.51	1	1	443	48.8994	5.60498
P43121	Cell surface glycoprotein MUC18 OS=Homo sapiens GN=MCAM PE=1 SV=2 - [MUC18_HUMAN]	4.49	2	2	2	6	1.53944e+06	0	6.47671e+06	7.09837	2.32	2	2					10.4415	4.49	4	4	646	71.5626	5.75732
P50395	Rab GDP dissociation inhibitor beta OS=Homo sapiens GN=GDI2 PE=1 SV=2 - [GDIB_HUMAN]	4.49	2	1	1	1	0	3.55258e+06	0					0	4.49	1	1					445	50.6309	6.46826
P42166	Lamina-associated polypeptide 2, isoform alpha OS=Homo sapiens GN=TMPO PE=1 SV=2 - [LAP2A_HUMAN]	4.47	3	1	2	2	3.07962e+06	0	2.24435e+06	0	2.31	1	1					0	2.16	1	1	694	75.4456	7.66455
Q6EMK4	Vasorin OS=Homo sapiens GN=VASN PE=1 SV=1 - [VASN_HUMAN]	4.46	1	2	2	6	500237	0	4.94533e+06	7.01412	2.38	2	2					11.1385	4.46	4	4	673	71.6675	7.38623
Q9NZN1	Interleukin-1 receptor accessory protein-like 1 OS=Homo sapiens GN=IL1RAPL1 PE=1 SV=2 - [IRPL1_HUMAN]	4.45	1	1	2	4	0	5.17842e+06	0	2.5414	2.87	1	2	0	4.45	2	2					696	79.9175	6.22705
Q5H9I0	Transcription factor Dp family member 3 OS=Homo sapiens GN=TFDP3 PE=1 SV=1 - [TFDP3_HUMAN]	4.44	1	2	2	4	147245	4.3912e+06	1.80333e+06	2.36298	4.44	1	1	0	4.44	1	2	0	3.95	1	1	405	44.9384	6.26514
O94898	Leucine-rich repeats and immunoglobulin-like domains protein 2 OS=Homo sapiens GN=LRIG2 PE=1 SV=3 - [LRIG2_HUMAN]	4.41	1	1	3	4	2.75791e+06	4.39663e+07	0	0	1.31	1	1	1.62477	3.1	2	2	2.27737	1.5	1	1	1065	118.89	5.5542
O15061-2	Isoform 2 of Synemin OS=Homo sapiens GN=SYNM - [SYNEM_HUMAN]	4.39	2	0	2	5	3.4229e+06	1.05233e+07	0	4.83478	4.39	2	4	0	1.6	1	1					1253	140.05	5.07178
Q14623	Indian hedgehog protein OS=Homo sapiens GN=IHH PE=1 SV=4 - [IHH_HUMAN]	4.38	1	1	1	4	2.74209e+06	5.82418e+06	0	4.23643	4.38	2	2	4.17074	4.38	2	2					411	45.2223	8.76318
Q96SL1-2	Isoform 2 of Disrupted in renal carcinoma protein 2 OS=Homo sapiens GN=DIRC2 - [DIRC2_HUMAN]	4.38	2	1	1	1	0	0	0					0	4.38	1	1					411	44.1174	9.31982
Q6ZVX7	Non-specific cytotoxic cell receptor protein 1 homolog OS=Homo sapiens GN=NCCRP1 PE=1 SV=1 - [NCRP1_HUMAN]	4.36	1	1	1	2	0	0	8.03957e+06									6.18858	4.36	2	2	275	30.8279	6.62451
A6NFR6-4	Isoform 4 of Putative uncharacterized protein C5orf60 OS=Homo sapiens GN=C5orf60 - [CE060_HUMAN]	4.33	2	1	1	1	0	0	0					1.81461	4.33	1	1					277	30.581	9.5249
Q00973	Beta-1,4 N-acetylgalactosaminyltransferase 1 OS=Homo sapiens GN=B4GALNT1 PE=1 SV=2 - [B4GN1_HUMAN]	4.32	1	1	2	4	1.1502e+06	5.1156e+06	0	2.77812	3	1	1	0	1.31	2	3					533	58.8457	8.68994
Q6GMV2	SET and MYND domain-containing protein 5 OS=Homo sapiens GN=SMYD5 PE=1 SV=2 - [SMYD5_HUMAN]	4.31	1	1	1	2	1.38854e+06	0	0	0	4.31	1	2									418	47.3099	5.04639
Q13946-3	Isoform PDE7A3 of High affinity cAMP-specific 3',5'-cyclic phosphodiesterase 7A OS=Homo sapiens GN=PDE7A - [PDE7A_HUMAN]	4.25	3	1	1	1	3.3249e+06	0	0	0	4.25	1	1									424	48.7966	7.63525
Q8WUA8	Tsukushin OS=Homo sapiens GN=TSKU PE=2 SV=3 - [TSK_HUMAN]	4.25	1	1	1	4	0	1.31064e+07	1.18752e+07					6.5124	4.25	2	2	5.81263	4.25	2	2	353	37.7838	6.87354
P14625	Endoplasmin OS=Homo sapiens GN=HSP90B1 PE=1 SV=1 - [ENPL_HUMAN]	4.23	1	2	2	3	537293	0	0	5.21002	4.23	3	3									803	92.4113	4.84326
Q8TDI8	Transmembrane channel-like protein 1 OS=Homo sapiens GN=TMC1 PE=1 SV=2 - [TMC1_HUMAN]	4.21	18	1	2	19	5.13206e+06	1.21362e+07	2.80038e+07	1.75222	0.66	1	10	5.59833	4.21	2	5	0	0.66	1	4	760	87.7105	6.52197
Q9H5V8	CUB domain-containing protein 1 OS=Homo sapiens GN=CDCP1 PE=1 SV=3 - [CDCP1_HUMAN]	4.19	2	1	2	2	0	6.86865e+06	0					1.93795	4.19	2	2					836	92.8724	7.95752
Q0VAM2-2	Isoform 2 of Ras-GEF domain-containing family member 1B OS=Homo sapiens GN=RASGEF1B - [RGF1B_HUMAN]	4.18	3	1	1	3	4.86228e+06	0	5.88194e+07	2.45009	4.18	1	2					2.60384	4.18	1	1	431	50.2884	8.06006
Q99972	Myocilin OS=Homo sapiens GN=MYOC PE=1 SV=2 - [MYOC_HUMAN]	4.17	1	2	2	6	786529	0	3.72449e+06	3.67834	1.79	2	2					5.85422	4.17	4	4	504	56.9365	5.5415
O00155	Probable G-protein coupled receptor 25 OS=Homo sapiens GN=GPR25 PE=2 SV=2 - [GPR25_HUMAN]	4.16	1	1	1	4	452684	2.86374e+06	0	0	4.16	1	2	0	4.16	1	2					361	38.7536	9.30518
Q5VX52	Spermatogenesis-associated protein 1 OS=Homo sapiens GN=SPATA1 PE=2 SV=3 - [SPAT1_HUMAN]	4.12	1	1	1	1	0	8.25603e+06	0					2.24642	4.12	1	1					437	50.2755	8.42627
P49336-2	Isoform 2 of Cyclin-dependent kinase 8 OS=Homo sapiens GN=CDK8 - [CDK8_HUMAN]	4.1	2	1	1	1	0	2.58145e+06	0					0	4.1	1	1					463	53.1218	8.45557
P11171-4	Isoform 4 of Protein 4.1 OS=Homo sapiens GN=EPB41 - [41_HUMAN]	4.08	5	1	1	1	0	0	0	3.39825	4.08	1	1									588	66.3573	7.25439
A6NFE2	Uncharacterized protein C12orf70 OS=Homo sapiens GN=C12orf70 PE=2 SV=2 - [CL070_HUMAN]	4.08	1	1	1	1	0	0	2.63048e+06									0	4.08	1	1	343	39.462	4.85596
Q96GD4	Aurora kinase B OS=Homo sapiens GN=AURKB PE=1 SV=3 - [AURKB_HUMAN]	4.07	1	1	1	2	0	2.92287e+06	2.01215e+07					0	4.07	1	1	0	4.07	1	1	344	39.2856	9.29053
Q8NEP3-3	Isoform 3 of Dynein assembly factor 1, axonemal OS=Homo sapiens GN=DNAAF1 - [DAAF1_HUMAN]	4.07	2	1	1	1	0	3.96351e+06	0					0	4.07	1	1					418	47.2373	5.23682
Q8WWZ8	Oncoprotein-induced transcript 3 protein OS=Homo sapiens GN=OIT3 PE=1 SV=2 - [OIT3_HUMAN]	4.04	1	2	2	4	0	0	1.11968e+07									9.72285	4.04	4	4	545	59.9825	5.57959
P08100	Rhodopsin OS=Homo sapiens GN=RHO PE=1 SV=1 - [OPSD_HUMAN]	4.02	1	0	1	2	0	3.0454e+06	0					2.01545	4.02	1	2					348	38.8665	6.65381
Q5QJ74	Tubulin-specific chaperone cofactor E-like protein OS=Homo sapiens GN=TBCEL PE=2 SV=2 - [TBCEL_HUMAN]	4.01	1	1	1	3	584755	0	0	5.49048	4.01	1	3									424	48.1644	5.37646
Q96C24-2	Isoform 2 of Synaptotagmin-like protein 4 OS=Homo sapiens GN=SYTL4 - [SYTL4_HUMAN]	4.01	1	1	1	1	0	0	0									0	4.01	1	1	349	39.7882	8.38232
Q69YI7	Nuclear apoptosis-inducing factor 1 OS=Homo sapiens GN=NAIF1 PE=1 SV=1 - [NAIF1_HUMAN]	3.98	1	1	1	1	0	0	5.08531e+06									0	3.98	1	1	327	35.1423	7.21045
Q9Y3T6	R3H and coiled-coil domain-containing protein 1 OS=Homo sapiens GN=R3HCC1 PE=1 SV=2 - [R3HC1_HUMAN]	3.96	1	1	1	1	0	0	0	0	3.96	1	1									480	53.2266	6.26514
P02788	Lactotransferrin OS=Homo sapiens GN=LTF PE=1 SV=6 - [TRFL_HUMAN]	3.94	11	2	3	100	1.19471e+08	3.07121e+08	3.78443e+08	38.6813	3.94	5	23	75.9666	2.54	4	54	42.5103	3.94	5	23	710	78.1319	8.11865
Q86YR5-3	Isoform 3 of G-protein-signaling modulator 1 OS=Homo sapiens GN=GPSM1 - [GPSM1_HUMAN]	3.94	3	1	1	1	1.69427e+06	0	0	0	3.94	1	1									457	49.6541	8.06006
Q9C0B5-2	Isoform 2 of Palmitoyltransferase ZDHHC5 OS=Homo sapiens GN=ZDHHC5 - [ZDHC5_HUMAN]	3.93	2	1	1	1	0	0	0	0	3.93	1	1									662	71.9071	8.89502
Q9ULJ1-5	Isoform 5 of Outer dense fiber protein 2-like OS=Homo sapiens GN=ODF2L - [ODF2L_HUMAN]	3.9	5	2	3	15	2.7966e+07	6.60846e+07	2.95167e+07	3.26007	1.56	1	2	0	1.75	2	9	0	3.7	2	4	513	59.7658	7.00537
P40925	Malate dehydrogenase, cytoplasmic OS=Homo sapiens GN=MDH1 PE=1 SV=4 - [MDHC_HUMAN]	3.89	1	1	1	1	0	0	1.43904e+06									0	3.89	1	1	334	36.403	7.35693
P09668	Pro-cathepsin H OS=Homo sapiens GN=CTSH PE=1 SV=4 - [CATH_HUMAN]	3.88	1	1	1	2	806060	0	0	3.37095	3.88	2	2									335	37.369	8.07471
P61978-3	Isoform 3 of Heterogeneous nuclear ribonucleoprotein K OS=Homo sapiens GN=HNRNPK - [HNRPK_HUMAN]	3.86	3	1	1	7	1.41144e+06	0	0	22.2687	3.86	2	7									440	48.5322	5.5415
Q92887	Canalicular multispecific organic anion transporter 1 OS=Homo sapiens GN=ABCC2 PE=1 SV=3 - [MRP2_HUMAN]	3.82	1	1	4	11	7.3607e+06	8.05765e+06	2.31233e+07	4.28632	0.71	1	2	0	1.68	3	4	8.98495	2.14	2	5	1545	174.096	8.32373
P21709	Ephrin type-A receptor 1 OS=Homo sapiens GN=EPHA1 PE=1 SV=4 - [EPHA1_HUMAN]	3.79	1	1	1	1	176460	0	0	0	3.79	1	1									976	108.058	6.63916
Q86SG6	Serine/threonine-protein kinase Nek8 OS=Homo sapiens GN=NEK8 PE=1 SV=1 - [NEK8_HUMAN]	3.76	1	1	2	6	2.11694e+06	3.06746e+06	0	0	1.59	1	1	0	3.76	2	5					692	74.7585	7.81104
Q9Y6R7	IgGFc-binding protein OS=Homo sapiens GN=FCGBP PE=1 SV=3 - [FCGBP_HUMAN]	3.74	1	8	9	27	5.38847e+06	1.94676e+07	3.11228e+07	20.2063	1.87	4	4	37.8268	1.41	6	12	33.1149	3.37	9	11	5405	571.639	5.33838
Q9Y546	Leucine-rich repeat-containing protein 42 OS=Homo sapiens GN=LRRC42 PE=1 SV=1 - [LRC42_HUMAN]	3.74	1	1	1	2	1.24276e+06	2.12592e+06	0	0	3.74	1	1	0	3.74	1	1					428	48.5406	7.45947
Q0VDD7	Uncharacterized protein C19orf57 OS=Homo sapiens GN=C19orf57 PE=1 SV=2 - [CS057_HUMAN]	3.74	1	1	2	2	0	0	0					2.23759	2.69	1	1	0	1.05	1	1	668	69.5138	4.83057
Q96JG6	Coiled-coil domain-containing protein 132 OS=Homo sapiens GN=CCDC132 PE=1 SV=3 - [CC132_HUMAN]	3.73	1	1	2	15	9.61409e+06	1.60565e+07	1.10515e+07	2.60445	3.73	2	2	0	1.24	1	10	2.27612	3.73	2	3	964	111.104	6.20166
P20618	Proteasome subunit beta type-1 OS=Homo sapiens GN=PSMB1 PE=1 SV=2 - [PSB1_HUMAN]	3.73	1	1	1	2	392087	0	0	1.81206	3.73	2	2									241	26.4724	8.1333
Q9C0D0-2	Isoform 2 of Phosphatase and actin regulator 1 OS=Homo sapiens GN=PHACTR1 - [PHAR1_HUMAN]	3.72	2	1	1	1	0	269933	0					0	3.72	1	1					484	54.5735	6.72705
Q96P63	Serpin B12 OS=Homo sapiens GN=SERPINB12 PE=1 SV=1 - [SPB12_HUMAN]	3.7	1	1	2	6	4.75919e+06	0	6.96316e+06	7.79854	3.7	3	4					2.54681	1.98	2	2	405	46.2471	5.52881
P10828	Thyroid hormone receptor beta OS=Homo sapiens GN=THRB PE=1 SV=2 - [THB_HUMAN]	3.69	2	1	1	1	0	0	0									0	3.69	1	1	461	52.7533	7.10791
P02549-2	Isoform 2 of Spectrin alpha chain, erythrocyte OS=Homo sapiens GN=SPTA1 - [SPTA1_HUMAN]	3.68	2	4	4	12	2.0003e+06	0	0	49.7607	3.68	5	12									2416	279.502	5.04639
P54108	Cysteine-rich secretory protein 3 OS=Homo sapiens GN=CRISP3 PE=1 SV=1 - [CRIS3_HUMAN]	3.67	1	1	1	28	4.19272e+07	3.50054e+07	1.89587e+08	13.738	3.67	2	6	28.3867	3.67	2	12	16.406	3.67	2	10	245	27.612	7.79639
Q8IZC7	Zinc finger protein 101 OS=Homo sapiens GN=ZNF101 PE=1 SV=1 - [ZN101_HUMAN]	3.67	1	1	1	1	0	0	6.56756e+07									2.34035	3.67	1	1	436	50.3069	9.56885
O43237	Cytoplasmic dynein 1 light intermediate chain 2 OS=Homo sapiens GN=DYNC1LI2 PE=1 SV=1 - [DC1L2_HUMAN]	3.66	1	1	1	1	0	0	0									0	3.66	1	1	492	54.0655	6.37939
Q9NP80-2	Isoform 2 of Calcium-independent phospholipase A2-gamma OS=Homo sapiens GN=PNPLA8 - [PLPL8_HUMAN]	3.61	2	1	2	14	1.07327e+06	5.74938e+06	2.81534e+06	0	1.39	2	4	6.86812	3.61	3	6	0	1.39	2	4	720	81.5506	9.18799
P14384	Carboxypeptidase M OS=Homo sapiens GN=CPM PE=1 SV=2 - [CBPM_HUMAN]	3.61	1	0	1	2	0	308133	0					2.53986	3.61	1	2					443	50.4815	7.35693
P04179	Superoxide dismutase [Mn], mitochondrial OS=Homo sapiens GN=SOD2 PE=1 SV=2 - [SODM_HUMAN]	3.6	1	1	1	2	0	0	3.51608e+06									1.87127	3.6	2	2	222	24.7066	8.25049
P28331	NADH-ubiquinone oxidoreductase 75 kDa subunit, mitochondrial OS=Homo sapiens GN=NDUFS1 PE=1 SV=3 - [NDUS1_HUMAN]	3.58	1	1	1	6	4.69391e+06	6.81462e+06	0	10.7119	3.58	1	4	6.15581	3.58	1	2					727	79.4165	6.22705
P10253	Lysosomal alpha-glucosidase OS=Homo sapiens GN=GAA PE=1 SV=4 - [LYAG_HUMAN]	3.57	1	0	1	4	0	0	0	3.31779	3.57	1	1	0	3.57	1	3					952	105.257	5.99854
Q9ULD4	Bromodomain and PHD finger-containing protein 3 OS=Homo sapiens GN=BRPF3 PE=1 SV=2 - [BRPF3_HUMAN]	3.57	1	2	3	12	0	6.98738e+07	0					0	1.08	2	10	4.18186	2.49	2	2	1205	135.66	6.58057
Q9HCM4-2	Isoform 2 of Band 4.1-like protein 5 OS=Homo sapiens GN=EPB41L5 - [E41L5_HUMAN]	3.56	1	1	1	2	3.0835e+06	0	0	0	3.56	1	2									505	57.8494	9.1001
Q6NXT6-2	Isoform 2 of Transmembrane anterior posterior transformation protein 1 homolog OS=Homo sapiens GN=TAPT1 - [TAPT1_HUMAN]	3.56	2	1	1	1	0	0	0	0	3.56	1	1									562	63.4458	8.25049
Q8IXS0	Uncharacterized protein C6orf146 OS=Homo sapiens GN=C6orf146 PE=2 SV=2 - [CF146_HUMAN]	3.54	1	1	1	2	0	0	0	0	3.54	1	2									508	57.3841	8.44092
O00757	Fructose-1,6-bisphosphatase isozyme 2 OS=Homo sapiens GN=FBP2 PE=1 SV=2 - [F16P2_HUMAN]	3.54	1	1	1	25	306967	8.03568e+06	1.13514e+06	1.89566	3.54	1	1	29.5347	3.54	1	21	4.05869	3.54	1	3	339	36.7199	7.2251
Q9P289-2	Isoform 2 of Serine/threonine-protein kinase MST4 OS=Homo sapiens GN=MST4 - [MST4_HUMAN]	3.54	3	1	1	33	4.0595e+06	1.073e+07	0	44.7764	3.54	1	19	31.5469	3.54	1	14					339	37.7462	6.0874
P22304-3	Isoform 3 of Iduronate 2-sulfatase OS=Homo sapiens GN=IDS - [IDS_HUMAN]	3.53	3	1	1	6	0	3.16805e+06	1.23494e+07					0	3.53	1	2	0	3.53	1	4	312	34.8715	6.72705
P04275	von Willebrand factor OS=Homo sapiens GN=VWF PE=1 SV=4 - [VWF_HUMAN]	3.52	1	9	9	27	1.72483e+06	6.0024e+06	8.21389e+06	14.7384	1.24	6	8	25.117	2.35	11	11	14.0331	2.38	7	8	2813	309.058	5.47803
Q9NZI5-3	Isoform 3 of Grainyhead-like protein 1 homolog OS=Homo sapiens GN=GRHL1 - [GRHL1_HUMAN]	3.52	2	1	1	1	0	6.53905e+06	0					0	3.52	1	1					511	57.7769	7.7085
P29622	Kallistatin OS=Homo sapiens GN=SERPINA4 PE=1 SV=3 - [KAIN_HUMAN]	3.51	1	2	2	14	6.07606e+06	2.60876e+07	3.33725e+07	9.95179	3.51	4	4	10.8506	3.04	2	5	7.6671	3.51	3	5	427	48.5112	7.75244
O94925-3	Isoform 3 of Glutaminase kidney isoform, mitochondrial OS=Homo sapiens GN=GLS - [GLSK_HUMAN]	3.51	2	1	1	3	0	4.1632e+07	0					4.34672	3.51	1	3					598	65.4179	7.88428
P06276	Cholinesterase OS=Homo sapiens GN=BCHE PE=1 SV=1 - [CHLE_HUMAN]	3.49	1	1	1	3	0	0	4.02068e+06									8.11841	3.49	2	3	602	68.3743	7.41553
O15066	Kinesin-like protein KIF3B OS=Homo sapiens GN=KIF3B PE=1 SV=1 - [KIF3B_HUMAN]	3.48	1	1	2	4	0	2.40138e+07	3.77713e+06					4.70019	1.87	1	2	3.49975	1.61	2	2	747	85.0728	7.69385
P98187	Cytochrome P450 4F8 OS=Homo sapiens GN=CYP4F8 PE=1 SV=1 - [CP4F8_HUMAN]	3.46	1	1	1	1	119702	0	0	2.72794	3.46	1	1									520	59.9562	8.42627
P00491	Purine nucleoside phosphorylase OS=Homo sapiens GN=PNP PE=1 SV=2 - [PNPH_HUMAN]	3.46	1	1	1	2	0	1.10767e+06	0					4.55569	3.46	2	2					289	32.0972	6.94678
Q4ZIN3-2	Isoform 2 of Membralin OS=Homo sapiens GN=C19orf6 - [MBRL_HUMAN]	3.43	2	1	1	2	0	0	0	0	3.43	1	2									408	46.4005	5.56689
Q9Y2G5-2	Isoform B of GDP-fucose protein O-fucosyltransferase 2 OS=Homo sapiens GN=POFUT2 - [OFUT2_HUMAN]	3.42	3	1	1	3	3.44282e+06	0	2.7407e+07	2.16932	3.42	1	1					2.22654	3.42	1	2	380	44.0554	6.48096
P00488	Coagulation factor XIII A chain OS=Homo sapiens GN=F13A1 PE=1 SV=4 - [F13A_HUMAN]	3.42	1	1	1	1	0	1.1332e+07	0					4.41372	3.42	1	1					732	83.2146	6.0874
Q96PP8	Guanylate-binding protein 5 OS=Homo sapiens GN=GBP5 PE=2 SV=1 - [GBP5_HUMAN]	3.41	1	1	1	37	2.3977e+07	7.82061e+07	4.41896e+06	35.7302	3.41	1	16	40.9371	3.41	1	19	4.6136	3.41	1	2	586	66.575	5.5542
Q8N6M0	OTU domain-containing protein 6B OS=Homo sapiens GN=OTUD6B PE=1 SV=1 - [OTU6B_HUMAN]	3.41	1	1	1	4	0	1.84311e+06	1.61061e+06					1.62168	3.41	2	3	0	3.41	1	1	293	33.7915	6.04932
P51451	Tyrosine-protein kinase Blk OS=Homo sapiens GN=BLK PE=1 SV=3 - [BLK_HUMAN]	3.37	1	1	1	1	0	0	0					2.5003	3.37	1	1					505	57.6696	7.86963
O43865-2	Isoform 2 of Putative adenosylhomocysteinase 2 OS=Homo sapiens GN=AHCYL1 - [SAHH2_HUMAN]	3.31	2	1	1	1	0	1.01873e+07	0					0	3.31	1	1					483	53.7189	7.44482
P00338	L-lactate dehydrogenase A chain OS=Homo sapiens GN=LDHA PE=1 SV=2 - [LDHA_HUMAN]	3.31	2	1	1	1	0	0	3.91137e+06									2.35043	3.31	1	1	332	36.6654	8.26514
P46094	Chemokine XC receptor 1 OS=Homo sapiens GN=XCR1 PE=1 SV=1 - [XCR1_HUMAN]	3.3	1	1	1	1	1.29908e+06	0	0	0	3.3	1	1									333	38.4821	8.60205
Q86UD1	Out at first protein homolog OS=Homo sapiens GN=OAF PE=2 SV=1 - [OAF_HUMAN]	3.3	1	1	1	2	0	0	1.1231e+07									2.21609	3.3	2	2	273	30.6686	6.84424
P05534	HLA class I histocompatibility antigen, A-24 alpha chain OS=Homo sapiens GN=HLA-A PE=1 SV=2 - [1A24_HUMAN]	3.29	2	1	1	4	1.53246e+06	0	7.83014e+06	5.60542	3.29	2	2					4.83887	3.29	2	2	365	40.663	6.34131
P07195	L-lactate dehydrogenase B chain OS=Homo sapiens GN=LDHB PE=1 SV=2 - [LDHB_HUMAN]	3.29	1	1	1	2	1.65237e+06	0	0	4.86055	3.29	2	2									334	36.6151	6.04932
Q8IZD6	Solute carrier family 22 member 15 OS=Homo sapiens GN=SLC22A15 PE=2 SV=1 - [S22AF_HUMAN]	3.29	1	1	1	2	1.37091e+06	0	0	5.21462	3.29	1	2									547	60.5012	5.56689
P00750-4	Isoform 4 of Tissue-type plasminogen activator OS=Homo sapiens GN=PLAT - [TPA_HUMAN]	3.29	3	1	1	4	7.85075e+06	8.41585e+06	1.10392e+07	0	3.29	1	2	0	3.29	1	1	0	3.29	1	1	395	44.3444	7.48877
Q14697	Neutral alpha-glucosidase AB OS=Homo sapiens GN=GANAB PE=1 SV=3 - [GANAB_HUMAN]	3.28	2	3	3	12	765039	0	0	14.3598	3.28	6	12									944	106.807	6.13818
Q9H257-3	Isoform 3 of Caspase recruitment domain-containing protein 9 OS=Homo sapiens GN=CARD9 - [CARD9_HUMAN]	3.28	3	1	1	7	1.18958e+06	4.00862e+07	0	1.6072	3.28	1	1	8.56943	3.28	2	6					366	42.9261	5.99854
Q9UJJ9	N-acetylglucosamine-1-phosphotransferase subunit gamma OS=Homo sapiens GN=GNPTG PE=1 SV=1 - [GNPTG_HUMAN]	3.28	1	1	1	2	0	0	6107035									3.53124	3.28	2	2	305	33.9522	6.94678
Q6TDU7-2	Isoform 2 of Cancer susceptibility candidate protein 1 OS=Homo sapiens GN=CASC1 - [CASC1_HUMAN]	3.25	3	1	2	5	1.03075e+06	3.46675e+06	0	0	1.78	1	3	0	1.48	1	2					676	78.2211	5.21143
Q8IZ08	Probable G-protein coupled receptor 135 OS=Homo sapiens GN=GPR135 PE=2 SV=2 - [GP135_HUMAN]	3.24	1	1	1	2	5.44225e+06	0	0	0	3.24	1	2									494	51.703	9.77393
Q8IZF2-2	Isoform 2 of Probable G-protein coupled receptor 116 OS=Homo sapiens GN=GPR116 - [GP116_HUMAN]	3.23	3	3	3	10	2.63607e+06	0	1.06765e+07	3.94732	1	2	2					15.5501	3.23	6	8	1301	144.508	6.63916
P55290	Cadherin-13 OS=Homo sapiens GN=CDH13 PE=1 SV=1 - [CAD13_HUMAN]	3.23	1	1	1	2	0	0	6.92698e+06									6.10783	3.23	2	2	713	78.2379	4.98291
P08185	Corticosteroid-binding globulin OS=Homo sapiens GN=SERPINA6 PE=1 SV=1 - [CBG_HUMAN]	3.21	1	1	1	44	7.99545e+06	1.03531e+08	112987088	34.693	3.21	2	14	30.0233	3.21	2	12	43.3082	3.21	2	18	405	45.1119	6.03662
A6NFQ2-3	Isoform 3 of Protein FAM115C OS=Homo sapiens GN=FAM115C - [F115C_HUMAN]	3.19	3	1	2	4	0	1.75511e+06	5.55948e+07					0	0.86	1	1	0	2.33	1	3	815	90.5649	7.69385
Q9UID3-2	Isoform 2 of Protein fat-free homolog OS=Homo sapiens GN=FFR - [FFR_HUMAN]	3.19	2	1	1	1	0	0	6.41548e+06									0	3.19	1	1	658	72.6097	7.13721
Q15084	Protein disulfide-isomerase A6 OS=Homo sapiens GN=PDIA6 PE=1 SV=1 - [PDIA6_HUMAN]	3.18	2	1	1	2	0	1.0754e+06	0					5.45141	3.18	2	2					440	48.0913	5.08447
Q66K64	DDB1- and CUL4-associated factor 15 OS=Homo sapiens GN=DCAF15 PE=1 SV=1 - [DCA15_HUMAN]	3.17	1	1	1	1	7.89261e+06	0	0	0	3.17	1	1									600	66.421	6.58057
Q16566	Calcium/calmodulin-dependent protein kinase type IV OS=Homo sapiens GN=CAMK4 PE=1 SV=1 - [KCC4_HUMAN]	3.17	1	1	1	11	6.72659e+06	5.12454e+06	9.30265e+06	0	3.17	1	2	0	3.17	1	7	0	3.17	1	2	473	51.8928	5.8208
Q86X45-2	Isoform 2 of Protein TILB homolog OS=Homo sapiens GN=LRRC6 - [TILB_HUMAN]	3.14	2	1	1	1	0	3.97617e+07	0					2.28774	3.14	1	1					414	48.0888	6.55127
P12081	Histidine--tRNA ligase, cytoplasmic OS=Homo sapiens GN=HARS PE=1 SV=2 - [SYHC_HUMAN]	3.14	1	1	1	2	0	0	7.14635e+06									4.69465	3.14	1	2	509	57.3742	5.88428
O43303-2	Isoform 2 of Centriolar coiled-coil protein of 110 kDa OS=Homo sapiens GN=CCP110 - [CP110_HUMAN]	3.13	2	1	1	5	0	7.31712e+06	90755865					2.56618	3.13	1	1	5.62342	3.13	1	4	991	111.153	8.30908
Q8ND90	Paraneoplastic antigen Ma1 OS=Homo sapiens GN=PNMA1 PE=1 SV=2 - [PNMA1_HUMAN]	3.12	1	1	1	3	0	1.64576e+07	6.68998e+07					0	3.12	1	1	0	3.12	1	2	353	39.7363	4.83057
Q7Z589	Protein EMSY OS=Homo sapiens GN=EMSY PE=1 SV=2 - [EMSY_HUMAN]	3.1	3	1	3	13	3.39862e+08	9.7603e+06	5.7402e+06	8.68851	1.89	2	4	5.75698	3.1	4	8	0	0.61	1	1	1322	141.381	9.33447
P22735	Protein-glutamine gamma-glutamyltransferase K OS=Homo sapiens GN=TGM1 PE=1 SV=4 - [TGM1_HUMAN]	3.06	1	1	2	3	0	0	4.76491e+06									0	3.06	3	3	817	89.7303	6.03662
Q13576	Ras GTPase-activating-like protein IQGAP2 OS=Homo sapiens GN=IQGAP2 PE=1 SV=4 - [IQGA2_HUMAN]	3.05	1	1	2	3	272521	0	0	2.59418	2.29	1	1					0	0.76	1	2	1575	180.465	5.64307
Q9P2N6-8	Isoform 8 of Uncharacterized protein KIAA1310 OS=Homo sapiens GN=KIAA1310 - [K1310_HUMAN]	3.02	7	1	1	2	0	509868	5.67447e+06					0	3.02	1	1	0	3.02	1	1	530	58.1623	8.80713
O75122	CLIP-associating protein 2 OS=Homo sapiens GN=CLASP2 PE=1 SV=2 - [CLAP2_HUMAN]	3.01	1	0	1	6	0	0	0	3.09741	3.01	1	6									1294	141.046	8.47021
P02545-2	Isoform C of Prelamin-A/C OS=Homo sapiens GN=LMNA - [LMNA_HUMAN]	2.97	3	1	2	4	3.9167e+06	0	0	4.44072	2.97	3	4									572	65.0956	6.84424
O43526-4	Isoform 4 of Potassium voltage-gated channel subfamily KQT member 2 OS=Homo sapiens GN=KCNQ2 - [KCNQ2_HUMAN]	2.97	5	1	1	1	0	4.43036e+07	0					0	2.97	1	1					841	92.5373	9.21729
Q86TD4-2	Isoform 2 of Sarcalumenin OS=Homo sapiens GN=SRL - [SRCA_HUMAN]	2.96	2	1	1	21	3.45275e+06	9.43506e+06	0	2.19117	2.96	2	8	2.07034	2.96	2	13					473	54.3962	6.34131
P04181	Ornithine aminotransferase, mitochondrial OS=Homo sapiens GN=OAT PE=1 SV=1 - [OAT_HUMAN]	2.96	1	1	1	1	3.37269e+06	0	0	0	2.96	1	1									439	48.5042	7.03467
A2CJ06	Dystrotelin OS=Homo sapiens GN=DYTN PE=2 SV=1 - [DYTN_HUMAN]	2.94	1	1	1	5	3.25955e+06	6.17489e+06	0	2.11612	2.94	1	1	0	2.94	1	4					578	65.2787	8.99756
P13473	Lysosome-associated membrane glycoprotein 2 OS=Homo sapiens GN=LAMP2 PE=1 SV=2 - [LAMP2_HUMAN]	2.93	2	1	1	3	479259	0	0	9.47735	2.93	2	3									410	44.9323	5.63037
P22626-2	Isoform A2 of Heterogeneous nuclear ribonucleoproteins A2/B1 OS=Homo sapiens GN=HNRNPA2B1 - [ROA2_HUMAN]	2.93	2	1	1	6	1.38207e+07	0	0	18.9935	2.93	2	6									341	35.9839	8.646
Q53H76-2	Isoform 2 of Phospholipase A1 member A OS=Homo sapiens GN=PLA1A - [PLA1A_HUMAN]	2.93	2	1	1	1	0	0	0									1.64476	2.93	1	1	376	40.7576	6.04932
Q9H095-2	Isoform 2 of IQ domain-containing protein G OS=Homo sapiens GN=IQCG - [IQCG_HUMAN]	2.9	2	1	1	8	0	298316962	7.13778e+07					6.31729	2.9	1	5	3.45506	2.9	1	3	345	40.9016	9.39307
P02750	Leucine-rich alpha-2-glycoprotein OS=Homo sapiens GN=LRG1 PE=1 SV=2 - [A2GL_HUMAN]	2.88	1	1	1	4	0	0	4.78927e+06									6.89506	2.88	2	4	347	38.1541	6.94678
Q6P1M9	Armadillo repeat-containing X-linked protein 5 OS=Homo sapiens GN=ARMCX5 PE=2 SV=1 - [ARMX5_HUMAN]	2.87	1	1	1	3	0	0	0									0	2.87	1	3	558	62.3066	8.73389
Q9H1J5	Protein Wnt-8a OS=Homo sapiens GN=WNT8A PE=2 SV=2 - [WNT8A_HUMAN]	2.85	2	1	2	12	4.14009e+06	9.53532e+06	1.94865e+07	0	1.42	1	2	0	2.85	3	9	0	2.85	1	1	351	38.8234	7.76709
P12259	Coagulation factor V OS=Homo sapiens GN=F5 PE=1 SV=4 - [FA5_HUMAN]	2.83	1	5	5	22	3.24625e+06	3.1623e+06	1.29673e+07	17.3608	1.8	5	11	3.17292	1.35	3	3	17.1183	2.2	8	8	2224	251.546	6.04932
O00506	Serine/threonine-protein kinase 25 OS=Homo sapiens GN=STK25 PE=1 SV=1 - [STK25_HUMAN]	2.82	1	1	1	11	1.52582e+06	7279383	0	5.23534	2.82	1	2	22.4999	2.82	1	9					426	48.0818	6.7417
A6NCF5	Kelch-like protein 33 OS=Homo sapiens GN=KLHL33 PE=2 SV=2 - [KLH33_HUMAN]	2.81	1	1	1	1	0	0	4.11874e+06									0	2.81	1	1	533	57.7726	7.35693
Q8NHU2-3	Isoform 3 of Uncharacterized protein C20orf26 OS=Homo sapiens GN=C20orf26 - [CT026_HUMAN]	2.77	3	1	1	2	683467	0	0	4.66248	2.77	1	2									470	53.5164	5.16064
Q8NI99	Angiopoietin-related protein 6 OS=Homo sapiens GN=ANGPTL6 PE=1 SV=1 - [ANGL6_HUMAN]	2.77	1	1	1	2	0	972767	0					6.06499	2.77	2	2					470	51.6621	8.52881
Q8WV16-2	Isoform 2 of DDB1- and CUL4-associated factor 4 OS=Homo sapiens GN=DCAF4 - [DCAF4_HUMAN]	2.77	2	1	1	5	0	2.3368e+06	9.30565e+06					0	2.77	1	2	0	2.77	1	3	433	48.9016	9.27588
P14210-3	Isoform 3 of Hepatocyte growth factor OS=Homo sapiens GN=HGF - [HGF_HUMAN]	2.77	2	1	1	1	0	0	6.10186e+06									3.12224	2.77	1	1	723	82.548	7.88428
P11277-3	Isoform 3 of Spectrin beta chain, erythrocyte OS=Homo sapiens GN=SPTB - [SPTB1_HUMAN]	2.75	3	2	3	8	2.13092e+06	2.13106e+06	0	29.9583	2.28	2	7	0	0.47	1	1					2106	242.652	5.35107
Q9NVU0-3	Isoform 3 of DNA-directed RNA polymerase III subunit RPC5 OS=Homo sapiens GN=POLR3E - [RPC5_HUMAN]	2.75	3	1	1	3	0	0	2.78985e+07									0	2.75	1	3	654	73.0931	6.7124
O00533	Neural cell adhesion molecule L1-like protein OS=Homo sapiens GN=CHL1 PE=1 SV=4 - [CHL1_HUMAN]	2.73	2	3	3	5	0	2.39478e+06	0					9.68038	2.73	5	5					1208	134.987	5.75732
P57071	PR domain zinc finger protein 15 OS=Homo sapiens GN=PRDM15 PE=2 SV=4 - [PRD15_HUMAN]	2.72	1	1	2	3	1.27573e+07	0	3.0858e+07	0	1.06	1	1					0	2.72	2	2	1507	169.161	8.23584
Q9UM54-5	Isoform 5 of Myosin-VI OS=Homo sapiens GN=MYO6 - [MYO6_HUMAN]	2.71	10	1	3	11	1.95018e+08	3.3755e+08	3.5095e+07	6.15049	1.92	2	5	0	0.4	1	3	0	1.2	2	3	1253	144.95	8.55811
Q8IVF5	T-lymphoma invasion and metastasis-inducing protein 2 OS=Homo sapiens GN=TIAM2 PE=2 SV=4 - [TIAM2_HUMAN]	2.7	5	1	2	2	0	0	1.65348e+07									0	2.7	2	2	1701	189.985	7.21045
Q76N89	E3 ubiquitin-protein ligase HECW1 OS=Homo sapiens GN=HECW1 PE=1 SV=3 - [HECW1_HUMAN]	2.68	1	1	1	1	0	0	0					0	2.68	1	1					1606	179.442	5.50342
O75882-3	Isoform 3 of Attractin OS=Homo sapiens GN=ATRN - [ATRN_HUMAN]	2.67	3	4	4	69	4.52026e+06	9.1835e+06	3.22987e+07	26.3803	1.84	6	11	66.0874	2.67	8	30	50.7089	2.67	8	28	1198	133.613	6.97607
Q92800-4	Isoform 4 of Histone-lysine N-methyltransferase EZH1 OS=Homo sapiens GN=EZH1 - [EZH1_HUMAN]	2.66	3	1	1	5	409881	21036239	0	2.58038	2.66	1	1	4.95546	2.66	1	4					677	76.9021	6.90283
Q68DX3-2	Isoform 2 of FERM and PDZ domain-containing protein 2 OS=Homo sapiens GN=FRMPD2 - [FRPD2_HUMAN]	2.65	2	1	3	4	0	917301	2.65065e+06					0	1.17	1	2	0	1.48	2	2	1284	141.366	6.7124
O95155-2	Isoform 2 of Ubiquitin conjugation factor E4 B OS=Homo sapiens GN=UBE4B - [UBE4B_HUMAN]	2.64	3	1	2	3	0	2.01738e+06	3.38731e+08					0	1.11	1	1	0	1.53	1	2	1173	133.19	6.07471
Q96FN5	Kinesin-like protein KIF12 OS=Homo sapiens GN=KIF12 PE=2 SV=3 - [KIF12_HUMAN]	2.63	1	1	1	4	2.02543e+07	5.26891e+07	2.00677e+08	2.05069	2.63	1	1	4.425	2.63	1	2	0	2.63	1	1	646	70.6152	8.85107
Q6NT76-4	Isoform 4 of Homeobox-containing protein 1 OS=Homo sapiens GN=HMBOX1 - [HMBX1_HUMAN]	2.63	5	1	1	1	0	1.40067e+06	0					0	2.63	1	1					304	34.607	8.70459
Q9H6E5	Speckle targeted PIP5K1A-regulated poly(A) polymerase OS=Homo sapiens GN=TUT1 PE=1 SV=2 - [STPAP_HUMAN]	2.63	1	1	1	1	0	0	3.96103e+07									0	2.63	1	1	874	93.7884	6.16357
P08238	Heat shock protein HSP 90-beta OS=Homo sapiens GN=HSP90AB1 PE=1 SV=4 - [HS90B_HUMAN]	2.62	1	1	1	4	1.79612e+06	0	0	15.6209	2.62	2	4									724	83.2121	5.03369
Q13835-2	Isoform 1 of Plakophilin-1 OS=Homo sapiens GN=PKP1 - [PKP1_HUMAN]	2.62	2	2	2	6	2.25031e+06	0	0	9.73116	2.62	4	6									726	80.4455	8.96826
Q8NEZ3	WD repeat-containing protein 19 OS=Homo sapiens GN=WDR19 PE=2 SV=2 - [WDR19_HUMAN]	2.61	1	1	2	5	3.85949e+06	7.21928e+06	1.95229e+07	0	1.27	1	1	0	1.27	1	1	2.0685	2.61	2	3	1342	151.483	6.354
P00748	Coagulation factor XII OS=Homo sapiens GN=F12 PE=1 SV=3 - [FA12_HUMAN]	2.6	1	2	2	26	4.20858e+06	1.5109e+07	6.69774e+06	23.6987	1.3	2	10	20.3188	2.6	3	12	7.60981	1.3	2	4	615	67.7479	7.73779
Q08188	Protein-glutamine gamma-glutamyltransferase E OS=Homo sapiens GN=TGM3 PE=1 SV=4 - [TGM3_HUMAN]	2.6	1	1	1	2	0	0	3.0165e+06									3.24547	2.6	2	2	693	76.5836	5.85889
P09001	39S ribosomal protein L3, mitochondrial OS=Homo sapiens GN=MRPL3 PE=1 SV=1 - [RM03_HUMAN]	2.59	1	1	1	1	0	6.16427e+06	0					2.04144	2.59	1	1					348	38.6081	9.48096
P28347	Transcriptional enhancer factor TEF-1 OS=Homo sapiens GN=TEAD1 PE=1 SV=2 - [TEAD1_HUMAN]	2.58	4	1	1	1	0	0	0					0	2.58	1	1					426	47.915	8.14795
Q5C9Z4	Nucleolar MIF4G domain-containing protein 1 OS=Homo sapiens GN=NOM1 PE=1 SV=1 - [NOM1_HUMAN]	2.56	1	1	1	1	0	0	0									0	2.56	1	1	860	96.1976	8.104
Q99835	Smoothened homolog OS=Homo sapiens GN=SMO PE=1 SV=1 - [SMO_HUMAN]	2.54	1	0	2	19	1.3362e+08	5.04566e+08	9.20204e+07	0	0.76	1	3	2.42795	2.54	3	14	0	0.76	2	2	787	86.341	8.33838
Q15392	Delta(24)-sterol reductase OS=Homo sapiens GN=DHCR24 PE=1 SV=2 - [DHC24_HUMAN]	2.52	1	1	1	1	0	1.42326e+06	0					2.86522	2.52	1	1					516	60.062	8.1626
P51854-1	Isoform 2 of Transketolase-like protein 1 OS=Homo sapiens GN=TKTL1 - [TKTL1_HUMAN]	2.51	2	1	1	4	0	2.72218e+06	0					0	2.51	1	4					557	61.1605	5.87158
Q96RQ3	Methylcrotonoyl-CoA carboxylase subunit alpha, mitochondrial OS=Homo sapiens GN=MCCC1 PE=1 SV=3 - [MCCA_HUMAN]	2.48	1	1	1	3	0	9.23778e+06	0					0	2.48	1	3					725	80.4219	7.78174
O60292	Signal-induced proliferation-associated 1-like protein 3 OS=Homo sapiens GN=SIPA1L3 PE=1 SV=3 - [SI1L3_HUMAN]	2.47	1	1	2	3	5.9076e+06	0	0	3.05142	2.47	2	3									1781	194.49	8.32373
Q8IZE3-2	Isoform 2 of Protein-associating with the carboxyl-terminal domain of ezrin OS=Homo sapiens GN=SCYL3 - [PACE1_HUMAN]	2.47	2	1	1	2	1.29378e+06	1.01053e+06	0	0	2.47	1	1	0	2.47	1	1					688	76.6822	4.93213
Q6Q788	Apolipoprotein A-V OS=Homo sapiens GN=APOA5 PE=1 SV=1 - [APOA5_HUMAN]	2.46	1	1	1	2	0	950017	0					5.2993	2.46	2	2					366	41.1871	6.43018
Q8NBF2-2	Isoform 2 of NHL repeat-containing protein 2 OS=Homo sapiens GN=NHLRC2 - [NHLC2_HUMAN]	2.45	2	1	1	1	659398	0	0	2.44328	2.45	1	1									367	39.672	5.70654
O94901-5	Isoform 5 of SUN domain-containing protein 1 OS=Homo sapiens GN=SUN1 - [SUN1_HUMAN]	2.42	2	1	1	1	5.14925e+06	0	0	0	2.42	1	1									702	77.8624	7.07861
O95985-3	Isoform 3 of DNA topoisomerase 3-beta-1 OS=Homo sapiens GN=TOP3B - [TOP3B_HUMAN]	2.4	5	0	2	4	1.47304e+06	1.9808e+06	0	0	0.85	2	2	0	2.4	2	2					707	79.7871	7.92822
O94804	Serine/threonine-protein kinase 10 OS=Homo sapiens GN=STK10 PE=1 SV=1 - [STK10_HUMAN]	2.38	1	1	2	2	0	1.74416e+06	1.04534e+06					1.73924	0.83	1	1	1.7846	1.55	1	1	968	112.065	6.94678
Q8N1N0	C-type lectin domain family 4 member F OS=Homo sapiens GN=CLEC4F PE=2 SV=2 - [CLC4F_HUMAN]	2.38	1	1	1	1	0	0	0					0	2.38	1	1					589	65.4781	6.69775
P49116	Nuclear receptor subfamily 2 group C member 2 OS=Homo sapiens GN=NR2C2 PE=1 SV=1 - [NR2C2_HUMAN]	2.35	2	1	1	6	0	3.7056e+07	0					0	2.35	1	6					596	65.3731	6.27783
Q3KQV9-2	Isoform 2 of UDP-N-acetylhexosamine pyrophosphorylase-like protein 1 OS=Homo sapiens GN=UAP1L1 - [UAP1L_HUMAN]	2.34	2	1	1	6	8448722	3.03122e+07	0	0	2.34	1	2	0	2.34	1	4					384	42.8027	5.21143
Q70Z35	Phosphatidylinositol 3,4,5-trisphosphate-dependent Rac exchanger 2 protein OS=Homo sapiens GN=PREX2 PE=2 SV=1 - [PREX2_HUMAN]	2.3	2	1	3	17	3.08687e+06	1.60032e+07	2.30034e+06	0	1.49	2	5	0	1.93	2	11	0	0.37	1	1	1606	182.505	7.44482
A6NC98-5	Isoform 5 of Coiled-coil domain-containing protein 88B OS=Homo sapiens GN=CCDC88B - [CC88B_HUMAN]	2.3	3	1	1	4	2.63018e+06	3.49478e+06	0	0	2.3	1	3	0	2.3	1	1					696	78.9546	7.62061
P18428	Lipopolysaccharide-binding protein OS=Homo sapiens GN=LBP PE=1 SV=3 - [LBP_HUMAN]	2.29	1	1	1	4	0	1.11333e+07	2.164e+07					5.09214	2.29	2	2	4.82666	2.29	2	2	481	53.3499	6.69775
Q9BX26	Synaptonemal complex protein 2 OS=Homo sapiens GN=SYCP2 PE=2 SV=2 - [SYCP2_HUMAN]	2.29	1	1	2	2	0	4.79245e+07	0					2.5644	1.76	1	1	0	0.52	1	1	1530	175.529	8.85107
P55103	Inhibin beta C chain OS=Homo sapiens GN=INHBC PE=1 SV=1 - [INHBC_HUMAN]	2.27	1	1	1	4	3.9863e+06	0	2.25487e+07	1.63505	2.27	2	2					3.55955	2.27	2	2	352	38.2134	7.10791
Q9ULD0-3	Isoform 3 of 2-oxoglutarate dehydrogenase-like, mitochondrial OS=Homo sapiens GN=OGDHL - [OGDHL_HUMAN]	2.25	3	1	1	2	1.92711e+06	0	0	2.906	2.25	2	2									801	91.1738	6.82959
Q96NG5	Zinc finger protein 558 OS=Homo sapiens GN=ZNF558 PE=2 SV=1 - [ZN558_HUMAN]	2.24	1	1	1	8	4.75189e+06	0	7.23591e+06	1.6824	2.24	2	4					3.31994	2.24	2	4	402	45.7256	8.95361
Q9NZB2-2	Isoform B of Constitutive coactivator of PPAR-gamma-like protein 1 OS=Homo sapiens GN=FAM120A - [F120A_HUMAN]	2.23	5	1	1	1	0	0	33366337									0	2.23	1	1	628	68.9486	7.88428
Q7Z7L1	Schlafen family member 11 OS=Homo sapiens GN=SLFN11 PE=1 SV=2 - [SLN11_HUMAN]	2.22	1	1	1	4	0	110684	154380168					0	2.22	1	1	5.05267	2.22	1	3	901	102.77	7.76709
P05388	60S acidic ribosomal protein P0 OS=Homo sapiens GN=RPLP0 PE=1 SV=1 - [RLA0_HUMAN]	2.21	2	1	1	6	518795	0	0	0	2.21	2	6									317	34.2518	5.97314
A7MBM2	Protein dispatched homolog 2 OS=Homo sapiens GN=DISP2 PE=2 SV=2 - [DISP2_HUMAN]	2.21	1	1	1	1	0	0	0									0	2.21	1	1	1401	151.906	7.85498
Q8NFY4-3	Isoform 2 of Semaphorin-6D OS=Homo sapiens GN=SEMA6D - [SEM6D_HUMAN]	2.2	7	1	2	5	1.72026e+06	2.87519e+06	0	2.80285	1.2	1	1	4.63727	2.2	2	4					998	111.659	8.66064
P42679	Megakaryocyte-associated tyrosine-protein kinase OS=Homo sapiens GN=MATK PE=1 SV=1 - [MATK_HUMAN]	2.17	1	1	1	39	4.41399e+08	8.9352e+08	212448090	13.5349	2.17	2	11	8.02522	2.17	2	15	15.4194	2.17	2	13	507	56.4331	8.80713
P14151	L-selectin OS=Homo sapiens GN=SELL PE=1 SV=2 - [LYAM1_HUMAN]	2.15	1	1	1	8	3.60045e+06	3.20135e+06	2.2024e+07	6.6518	2.15	2	4	2.21982	2.15	2	2	2.24203	2.15	2	2	372	42.1589	6.59521
Q8IZF6-2	Isoform 2 of Probable G-protein coupled receptor 112 OS=Homo sapiens GN=GPR112 - [GP112_HUMAN]	2.14	3	0	4	12	0	6.59622e+06	6.87409e+06					1.72665	0.43	1	1	0	1.71	3	11	2804	301.425	6.25244
Q8NGR9	Olfactory receptor 1N2 OS=Homo sapiens GN=OR1N2 PE=2 SV=2 - [OR1N2_HUMAN]	2.12	1	1	1	2	0	3.24724e+07	0					3.35893	2.12	1	2					330	36.864	7.81104
Q96JA4-2	Isoform 2 of Membrane-spanning 4-domains subfamily A member 14 OS=Homo sapiens GN=MS4A14 - [M4A14_HUMAN]	2.11	2	1	1	1	0	1.80254e+06	0					0	2.11	1	1					662	74.6114	5.47803
P24821-6	Isoform 6 of Tenascin OS=Homo sapiens GN=TNC - [TENA_HUMAN]	2.11	6	1	2	3	0	817951	0					3.70357	0.58	2	2	0	1.53	1	1	1564	171.249	5.09717
Q5JV73	FERM and PDZ domain-containing protein 3 OS=Homo sapiens GN=FRMPD3 PE=2 SV=2 - [FRPD3_HUMAN]	2.1	1	2	2	6	0	1.88534e+08	0	2.7876	1.16	1	1	6.62675	2.1	2	5					1810	199.085	8.14795
O60840-2	Isoform 2 of Voltage-dependent L-type calcium channel subunit alpha-1F OS=Homo sapiens GN=CACNA1F - [CAC1F_HUMAN]	2.09	2	1	1	1	0	0	0	4.63561	2.09	1	1									1966	219.355	6.07471
Q5SZB4	Uncharacterized protein C9orf50 OS=Homo sapiens GN=C9orf50 PE=2 SV=1 - [CI050_HUMAN]	2.09	1	1	1	15	9.9688e+06	3518669	3.23196e+07	0	2.09	1	6	0	2.09	1	4	0	2.09	1	5	431	47.6099	10.3599
Q01459	Di-N-acetylchitobiase OS=Homo sapiens GN=CTBS PE=1 SV=1 - [DIAC_HUMAN]	2.08	1	1	1	8	0	0	1.71427e+07	5.34591	2.08	2	4					3.43776	2.08	2	4	385	43.7316	6.63916
P32004-2	Isoform 2 of Neural cell adhesion molecule L1 OS=Homo sapiens GN=L1CAM - [L1CAM_HUMAN]	2.08	2	1	2	25	9.51489e+07	1.22844e+08	4.13853e+07	3.39804	0.56	1	7	9.91633	2.08	2	16	0	0.56	1	2	1253	139.43	6.23975
Q9Y3Q4	Potassium/sodium hyperpolarization-activated cyclic nucleotide-gated channel 4 OS=Homo sapiens GN=HCN4 PE=1 SV=1 - [HCN4_HUMAN]	2.08	1	1	2	2	0	2.87856e+06	2.18049e+07					0	0.91	1	1	2.3469	1.16	1	1	1203	128.961	8.90967
Q76G19	PDZ domain-containing protein 4 OS=Homo sapiens GN=PDZD4 PE=2 SV=1 - [PDZD4_HUMAN]	2.08	1	1	1	1	0	0	1.06169e+07									0	2.08	1	1	769	86.1173	6.12549
P38646	Stress-70 protein, mitochondrial OS=Homo sapiens GN=HSPA9 PE=1 SV=2 - [GRP75_HUMAN]	2.06	1	1	1	2	1.659e+06	0	0	5.95616	2.06	2	2									679	73.6348	6.16357
Q8NF99	Zinc finger protein 397 OS=Homo sapiens GN=ZNF397 PE=1 SV=2 - [ZN397_HUMAN]	2.06	1	1	1	19	9.75462e+07	5.4153e+07	325785349	7.95522	2.06	1	4	23.0856	2.06	1	12	5.77127	2.06	1	3	534	61.1	7.26904
Q9P260	LisH domain and HEAT repeat-containing protein KIAA1468 OS=Homo sapiens GN=KIAA1468 PE=1 SV=2 - [K1468_HUMAN]	2.06	2	1	2	3	0	3.36899e+07	0					1.60331	2.06	2	3					1216	134.545	5.45264
Q9H3N8	Histamine H4 receptor OS=Homo sapiens GN=HRH4 PE=1 SV=2 - [HRH4_HUMAN]	2.05	1	1	1	5	0	74191854	0	0	2.05	1	1	0	2.05	1	4					390	44.4671	9.5542
P24723	Protein kinase C eta type OS=Homo sapiens GN=PRKCH PE=1 SV=4 - [KPCL_HUMAN]	2.05	1	1	1	4	3.11088e+06	2.82263e+07	0	4.73072	2.05	1	3	2.1497	2.05	1	1					683	77.778	7.76709
Q9P2E2-3	Isoform 2 of Kinesin-like protein KIF17 OS=Homo sapiens GN=KIF17 - [KIF17_HUMAN]	2.04	4	1	2	8	3.30194e+06	9.44886e+06	8.6261e+06	0	2.04	2	2	0	0.49	2	4	0	0.49	1	2	1028	114.926	5.50342
P27824	Calnexin OS=Homo sapiens GN=CANX PE=1 SV=2 - [CALX_HUMAN]	2.03	1	1	1	2	439175	0	0	2.3514	2.03	1	2									592	67.5259	4.60205
Q5HYK7-5	Isoform 5 of SH3 domain-containing protein 19 OS=Homo sapiens GN=SH3D19 - [SH319_HUMAN]	2.02	5	1	1	1	2.35939e+06	0	0	0	2.02	1	1									397	44.6385	5.68115
Q7Z2K8-2	Isoform 2 of G protein-regulated inducer of neurite outgrowth 1 OS=Homo sapiens GN=GPRIN1 - [GRIN1_HUMAN]	2.01	2	1	1	26	1.04667e+06	1.02529e+08	1.85785e+08	0	2.01	1	4	0	2.01	1	11	0	2.01	1	11	798	80.8976	8.51416
Q9HC56-2	Isoform 2 of Protocadherin-9 OS=Homo sapiens GN=PCDH9 - [PCDH9_HUMAN]	2	2	1	1	1	1.08032e+06	0	0	2.35475	2	1	1									1203	132.17	5.46533
Q16798	NADP-dependent malic enzyme, mitochondrial OS=Homo sapiens GN=ME3 PE=2 SV=2 - [MAON_HUMAN]	1.99	1	1	1	4	0	12389770	914966					0	1.99	1	3	0	1.99	1	1	604	67.0256	7.97217
P12111	Collagen alpha-3(VI) chain OS=Homo sapiens GN=COL6A3 PE=1 SV=5 - [CO6A3_HUMAN]	1.98	2	2	4	9	5.6257e+06	7.09363e+06	6.40606e+06	2.9827	1.26	3	4	2.60321	0.85	1	2	2.97122	0.72	3	3	3177	343.457	6.68311
O95831-3	Isoform 3 of Apoptosis-inducing factor 1, mitochondrial OS=Homo sapiens GN=AIFM1 - [AIFM1_HUMAN]	1.97	3	1	1	2	0	2.41762e+06	15923326					1.76078	1.97	1	1	0	1.97	1	1	609	66.2536	8.93896
Q14416	Metabotropic glutamate receptor 2 OS=Homo sapiens GN=GRM2 PE=2 SV=2 - [GRM2_HUMAN]	1.95	1	0	1	4	0	0	1.54495e+06									0	1.95	1	4	872	95.5064	8.11865
Q9C0H6	Kelch-like protein 4 OS=Homo sapiens GN=KLHL4 PE=2 SV=2 - [KLHL4_HUMAN]	1.95	2	1	1	1	0	0	2.09341e+07									0	1.95	1	1	718	80.1941	6.85889
Q9UHL3	Protein FAM153A OS=Homo sapiens GN=FAM153A PE=2 SV=2 - [F153A_HUMAN]	1.94	3	0	1	10	2.02362e+06	4.32588e+07	39733251	0	1.94	1	1	0	1.94	2	3	0	1.94	2	6	310	34.69	4.75439
A6ND36	Protein FAM83G OS=Homo sapiens GN=FAM83G PE=1 SV=2 - [FA83G_HUMAN]	1.94	1	1	1	3	0	0	0									0	1.94	1	3	823	90.7787	6.39209
Q8N350	Protein Dos OS=Homo sapiens GN=DOS PE=1 SV=2 - [DOS_HUMAN]	1.93	1	1	1	6	203438	8.6799e+06	0	2.46358	1.93	2	4	0	1.93	1	2					725	75.7756	6.60986
Q14832	Metabotropic glutamate receptor 3 OS=Homo sapiens GN=GRM3 PE=1 SV=2 - [GRM3_HUMAN]	1.93	1	0	1	4	0	0	1.54495e+06									0	1.93	1	4	879	98.8147	7.66455
Q8TC57-2	Isoform 2 of Uncharacterized protein C2orf65 OS=Homo sapiens GN=C2orf65 - [CB065_HUMAN]	1.92	2	1	1	1	0	0	0	1.76243	1.92	1	1									365	40.9735	6.22705
O14526-2	Isoform 2 of FCH domain only protein 1 OS=Homo sapiens GN=FCHO1 - [FCHO1_HUMAN]	1.91	2	1	1	2	0	4.60602e+07	2.99535e+07					2.31394	1.91	1	1	2.08131	1.91	1	1	888	96.5686	6.96143
Q68CZ2-2	Isoform 2 of Tensin-3 OS=Homo sapiens GN=TNS3 - [TENS3_HUMAN]	1.91	2	1	1	1	0	0	0					0	1.91	1	1					1205	128.985	7.1958
Q92609	TBC1 domain family member 5 OS=Homo sapiens GN=TBC1D5 PE=1 SV=1 - [TBCD5_HUMAN]	1.89	1	1	1	6	2.07122e+06	4.90072e+06	7.48148e+06	0	1.89	2	2	1.71251	1.89	2	2	0	1.89	2	2	795	88.9486	6.53662
Q9P2D8-2	Isoform 2 of Protein unc-79 homolog OS=Homo sapiens GN=UNC79 - [UNC79_HUMAN]	1.87	3	1	3	16	7.46396e+06	7.4893e+06	0	0	0.65	1	4	2.49965	1.87	4	12					2458	275.256	6.29053
Q13939	Calicin OS=Homo sapiens GN=CCIN PE=2 SV=3 - [CALI_HUMAN]	1.87	1	1	1	6	0	0	1.24718e+06					2.03408	1.87	1	2	0	1.87	1	4	588	66.5388	8.17725
O60229-2	Isoform 2 of Kalirin OS=Homo sapiens GN=KALRN - [KALRN_HUMAN]	1.86	7	2	3	3	586607	0	3.10204e+07	1.93052	0.72	1	1					2.16802	1.86	2	2	1663	192.109	6.07471
Q14289-2	Isoform 2 of Protein-tyrosine kinase 2-beta OS=Homo sapiens GN=PTK2B - [FAK2_HUMAN]	1.86	2	1	1	1	0	5.95877e+06	0					0	1.86	1	1					967	111.112	5.90967
Q8NA70	Protein FAM47B OS=Homo sapiens GN=FAM47B PE=2 SV=2 - [FA47B_HUMAN]	1.86	1	1	1	1	0	0	10779865									0	1.86	1	1	645	73.8977	8.73389
Q99550-2	Isoform 2 of M-phase phosphoprotein 9 OS=Homo sapiens GN=MPHOSPH9 - [MPP9_HUMAN]	1.85	2	1	1	1	5.17275e+06	0	0	0	1.85	1	1									1028	115.655	6.27783
O43683	Mitotic checkpoint serine/threonine-protein kinase BUB1 OS=Homo sapiens GN=BUB1 PE=1 SV=1 - [BUB1_HUMAN]	1.84	1	1	1	4	1.97695e+07	2.07485e+08	0	2.11919	1.84	1	1	2.09721	1.84	1	3					1085	122.297	6.46826
P12955	Xaa-Pro dipeptidase OS=Homo sapiens GN=PEPD PE=1 SV=3 - [PEPD_HUMAN]	1.83	1	1	1	2	0	0	2.06178e+06									4.51248	1.83	2	2	493	54.5129	5.99854
O14986-2	Isoform 2 of Phosphatidylinositol-4-phosphate 5-kinase type-1 beta OS=Homo sapiens GN=PIP5K1B - [PI51B_HUMAN]	1.82	1	1	1	18	621030	0	0	9.39483	1.82	1	5	9.66805	1.82	1	5	16.2724	1.82	1	8	549	62.4456	8.52881
Q96RU2-2	Isoform 2 of Ubiquitin carboxyl-terminal hydrolase 28 OS=Homo sapiens GN=USP28 - [UBP28_HUMAN]	1.82	2	1	1	4	1.50251e+06	0	0	9.18161	1.82	1	4									1045	119.046	5.16064
B1AJZ9-4	Isoform 4 of Forkhead-associated domain-containing protein 1 OS=Homo sapiens GN=FHAD1 - [FHAD1_HUMAN]	1.82	3	2	2	3	2.83187e+06	0	0	0	1.16	1	1					0	1.31	1	2	1376	157.594	6.90283
Q9P2E3	NFX1-type zinc finger-containing protein 1 OS=Homo sapiens GN=ZNFX1 PE=1 SV=2 - [ZNFX1_HUMAN]	1.82	1	1	2	3	0	198204	53445601					2.22234	1.15	1	2	0	0.68	1	1	1918	220.084	7.29834
P80108	Phosphatidylinositol-glycan-specific phospholipase D OS=Homo sapiens GN=GPLD1 PE=1 SV=3 - [PHLD_HUMAN]	1.79	1	1	1	8	9.47557e+06	6.72679e+06	2.91324e+07	11.1261	1.79	2	4	6.42413	1.79	2	2	6.75983	1.79	2	2	840	92.278	6.3667
Q5HYC2-2	Isoform 2 of Uncharacterized protein KIAA2026 OS=Homo sapiens GN=KIAA2026 - [K2026_HUMAN]	1.78	2	1	1	1	0	0	0	2.70185	1.78	1	1									2073	224.406	9.08545
O75626-2	Isoform 2 of PR domain zinc finger protein 1 OS=Homo sapiens GN=PRDM1 - [PRDM1_HUMAN]	1.77	2	1	1	2	0	5.9109e+06	0					0	1.77	1	2					789	87.935	8.42627
P07359	Platelet glycoprotein Ib alpha chain OS=Homo sapiens GN=GP1BA PE=1 SV=1 - [GP1BA_HUMAN]	1.76	1	1	1	6	5.54283e+06	0	11123218	6.12011	1.76	2	2					7.83009	1.76	2	4	626	68.912	6.68311
Q9Y4W6	AFG3-like protein 2 OS=Homo sapiens GN=AFG3L2 PE=1 SV=2 - [AFG32_HUMAN]	1.76	1	1	1	1	0	169508128	0					0	1.76	1	1					797	88.5282	8.66064
Q8NFT8	Delta and Notch-like epidermal growth factor-related receptor OS=Homo sapiens GN=DNER PE=1 SV=1 - [DNER_HUMAN]	1.76	1	1	1	7	0	1.06251e+07	0					0	1.76	1	7					737	78.4225	5.17334
P08F94-2	Isoform 2 of Fibrocystin OS=Homo sapiens GN=PKHD1 - [PKHD1_HUMAN]	1.74	2	1	4	4	1.09894e+06	9.45378e+06	1.07999e+07	2.4077	0.68	1	1	2.40073	0.32	1	1	0	0.74	2	2	3396	371.418	6.30322
O94855	Protein transport protein Sec24D OS=Homo sapiens GN=SEC24D PE=1 SV=2 - [SC24D_HUMAN]	1.74	2	1	1	1	0	987887	0					2.01247	1.74	1	1					1032	112.936	7.25439
Q9Y5C1	Angiopoietin-related protein 3 OS=Homo sapiens GN=ANGPTL3 PE=1 SV=1 - [ANGL3_HUMAN]	1.74	1	1	1	2	0	0	4.13213e+06									4.02687	1.74	2	2	460	53.6042	6.69775
Q12884	Seprase OS=Homo sapiens GN=FAP PE=1 SV=5 - [SEPR_HUMAN]	1.71	1	1	1	4	917012	0	8.29207e+06	0	1.71	2	2					0	1.71	2	2	760	87.6567	6.65381
Q9BYX2-6	Isoform 6 of TBC1 domain family member 2A OS=Homo sapiens GN=TBC1D2 - [TBD2A_HUMAN]	1.71	6	1	1	52	4.44831e+07	9.55964e+07	3.39369e+08	20.7094	1.71	2	13	39.1371	1.71	2	27	8.66477	1.71	2	12	468	54.3842	7.13721
Q3ZCV2-2	Isoform 2 of Uncharacterized protein C1orf177 OS=Homo sapiens GN=C1orf177 - [CA177_HUMAN]	1.69	2	1	1	2	1.94516e+06	0	0	3.2925	1.69	1	2									414	47.2387	9.87646
O43505	N-acetyllactosaminide beta-1,3-N-acetylglucosaminyltransferase OS=Homo sapiens GN=B3GNT1 PE=1 SV=1 - [B3GN1_HUMAN]	1.69	1	1	1	2	1.11932e+06	0	4.69645e+06	1.82769	1.69	1	1					0	1.69	1	1	415	47.0889	7.1958
Q52M93	Zinc finger protein 585B OS=Homo sapiens GN=ZNF585B PE=2 SV=1 - [Z585B_HUMAN]	1.69	1	1	1	1	0	1.20718e+08	0					2.30285	1.69	1	1					769	88.0095	9.0415
P33908	Mannosyl-oligosaccharide 1,2-alpha-mannosidase IA OS=Homo sapiens GN=MAN1A1 PE=1 SV=3 - [MA1A1_HUMAN]	1.68	1	1	1	2	0	2.45814e+06	0					6.13818	1.68	2	2					653	72.9223	6.46826
Q8IWE5	Pleckstrin homology domain-containing family M member 2 OS=Homo sapiens GN=PLEKHM2 PE=1 SV=2 - [PKHM2_HUMAN]	1.67	1	1	1	3	4.87124e+06	0	0	5.1853	1.67	2	3									1019	112.709	4.93213
Q9BPX3	Condensin complex subunit 3 OS=Homo sapiens GN=NCAPG PE=1 SV=1 - [CND3_HUMAN]	1.67	1	1	1	1	0	6.54254e+06	0					2.01946	1.67	1	1					1015	114.262	5.59229
P98174	FYVE, RhoGEF and PH domain-containing protein 1 OS=Homo sapiens GN=FGD1 PE=1 SV=2 - [FGD1_HUMAN]	1.66	1	1	1	1	4.78822e+06	0	0	0	1.66	1	1									961	106.494	6.58057
P0C7V8	DDB1- and CUL4-associated factor 8-like protein 2 OS=Homo sapiens GN=DCAF8L2 PE=2 SV=1 - [DC8L2_HUMAN]	1.66	1	1	1	2	0	2.87217e+06	0					0	1.66	1	2					602	67.8695	4.88135
O15195-2	Isoform 2 of Villin-like protein OS=Homo sapiens GN=VILL - [VILL_HUMAN]	1.66	2	1	1	12	0	1.30188e+07	0					0	1.66	1	12					842	94.3575	7.1958
Q9UQ52	Contactin-6 OS=Homo sapiens GN=CNTN6 PE=1 SV=1 - [CNTN6_HUMAN]	1.65	1	1	1	1	0	0	0					0	1.65	1	1					1028	113.885	5.99854
O43143	Putative pre-mRNA-splicing factor ATP-dependent RNA helicase DHX15 OS=Homo sapiens GN=DHX15 PE=1 SV=2 - [DHX15_HUMAN]	1.64	1	1	1	2	0	0	0	0	1.64	1	1					0	1.64	1	1	795	90.8752	7.45947
Q05DH4	Protein FAM160A1 OS=Homo sapiens GN=FAM160A1 PE=2 SV=2 - [F16A1_HUMAN]	1.63	1	1	1	1	1.12971e+06	0	0	0	1.63	1	1									1040	116.547	4.85596
Q96K78	Probable G-protein coupled receptor 128 OS=Homo sapiens GN=GPR128 PE=1 SV=2 - [GP128_HUMAN]	1.63	1	1	1	6	0	2.34728e+06	0					0	1.63	1	6					797	88.8518	8.45557
Q8IWT6	Leucine-rich repeat-containing protein 8A OS=Homo sapiens GN=LRRC8A PE=1 SV=1 - [LRC8A_HUMAN]	1.6	1	1	1	2	2330878	0	87527918	2.91015	1.6	1	1					2.35563	1.6	1	1	810	94.1387	7.94287
O60486	Plexin-C1 OS=Homo sapiens GN=PLXNC1 PE=1 SV=1 - [PLXC1_HUMAN]	1.59	1	1	2	5	0	2.22908e+07	1.14236e+07					2.88416	0.96	1	1	8.6165	1.59	2	4	1568	175.63	7.60596
Q6VUC0	Transcription factor AP-2-epsilon OS=Homo sapiens GN=TFAP2E PE=2 SV=1 - [AP2E_HUMAN]	1.58	1	1	1	9	0	1.23482e+07	0					1.71981	1.58	2	9					442	46.1829	8.36768
Q9C0D6	FH2 domain-containing protein 1 OS=Homo sapiens GN=FHDC1 PE=2 SV=2 - [FHDC1_HUMAN]	1.57	1	1	1	1	4.63229e+06	0	0	0	1.57	1	1									1143	124.684	9.02686
Q99569-2	Isoform 2 of Plakophilin-4 OS=Homo sapiens GN=PKP4 - [PKP4_HUMAN]	1.57	2	1	1	2	3.85988e+06	0	5.53638e+07	0	1.57	1	1					0	1.57	1	1	1149	127.066	8.95361
Q8N394	Transmembrane and TPR repeat-containing protein 2 OS=Homo sapiens GN=TMTC2 PE=2 SV=1 - [TMTC2_HUMAN]	1.56	1	1	1	2	1.61247e+07	0	5.04086e+06	0	1.56	1	1					2.32158	1.56	1	1	836	94.0694	8.77783
Q8WUB8-3	Isoform 3 of PHD finger protein 10 OS=Homo sapiens GN=PHF10 - [PHF10_HUMAN]	1.55	3	1	1	1	0	4.59983e+06	0					1.87738	1.55	1	1					451	51.2569	6.771
Q4L180-6	Isoform 6 of Filamin A-interacting protein 1-like OS=Homo sapiens GN=FILIP1L - [FIL1L_HUMAN]	1.55	6	1	1	8	0	5.19281e+06	6.07213e+06					1.64269	1.55	1	4	0	1.55	1	4	711	80.7564	6.99072
Q9H324	A disintegrin and metalloproteinase with thrombospondin motifs 10 OS=Homo sapiens GN=ADAMTS10 PE=1 SV=2 - [ATS10_HUMAN]	1.54	1	1	1	17	1.10322e+07	153773808	1.38535e+07	6.79766	1.54	1	4	11.5483	1.54	1	8	5.11569	1.54	1	5	1103	120.796	7.94287
Q09028-4	Isoform 4 of Histone-binding protein RBBP4 OS=Homo sapiens GN=RBBP4 - [RBBP4_HUMAN]	1.54	5	1	1	10	9.62574e+06	7.32889e+06	58535398	7.64353	1.54	2	4	7.35075	1.54	2	4	1.83259	1.54	1	2	390	43.455	4.95752
Q8NHS3	Major facilitator superfamily domain-containing protein 8 OS=Homo sapiens GN=MFSD8 PE=1 SV=1 - [MFSD8_HUMAN]	1.54	1	1	1	4	0	9.02146e+06	0					1.61334	1.54	1	4					518	57.5902	6.85889
Q8TED0	U3 small nucleolar RNA-associated protein 15 homolog OS=Homo sapiens GN=UTP15 PE=1 SV=3 - [UTP15_HUMAN]	1.54	1	1	1	1	0	620068	0					0	1.54	1	1					518	58.3786	9.11475
P09619	Platelet-derived growth factor receptor beta OS=Homo sapiens GN=PDGFRB PE=1 SV=1 - [PGFRB_HUMAN]	1.54	1	1	1	2	0	0	9.68548e+06									2.59446	1.54	2	2	1106	123.889	4.98291
Q92817	Envoplakin OS=Homo sapiens GN=EVPL PE=1 SV=3 - [EVPL_HUMAN]	1.52	1	1	2	2	0	0	4309291					0	0.84	1	1	2.04545	0.69	1	1	2033	231.463	6.96143
P16157-2	Isoform Er16 of Ankyrin-1 OS=Homo sapiens GN=ANK1 - [ANK1_HUMAN]	1.51	17	1	1	2	417299	0	0	4.93719	1.51	1	2									1519	166.376	7.26904
P42229	Signal transducer and activator of transcription 5A OS=Homo sapiens GN=STAT5A PE=1 SV=1 - [STA5A_HUMAN]	1.51	1	1	1	12	1.41824e+07	23263959	0	13.2953	1.51	1	9	1.81507	1.51	1	3					794	90.5903	6.39209
P02452	Collagen alpha-1(I) chain OS=Homo sapiens GN=COL1A1 PE=1 SV=5 - [CO1A1_HUMAN]	1.5	1	1	1	2	1.80457e+06	0	7.66989e+06	4.40121	1.5	1	1					4.84435	1.5	1	1	1464	138.857	5.79541
Q5SQQ9	Ventral anterior homeobox 1 OS=Homo sapiens GN=VAX1 PE=2 SV=1 - [VAX1_HUMAN]	1.5	5	1	1	10	6.76558e+06	1.51737e+07	891710	1.61403	1.5	1	5	0	1.5	1	4	0	1.5	1	1	334	34.6918	9.37842
A6NMB1	Sialic acid-binding Ig-like lectin 16 OS=Homo sapiens GN=SIGLEC16 PE=2 SV=3 - [SIG16_HUMAN]	1.46	1	1	1	49	2.44029e+08	1.79931e+09	3.46228e+08	3.32194	1.46	2	12	1.64689	1.46	2	20	3.27256	1.46	2	17	481	52.9582	9.02686
Q9UL01	Dermatan-sulfate epimerase OS=Homo sapiens GN=DSE PE=1 SV=1 - [DSE_HUMAN]	1.46	1	1	1	2	0	2.17064e+06	0					0	1.46	1	2					958	109.703	8.08936
Q13586	Stromal interaction molecule 1 OS=Homo sapiens GN=STIM1 PE=1 SV=3 - [STIM1_HUMAN]	1.46	1	1	1	1	0	0	7.58776e+07									0	1.46	1	1	685	77.3753	6.66846
Q02388-2	Isoform 2 of Collagen alpha-1(VII) chain OS=Homo sapiens GN=COL7A1 - [CO7A1_HUMAN]	1.44	2	1	2	3	743942	4.35032e+07	0	0	0.76	1	1	0	0.69	1	2					2912	292.09	6.22705
O43306-2	Isoform 2 of Adenylate cyclase type 6 OS=Homo sapiens GN=ADCY6 - [ADCY6_HUMAN]	1.43	2	1	1	5	1.12325e+07	2.97985e+07	60143958	6.67353	1.43	1	2	5.21993	1.43	1	2	2.77386	1.43	1	1	1115	124.784	8.41162
Q5EBL2	Zinc finger protein 628 OS=Homo sapiens GN=ZNF628 PE=2 SV=2 - [ZN628_HUMAN]	1.42	1	1	1	10	8.66136e+06	1.11161e+07	0	6.77089	1.42	1	6	2.7401	1.42	1	4					1055	110.442	8.29443
P51617-4	Isoform 4 of Interleukin-1 receptor-associated kinase 1 OS=Homo sapiens GN=IRAK1 - [IRAK1_HUMAN]	1.42	4	1	1	7	7.05776e+06	0	4.69005e+07	0	1.42	1	4					1.68606	1.42	2	3	633	67.9792	6.43018
Q63HN8	RING finger protein 213 OS=Homo sapiens GN=RNF213 PE=1 SV=2 - [RN213_HUMAN]	1.4	1	1	4	5	772209	0	0	3.76695	1.04	3	4	0	0.37	1	1					3280	373.742	6.91748
Q8TE57-2	Isoform 2 of A disintegrin and metalloproteinase with thrombospondin motifs 16 OS=Homo sapiens GN=ADAMTS16 - [ATS16_HUMAN]	1.4	2	1	1	1	0	7.13559e+06	0					0	1.4	1	1					1072	119.429	8.55811
Q68DC2	Ankyrin repeat and SAM domain-containing protein 6 OS=Homo sapiens GN=ANKS6 PE=1 SV=2 - [ANKS6_HUMAN]	1.38	2	1	1	15	1.66711e+07	1.22018e+07	0	0	1.38	2	7	0	1.38	2	8					871	92.162	7.38623
Q8NE71-2	Isoform 2 of ATP-binding cassette sub-family F member 1 OS=Homo sapiens GN=ABCF1 - [ABCF1_HUMAN]	1.36	2	1	1	14	2.70265e+06	5.22191e+07	0	2.06557	1.36	1	1	18.2442	1.36	1	13					807	91.6235	7.6792
Q6W4X9	Mucin-6 OS=Homo sapiens GN=MUC6 PE=1 SV=3 - [MUC6_HUMAN]	1.35	1	1	1	2	0	0	0									0	1.35	1	2	2439	256.887	7.38623
P42263	Glutamate receptor 3 OS=Homo sapiens GN=GRIA3 PE=1 SV=2 - [GRIA3_HUMAN]	1.34	2	1	1	5	6.00946e+06	9.16328e+06	4.30993e+07	1.60512	1.34	1	1	1.60003	1.34	1	2	0	1.34	1	2	894	101.092	8.54346
P22105-3	Isoform 3 of Tenascin-X OS=Homo sapiens GN=TNXB - [TENX_HUMAN]	1.34	4	2	4	10	8.77976e+06	8.55039e+06	6.25978e+06	11.0237	0.71	3	5	0	0.12	1	1	7.85206	1.23	4	4	4242	457.932	5.17334
Q9HCU0	Endosialin OS=Homo sapiens GN=CD248 PE=1 SV=1 - [CD248_HUMAN]	1.32	1	1	1	2	0	0	0									1.60606	1.32	2	2	757	80.8073	5.35107
Q9NTJ3-2	Isoform 2 of Structural maintenance of chromosomes protein 4 OS=Homo sapiens GN=SMC4 - [SMC4_HUMAN]	1.3	2	1	1	5	1.02812e+07	5.67101e+06	53394459	5.2037	1.3	1	2	2.02376	1.3	1	1	5.35332	1.3	1	2	1230	140.191	6.80029
Q5H9U9-2	Isoform 2 of Probable ATP-dependent RNA helicase DDX60-like OS=Homo sapiens GN=DDX60L - [DDX6L_HUMAN]	1.3	2	1	1	24	1411336576	5.36158e+07	5.23853e+06	0	1.3	1	4	1.69534	1.3	1	16	0	1.3	1	4	1308	152.156	7.29834
Q9NSC2-2	Isoform 2 of Sal-like protein 1 OS=Homo sapiens GN=SALL1 - [SALL1_HUMAN]	1.3	2	1	1	1	0	2.04362e+06	0					2.6127	1.3	1	1					1227	129.49	6.99072
Q9Y2L9-2	Isoform 2 of Leucine-rich repeat and calponin homology domain-containing protein 1 OS=Homo sapiens GN=LRCH1 - [LRCH1_HUMAN]	1.29	2	1	1	2	0	0	6.93074e+06									1.6631	1.29	1	2	696	77.1763	5.88428
Q8TBY9-2	Isoform 2 of WD repeat-containing protein 66 OS=Homo sapiens GN=WDR66 - [WDR66_HUMAN]	1.28	2	1	1	1	0	0	0					0	1.28	1	1					941	106.238	5.2876
P19338	Nucleolin OS=Homo sapiens GN=NCL PE=1 SV=3 - [NUCL_HUMAN]	1.27	1	1	1	4	2.578e+06	0	0	9.51267	1.27	2	4									710	76.5684	4.70361
Q02846	Retinal guanylyl cyclase 1 OS=Homo sapiens GN=GUCY2D PE=1 SV=2 - [GUC2D_HUMAN]	1.27	1	1	1	1	0	0	4.64333e+06									0	1.27	1	1	1103	119.983	7.44482
P16112-3	Isoform 3 of Aggrecan core protein OS=Homo sapiens GN=ACAN - [PGCA_HUMAN]	1.25	3	1	1	9	0	0	0	2.79343	1.25	1	4	8.38668	1.25	1	5					2316	239.089	4.13232
Q9C026-4	Isoform 4 of E3 ubiquitin-protein ligase TRIM9 OS=Homo sapiens GN=TRIM9 - [TRIM9_HUMAN]	1.25	1	1	1	13	6.69865e+06	8.69438e+07	1.00715e+07	0	1.25	1	4	7.1446	1.25	1	5	1.63393	1.25	1	4	802	89.7044	7.07861
Q96J65	Multidrug resistance-associated protein 9 OS=Homo sapiens GN=ABCC12 PE=1 SV=2 - [MRP9_HUMAN]	1.25	1	1	1	2	6.93683e+06	0	3.54721e+07	0	1.25	1	1					0	1.25	1	1	1359	152.2	8.35303
Q3B7T1-5	Isoform 4 of Erythroid differentiation-related factor 1 OS=Homo sapiens GN=EDRF1 - [EDRF1_HUMAN]	1.25	2	1	1	1	0	0	1.07808e+07									2.89845	1.25	1	1	1204	134.796	6.46826
O75362	Zinc finger protein 217 OS=Homo sapiens GN=ZNF217 PE=1 SV=1 - [ZN217_HUMAN]	1.24	1	1	1	3	0	0	2.81018e+06									0	1.24	2	3	1048	115.199	8.48486
Q00610-2	Isoform 2 of Clathrin heavy chain 1 OS=Homo sapiens GN=CLTC - [CLH1_HUMAN]	1.22	2	1	1	1	735771	0	0	4.88226	1.22	1	1									1639	187.771	5.69385
Q76KX8-2	Isoform 2 of Zinc finger protein 534 OS=Homo sapiens GN=ZNF534 - [ZN534_HUMAN]	1.21	2	0	1	10	0	1.12414e+06	0					0	1.21	1	10					661	75.7436	9.34912
P20929	Nebulin OS=Homo sapiens GN=NEB PE=1 SV=4 - [NEBU_HUMAN]	1.2	1	0	6	13	1.25515e+06	2.19094e+07	543306	2.32701	0.58	3	4	10.1654	0.96	5	8	0	0.1	1	1	6669	772.441	9.0708
O95907	Monocarboxylate transporter 3 OS=Homo sapiens GN=SLC16A8 PE=2 SV=1 - [MOT3_HUMAN]	1.19	1	1	1	79	2.54708e+08	8.7225e+08	4.60252e+08	3.33201	1.19	1	24	1.92825	1.19	2	36	1.67771	1.19	1	19	504	52.2852	5.66846
P48995-2	Isoform Short of Short transient receptor potential channel 1 OS=Homo sapiens GN=TRPC1 - [TRPC1_HUMAN]	1.19	2	1	1	3	1.50079e+06	3.40292e+06	6.05863e+06	1.82075	1.19	1	1	1.86785	1.19	1	1	1.84984	1.19	1	1	759	87.5598	8.04541
Q9NQ66-2	Isoform B of 1-phosphatidylinositol-4,5-bisphosphate phosphodiesterase beta-1 OS=Homo sapiens GN=PLCB1 - [PLCB1_HUMAN]	1.19	2	1	1	3	0	1.9932e+07	0					8.0324	1.19	1	3					1173	133.619	6.41748
Q9UHG3	Prenylcysteine oxidase 1 OS=Homo sapiens GN=PCYOX1 PE=1 SV=3 - [PCYOX_HUMAN]	1.19	1	1	1	2	0	0	4.56058e+06									0	1.19	2	2	505	56.6037	6.17627
Q9NP78-3	Isoform 3 of ATP-binding cassette sub-family B member 9 OS=Homo sapiens GN=ABCB9 - [ABCB9_HUMAN]	1.17	5	1	1	34	3.92687e+07	5.66785e+07	1.66975e+08	5.01671	1.17	2	10	6.94507	1.17	2	14	0	1.17	2	10	596	66.1955	8.49951
Q5D862	Filaggrin-2 OS=Homo sapiens GN=FLG2 PE=1 SV=1 - [FILA2_HUMAN]	1.17	1	1	2	5	1.02234e+06	0	3.0528e+06	9.4335	0.79	2	2					10.2361	1.17	3	3	2391	247.928	8.30908
Q9NRR4-3	Isoform 3 of Ribonuclease 3 OS=Homo sapiens GN=DROSHA - [RNC_HUMAN]	1.17	3	1	1	1	0	0	5.1032e+06									2.19676	1.17	1	1	1192	138.069	8.04541
Q96SN8-4	Isoform 4 of CDK5 regulatory subunit-associated protein 2 OS=Homo sapiens GN=CDK5RAP2 - [CK5P2_HUMAN]	1.16	3	1	1	6	0	3.42909e+07	5.57281e+07					0	1.16	1	5	2.27385	1.16	1	1	1814	206.195	5.59229
P11168	Solute carrier family 2, facilitated glucose transporter member 2 OS=Homo sapiens GN=SLC2A2 PE=1 SV=1 - [GTR2_HUMAN]	1.15	4	1	1	40	2.02362e+06	4.72338e+07	39733251	0	1.15	1	3	0	1.15	2	27	0	1.15	2	10	524	57.4521	7.97217
Q7Z406-5	Isoform 5 of Myosin-14 OS=Homo sapiens GN=MYH14 - [MYH14_HUMAN]	1.15	5	1	1	5	0	71476390	3.55764e+08					1.95248	1.15	1	2	6.81416	1.15	1	3	1478	167.793	5.92236
Q96PY6-5	Isoform 5 of Serine/threonine-protein kinase Nek1 OS=Homo sapiens GN=NEK1 - [NEK1_HUMAN]	1.14	7	0	1	1	0	2.43539e+06	0					0	1.14	1	1					527	60.2125	9.5835
Q9H4Z3	Phosphorylated CTD-interacting factor 1 OS=Homo sapiens GN=PCIF1 PE=1 SV=1 - [PCIF1_HUMAN]	1.14	1	1	1	1	0	0	0									1.66808	1.14	1	1	704	80.6184	7.41553
Q969F9-2	Isoform 2 of Hermansky-Pudlak syndrome 3 protein OS=Homo sapiens GN=HPS3 - [HPS3_HUMAN]	1.12	2	1	1	9	2.58719e+07	3.68622e+07	3.18283e+08	0	1.12	1	1	0	1.12	1	4	4.14749	1.12	1	4	890	100.564	6.7417
Q9BVG8-4	Isoform 3 of Kinesin-like protein KIFC3 OS=Homo sapiens GN=KIFC3 - [KIFC3_HUMAN]	1.1	3	1	1	1	1.95353e+06	0	0	0	1.1	1	1									637	71.5628	6.50732
Q86XD8	AN1-type zinc finger and ubiquitin domain-containing protein 1 OS=Homo sapiens GN=ANUBL1 PE=2 SV=2 - [ANUB1_HUMAN]	1.1	1	1	1	3	0	1.04646e+07	0					1.82462	1.1	1	3					727	80.3072	8.35303
A6NKG5	Retrotransposon-like protein 1 OS=Homo sapiens GN=RTL1 PE=2 SV=2 - [RTL1_HUMAN]	1.1	1	1	1	1	0	3.80676e+07	0					2.60423	1.1	1	1					1359	155.079	5.19873
Q6T4R5-3	Isoform 3 of Nance-Horan syndrome protein OS=Homo sapiens GN=NHS - [NHS_HUMAN]	1.09	3	1	1	1	2.05732e+06	0	0	0	1.09	1	1									1473	160.655	7.02002
Q9BXF3-3	Isoform C of Cat eye syndrome critical region protein 2 OS=Homo sapiens GN=CECR2 - [CECR2_HUMAN]	1.09	2	1	1	1	0	587016	0					0	1.09	1	1					1464	161.964	6.85889
Q8IWC1-2	Isoform 2 of MAP7 domain-containing protein 3 OS=Homo sapiens GN=MAP7D3 - [MA7D3_HUMAN]	1.08	3	1	1	3	0	0	0					5.99293	1.08	1	3					835	93.7268	9.27588
O15394	Neural cell adhesion molecule 2 OS=Homo sapiens GN=NCAM2 PE=1 SV=2 - [NCAM2_HUMAN]	1.08	1	1	1	1	0	0	2.7464e+06									0	1.08	1	1	837	92.9882	5.60498
Q13315	Serine-protein kinase ATM OS=Homo sapiens GN=ATM PE=1 SV=3 - [ATM_HUMAN]	1.05	1	1	2	3	442530	1.67924e+06	0	2.25401	1.05	2	2	0	0.56	1	1					3056	350.489	6.81494
Q8WWN8	Arf-GAP with Rho-GAP domain, ANK repeat and PH domain-containing protein 3 OS=Homo sapiens GN=ARAP3 PE=1 SV=1 - [ARAP3_HUMAN]	1.04	1	1	1	7	2.29773e+06	1.15426e+07	0	0	1.04	1	1	0	1.04	1	5	0	1.04	1	1	1544	169.738	7.07861
O75970-3	Isoform 3 of Multiple PDZ domain protein OS=Homo sapiens GN=MPDZ - [MPDZ_HUMAN]	1.03	3	1	1	1	603741	0	0	0	1.03	1	1									2037	217.78	5.03369
Q9UL36-2	Isoform A of Zinc finger protein 236 OS=Homo sapiens GN=ZNF236 - [ZN236_HUMAN]	1.03	2	1	1	3	0	2.06248e+06	0					0	1.03	1	3					1558	172.597	8.104
Q68DL7	Uncharacterized protein C18orf63 OS=Homo sapiens GN=C18orf63 PE=2 SV=2 - [CR063_HUMAN]	1.02	1	1	1	14	2.04557e+06	8.2649e+06	5.49552e+06	7.48486	1.02	2	4	1.71926	1.02	2	7	1.72119	1.02	2	3	685	77.1813	9.80322
Q15833-2	Isoform 2 of Syntaxin-binding protein 2 OS=Homo sapiens GN=STXBP2 - [STXB2_HUMAN]	1.02	3	1	1	25	2.6387e+09	7.19997e+07	6.53814e+08	0	1.02	1	12	0	1.02	1	3	0	1.02	1	10	590	66.0963	6.55127
Q9UI32	Glutaminase liver isoform, mitochondrial OS=Homo sapiens GN=GLS2 PE=1 SV=2 - [GLSL_HUMAN]	1	1	0	1	26	1.34276e+08	2.22963e+08	6.53814e+08	0	1	2	14	0	1	1	2	0	1	2	10	602	66.2801	7.29834
Q86VB7-3	Isoform 3 of Scavenger receptor cysteine-rich type 1 protein M130 OS=Homo sapiens GN=CD163 - [C163A_HUMAN]	0.98	4	1	1	2	0	0	6.74913e+06									4.20044	0.98	2	2	1121	121.53	6.11279
O43157-2	Isoform 2 of Plexin-B1 OS=Homo sapiens GN=PLXNB1 - [PLXB1_HUMAN]	0.97	2	1	1	4	349409	4.66496e+06	4.1531e+06	5.99786	0.97	1	2	2.80055	0.97	1	1	2.41034	0.97	1	1	1952	214.275	5.78271
A5YKK6-2	Isoform 2 of CCR4-NOT transcription complex subunit 1 OS=Homo sapiens GN=CNOT1 - [CNOT1_HUMAN]	0.97	4	2	2	3	3.55895e+06	986948	0	0	0.42	1	2	0	0.55	1	1					2371	266.211	7.04932
Q9H8L6	Multimerin-2 OS=Homo sapiens GN=MMRN2 PE=1 SV=2 - [MMRN2_HUMAN]	0.95	1	1	1	4	1.95036e+06	0	1.06153e+07	3.76306	0.95	2	2					1.96201	0.95	2	2	949	104.344	5.85889
Q6P2S7-2	Isoform 2 of Tetratricopeptide repeat protein GNN OS=Homo sapiens GN=GNN - [GNN_HUMAN]	0.95	2	1	1	2	0	3.67441e+06	1.3334e+08					0	0.95	1	1	0	0.95	1	1	1053	121.586	7.47412
P48634	Protein PRRC2A OS=Homo sapiens GN=PRRC2A PE=1 SV=3 - [PRC2A_HUMAN]	0.93	1	1	1	2	2.59782e+07	1.12898e+07	0	0	0.93	1	1	0	0.93	1	1					2157	228.724	9.45166
O75460	Serine/threonine-protein kinase/endoribonuclease IRE1 OS=Homo sapiens GN=ERN1 PE=1 SV=2 - [ERN1_HUMAN]	0.92	1	1	1	80	1.52955e+07	3.88442e+07	0	9.06474	0.92	2	12	73.5146	0.92	2	68					977	109.666	6.41748
P82094	TATA element modulatory factor OS=Homo sapiens GN=TMF1 PE=1 SV=2 - [TMF1_HUMAN]	0.91	2	1	1	19	0	0	0	6.2475	0.91	1	7	0	0.91	1	4	4.0874	0.91	1	8	1093	122.767	4.91943
P52333-2	Isoform 1 of Tyrosine-protein kinase JAK3 OS=Homo sapiens GN=JAK3 - [JAK3_HUMAN]	0.91	2	1	1	5	0	6.47521e+06	0					0	0.91	1	5					1094	121.19	7.18115
Q5TBA9	Protein furry homolog OS=Homo sapiens GN=FRY PE=1 SV=1 - [FRY_HUMAN]	0.9	5	1	2	9	3.87415e+08	1.70836e+08	2.43426e+07	0	0.17	1	3	0	0.9	2	4	0	0.17	1	2	3013	338.659	5.98584
Q12860-2	Isoform 2 of Contactin-1 OS=Homo sapiens GN=CNTN1 - [CNTN1_HUMAN]	0.89	2	1	1	4	2.34728e+06	0	0	4.52892	0.89	2	2					2.5255	0.89	2	2	1007	111.796	5.77002
Q12986-2	Isoform 2 of Transcriptional repressor NF-X1 OS=Homo sapiens GN=NFX1 - [NFX1_HUMAN]	0.88	2	1	1	59	1.09032e+07	2.53605e+08	6.2917e+08	20.9556	0.88	2	17	20.367	0.88	2	16	24.7166	0.88	2	26	1024	113.548	8.14795
Q7Z3J2-2	Isoform 2 of UPF0505 protein C16orf62 OS=Homo sapiens GN=C16orf62 - [CP062_HUMAN]	0.86	2	1	1	3	7.17438e+06	1.63158e+07	0	2.12599	0.86	1	1	4.21777	0.86	1	2					813	93.0256	6.82959
Q8N4C8-5	Isoform 5 of Misshapen-like kinase 1 OS=Homo sapiens GN=MINK1 - [MINK1_HUMAN]	0.86	5	1	1	20	0	0	0	0	0.86	1	1	2.07414	0.86	1	8	21.539	0.86	1	11	1275	143.548	7.12256
Q9Y2H5	Pleckstrin homology domain-containing family A member 6 OS=Homo sapiens GN=PLEKHA6 PE=1 SV=4 - [PKHA6_HUMAN]	0.86	1	1	1	6	0	1.36168e+06	0					0	0.86	1	6					1048	117.056	9.1001
Q9P219	Protein Daple OS=Homo sapiens GN=CCDC88C PE=1 SV=3 - [DAPLE_HUMAN]	0.84	1	1	2	3	0	0	3.76327e+06									1.62201	0.84	3	3	2028	228.091	6.22705
Q5T1M5-2	Isoform 2 of FK506-binding protein 15 OS=Homo sapiens GN=FKBP15 - [FKB15_HUMAN]	0.83	2	1	1	3	5.47438e+06	0	1.78924e+07	4.58002	0.83	1	2					2.45317	0.83	1	1	1209	132.385	5.17334
O15320-8	Isoform 9 of Cutaneous T-cell lymphoma-associated antigen 5 OS=Homo sapiens GN=CTAGE5 - [CTGE5_HUMAN]	0.83	12	0	1	2	0	1.03923e+07	0					0	0.83	1	2					724	81.7908	5.13525
O43150-2	Isoform 2 of Arf-GAP with SH3 domain, ANK repeat and PH domain-containing protein 2 OS=Homo sapiens GN=ASAP2 - [ASAP2_HUMAN]	0.83	2	0	1	2	0	0	5.76087e+06									0	0.83	1	2	961	106.915	6.49365
Q96JB1-2	Isoform 2 of Dynein heavy chain 8, axonemal OS=Homo sapiens GN=DNAH8 - [DYH8_HUMAN]	0.81	2	1	3	3	1.64699e+06	2.32204e+07	0	0	0.49	2	2	0	0.31	1	1					4454	510.122	6.29053
Q8IVL1-5	Isoform 5 of Neuron navigator 2 OS=Homo sapiens GN=NAV2 - [NAV2_HUMAN]	0.8	1	1	1	1	0	0	6.20825e+06									0	0.8	1	1	1493	161.847	8.44092
Q8WYP5	Protein ELYS OS=Homo sapiens GN=AHCTF1 PE=1 SV=3 - [ELYS_HUMAN]	0.79	2	1	1	7	6.05801e+06	2.36646e+07	3.08116e+07	5.36747	0.79	1	2	9.05028	0.79	1	3	4.69674	0.79	1	2	2266	252.342	6.59521
P31629	Transcription factor HIVEP2 OS=Homo sapiens GN=HIVEP2 PE=1 SV=2 - [ZEP2_HUMAN]	0.78	1	1	1	14	48162.1	0	0	14.8718	0.78	1	14									2446	268.885	6.96143
Q9H254-3	Isoform 3 of Spectrin beta chain, brain 3 OS=Homo sapiens GN=SPTBN4 - [SPTN4_HUMAN]	0.77	3	1	1	1	0	0	0					0	0.77	1	1					1307	148.531	6.3667
Q01804-3	Isoform 3 of OTU domain-containing protein 4 OS=Homo sapiens GN=OTUD4 - [OTUD4_HUMAN]	0.76	2	1	1	7	2.06797e+06	2.90554e+07	0	0	0.76	1	3	0	0.76	1	4					1048	116.881	6.66846
Q6ZT98-3	Isoform 3 of Tubulin polyglutamylase TTLL7 OS=Homo sapiens GN=TTLL7 - [TTLL7_HUMAN]	0.76	2	0	1	13	1.89818e+06	1.23556e+07	4.45117e+08	0	0.76	1	4	0	0.76	1	2	0	0.76	1	7	792	92.1644	9.27588
Q6P3W7	SCY1-like protein 2 OS=Homo sapiens GN=SCYL2 PE=1 SV=1 - [SCYL2_HUMAN]	0.75	1	1	1	2	3.31597e+06	0	23392972	1.95416	0.75	1	1					1.75765	0.75	1	1	929	103.642	8.22119
Q2KHM9	Uncharacterized protein KIAA0753 OS=Homo sapiens GN=KIAA0753 PE=2 SV=3 - [K0753_HUMAN]	0.72	1	0	1	7	119069802	0	3.46228e+08	0	0.72	1	1					0	0.72	2	6	967	109.339	7.6792
P23470-2	Isoform 2 of Receptor-type tyrosine-protein phosphatase gamma OS=Homo sapiens GN=PTPRG - [PTPRG_HUMAN]	0.71	2	1	1	4	1.18167e+06	0	6.30012e+06	3.83142	0.71	2	2					2.01192	0.71	2	2	1416	158.671	6.21436
A8TX70-2	Isoform 2 of Collagen alpha-5(VI) chain OS=Homo sapiens GN=COL6A5 - [CO6A5_HUMAN]	0.71	2	1	1	1	0	2.26515e+07	0					0	0.71	1	1					2526	279.756	7.35693
Q14789	Golgin subfamily B member 1 OS=Homo sapiens GN=GOLGB1 PE=1 SV=2 - [GOGB1_HUMAN]	0.68	1	2	3	22	1.51904e+07	5.18549e+06	1.00424e+07	9.09524	0.49	2	5	5.46659	0.68	3	5	13.0004	0.52	2	12	3259	375.79	4.99561
O00339-3	Isoform 3 of Matrilin-2 OS=Homo sapiens GN=MATN2 - [MATN2_HUMAN]	0.66	3	1	1	2	0	3.82934e+06	0					0	0.66	1	2					915	102.165	6.18896
O60287	Nucleolar pre-ribosomal-associated protein 1 OS=Homo sapiens GN=URB1 PE=1 SV=4 - [NPA1P_HUMAN]	0.66	1	1	1	1	0	0	0									2.36185	0.66	1	1	2271	254.227	6.46826
P42338	Phosphatidylinositol-4,5-bisphosphate 3-kinase catalytic subunit beta isoform OS=Homo sapiens GN=PIK3CB PE=1 SV=1 - [PK3CB_HUMAN]	0.65	1	0	1	1	0	0	0					0	0.65	1	1					1070	122.683	7.09326
Q86TB3-2	Isoform 2 of Alpha-protein kinase 2 OS=Homo sapiens GN=ALPK2 - [ALPK2_HUMAN]	0.65	2	1	1	1	0	0	5.59615e+06									1.72096	0.65	1	1	2165	236.332	5.26221
Q8IVU3-2	Isoform 2 of Probable E3 ubiquitin-protein ligase HERC6 OS=Homo sapiens GN=HERC6 - [HERC6_HUMAN]	0.61	2	1	1	13	2.0405e+07	2.05786e+06	62671055	1.78833	0.61	2	4	0	0.61	2	2	6.9388	0.61	2	7	986	111.012	7.95752
P20701	Integrin alpha-L OS=Homo sapiens GN=ITGAL PE=1 SV=3 - [ITAL_HUMAN]	0.6	2	1	1	8	7.34555e+06	6.60465e+06	2.11012e+07	0	0.6	1	1	0	0.6	1	6	0	0.6	1	1	1170	128.688	5.63037
Q5T200-2	Isoform 2 of Zinc finger CCCH domain-containing protein 13 OS=Homo sapiens GN=ZC3H13 - [ZC3HD_HUMAN]	0.58	2	1	1	4	0	3.52069e+06	2.924e+06					2.19718	0.58	2	2	2.08388	0.58	2	2	1564	184.76	9.46631
Q8WXH0	Nesprin-2 OS=Homo sapiens GN=SYNE2 PE=1 SV=3 - [SYNE2_HUMAN]	0.57	3	1	2	2	0	0	9.04599e+06									2.88963	0.57	2	2	6885	795.944	5.36377
P56715	Oxygen-regulated protein 1 OS=Homo sapiens GN=RP1 PE=1 SV=1 - [RP1_HUMAN]	0.56	1	1	1	7	5.66372e+06	4.95822e+07	0	2.40353	0.56	1	1	13.3935	0.56	1	6					2156	240.511	5.79541
Q8NF91-7	Isoform 7 of Nesprin-1 OS=Homo sapiens GN=SYNE1 - [SYNE1_HUMAN]	0.56	5	1	2	4	0	4.75273e+06	2.87211e+08					0	0.32	1	2	2.01274	0.56	2	2	5580	642.271	5.84619
O15020-2	Isoform 2 of Spectrin beta chain, brain 2 OS=Homo sapiens GN=SPTBN2 - [SPTN2_HUMAN]	0.55	2	1	1	4	1.42183e+06	1.67045e+07	4.24203e+07	2.74526	0.55	1	1	4.74211	0.55	1	2	0	0.55	1	1	2365	268.143	6.11279
Q8NI35-5	Isoform 5 of InaD-like protein OS=Homo sapiens GN=INADL - [INADL_HUMAN]	0.53	5	1	1	6	0	9.01045e+07	0					3.61559	0.53	2	6					1134	125.154	4.88135
Q8IZT6	Abnormal spindle-like microcephaly-associated protein OS=Homo sapiens GN=ASPM PE=1 SV=2 - [ASPM_HUMAN]	0.52	1	1	1	1	0	7.75055e+06	0					0	0.52	1	1					3477	409.54	10.4478
O14617-3	Isoform 3 of AP-3 complex subunit delta-1 OS=Homo sapiens GN=AP3D1 - [AP3D1_HUMAN]	0.51	5	0	1	3	4.43157e+06	1.50093e+07	0	0	0.51	1	1	1.60007	0.51	1	2					984	111.168	8.104
Q9C0A1	Zinc finger homeobox protein 2 OS=Homo sapiens GN=ZFHX2 PE=2 SV=3 - [ZFHX2_HUMAN]	0.51	1	1	1	8	824751	0	0	4.53022	0.51	2	6	0	0.51	1	2					2572	274.003	5.88428
Q9UK61-2	Isoform 2 of Protein FAM208A OS=Homo sapiens GN=FAM208A - [F208A_HUMAN]	0.49	4	1	1	6	9.62574e+06	7.32889e+06	58535398	3.63135	0.49	2	2	3.76208	0.49	1	2	3.75908	0.49	1	2	1233	139.911	5.61768
Q03001	Dystonin OS=Homo sapiens GN=DST PE=1 SV=4 - [DYST_HUMAN]	0.49	1	1	3	105	8.22114e+06	3.12509e+08	245354099	1.62422	0.24	2	23	2.12471	0.42	3	55	0	0.17	1	27	7570	860.127	5.24951
Q9BYK8-2	Isoform 2 of Peroxisomal proliferator-activated receptor A-interacting complex 285 kDa protein OS=Homo sapiens GN=PRIC285 - [PR285_HUMAN]	0.43	3	1	1	7	2.70644e+06	25515386	3.25128e+06	0	0.43	1	2	0	0.43	1	4	0	0.43	1	1	2080	231.524	7.69385
P48681	Nestin OS=Homo sapiens GN=NES PE=1 SV=2 - [NEST_HUMAN]	0.43	1	1	1	3	0	1.71034e+07	0					3.74312	0.43	1	3					1621	177.332	4.36084
Q15149-7	Isoform 7 of Plectin OS=Homo sapiens GN=PLEC - [PLEC_HUMAN]	0.42	20	2	2	20	2.43507e+07	2.49675e+07	3.06034e+06	0	0.42	3	7	0	0.13	2	9	0	0.13	2	4	4515	512.292	5.77002
P21817-2	Isoform 2 of Ryanodine receptor 1 OS=Homo sapiens GN=RYR1 - [RYR1_HUMAN]	0.42	3	1	1	6	0	24818.7	0	4.61941	0.42	1	2	6.82081	0.42	1	4					5033	564.331	5.30029
Q5VU65	Nuclear pore membrane glycoprotein 210-like OS=Homo sapiens GN=NUP210L PE=2 SV=1 - [P210L_HUMAN]	0.42	1	1	1	1	0	3.21294e+07	0					1.7587	0.42	1	1					1888	210.471	7.50342
Q7Z2Y8	Interferon-induced very large GTPase 1 OS=Homo sapiens GN=GVINP1 PE=2 SV=2 - [GVIN1_HUMAN]	0.41	1	1	1	1	0	9.70543e+06	0					1.6798	0.41	1	1					2422	278.871	6.55127
Q9Y2F5	Uncharacterized protein KIAA0947 OS=Homo sapiens GN=KIAA0947 PE=1 SV=5 - [K0947_HUMAN]	0.4	1	1	1	1	0	418323	0					0	0.4	1	1					2266	247.737	5.47803
Q8WZ42-5	Isoform 5 of Titin OS=Homo sapiens GN=TTN - [TITIN_HUMAN]	0.37	7	2	7	10	8.26596e+06	2.508e+07	2.28488e+07	0	0.26	4	4	0	0.07	2	4	4.81845	0.1	2	2	32900	3650.93	6.44287
Q15643	Thyroid receptor-interacting protein 11 OS=Homo sapiens GN=TRIP11 PE=1 SV=3 - [TRIPB_HUMAN]	0.3	1	0	1	5	2.17952e+06	1.03923e+07	5.12073e+07	0	0.3	1	1	0	0.3	1	2	0	0.3	1	2	1979	227.447	5.26221
Q14686	Nuclear receptor coactivator 6 OS=Homo sapiens GN=NCOA6 PE=1 SV=3 - [NCOA6_HUMAN]	0.29	1	0	1	18	5.62903e+06	4.23261e+07	1.51109e+07	0	0.29	2	7	0	0.29	2	8	0	0.29	1	3	2063	219.008	9.36377
Q5CZC0	Fibrous sheath-interacting protein 2 OS=Homo sapiens GN=FSIP2 PE=1 SV=4 - [FSIP2_HUMAN]	0.25	1	1	1	23	2.21395e+06	3.04467e+07	1.78534e+09	0	0.25	1	2	0	0.25	1	18	0	0.25	1	3	6907	780.119	6.7124
P98160	Basement membrane-specific heparan sulfate proteoglycan core protein OS=Homo sapiens GN=HSPG2 PE=1 SV=4 - [PGBM_HUMAN]	0.23	1	1	1	4	456488	0	6.977e+06	2.43149	0.23	2	2					1.78098	0.23	2	2	4391	468.532	6.50732
P98164	Low-density lipoprotein receptor-related protein 2 OS=Homo sapiens GN=LRP2 PE=1 SV=3 - [LRP2_HUMAN]	0.21	1	1	1	3	2.76529e+06	0	2.53294e+07	1.74552	0.21	1	1					0	0.21	1	2	4655	521.616	5.08447
P20930	Filaggrin OS=Homo sapiens GN=FLG PE=1 SV=3 - [FILA_HUMAN]	0.2	1	1	1	1	1.61516e+06	0	0	0	0.2	1	1									4061	434.922	9.24658
